# Supplementary material for: Where ppm Quantities of Silsesquioxanes Make a Difference—Silanes and Cage Siloxanes as TiO2 Dispersants and Stabilizers for Pigmented Epoxy Resins
Source: MDPI journal article supplement (doi:10.3390/ma15020494), 2022-01-10

# Where ppm Quantities of Silsesquioxanes Make a Difference—Silanes and Cage Siloxanes as TiO<sub>2</sub> Dispersants and Stabilizers for Pigmented Epoxy Resins

Dariusz Brząkański <sup>1</sup>, Robert E. Przekop <sup>2,\*</sup>, Miłosz Frydrych <sup>1</sup>, Daria Pakuła <sup>1</sup>, Marta Dobrosielska <sup>3</sup>,  
Bogna Sztorch <sup>2</sup>, Bogdan Marciniak <sup>1,2,\*</sup>

<sup>1</sup> Faculty of Chemistry, Adam Mickiewicz University in Poznań, 8 Uniwersytetu Poznańskiego, 61-614 Poznań, Poland; d.brzakalski@gmail.com (D.B.), frydrych@amu.edu.pl (M.F.); darpak@amu.edu.pl (D.P.), bogdan.marciniak@amu.edu.pl (B.M.)

<sup>2</sup> Centre for Advanced Technologies, Adam Mickiewicz University in Poznań, 10 Uniwersytetu Poznańskiego, 61-614 Poznań, Poland; rprzekop@amu.edu.pl (R.E.P.), bogna.sztorch@amu.edu.pl, bogdan.marciniak@amu.edu.pl (B.M.)

<sup>3</sup> Faculty of Materials Science and Engineering, Warsaw University of Technology, 141 Wołoska, 02-507 Warsaw, Poland; Marta.Dobrosielska@pw.edu.pl (M.D.);

\* Correspondence: r.przekop@gmail.com, rprzekop@amu.edu.pl (R.E.P.), bogdan.marciniak@amu.edu.pl (B.M.)

## Table of contents

|                                                                      |    |
|----------------------------------------------------------------------|----|
| 1. Pictures of the equipment and samples.....                        | 2  |
| 2. NMR spectroscopy of the obtained compounds .....                  | 3  |
| 3. MALDI-TOF mass spectra of obtained spherosilicate compounds ..... | 9  |
| SS-6GP-2TMOS.....                                                    | 9  |
| SS-5GP-3TMOS.....                                                    | 14 |
| 4. SEM images of the TiO <sub>2</sub> /EP composites.....            | 19 |

## 1. Pictures of the equipment and samples

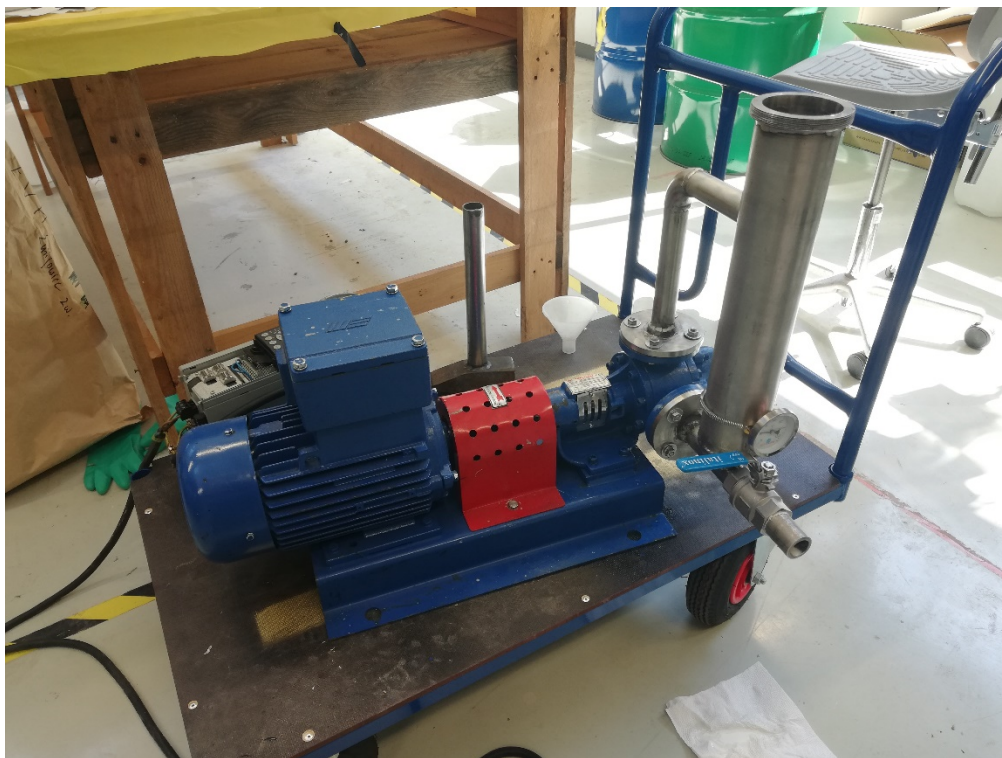

**Figure S1.** Internal gear pump setup used for preparation of  $\text{TiO}_2$ /epoxy dispersions

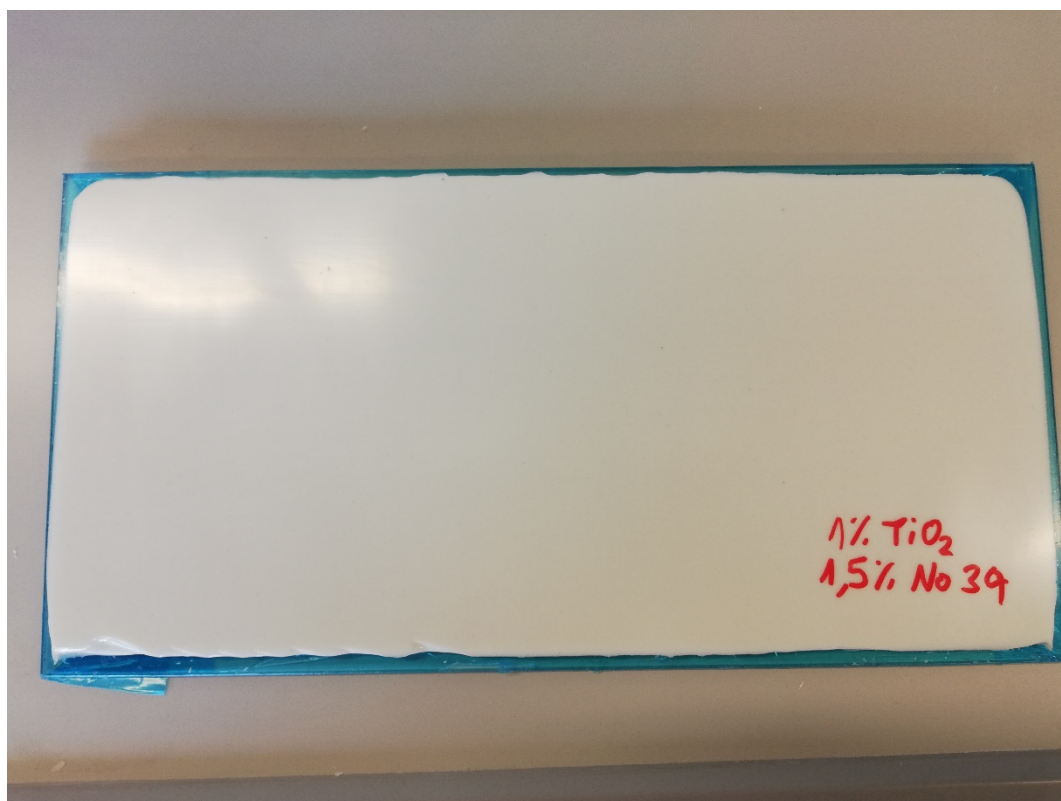

**Figure S2.** A sample of cured  $\text{TiO}_2$ /epoxy composite prepared



## 2. NMR spectroscopy of the obtained compounds

### 1,3,5,7,9,11,13,15-hexa((3-glycidoxypropyl)dimethylsiloxy)-di((trimethoxysilyl)dimethylsiloxy)pentacyclo[9.5.1.1<sup>3,9</sup>.1<sup>5,15</sup>.1<sup>7,13</sup>]octasiloxane (SS-6GP-2TMOs)

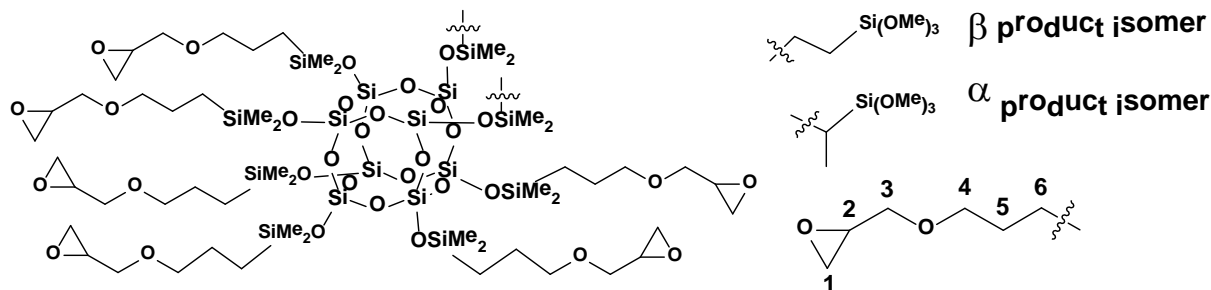

$^1\text{H}$  NMR (400 MHz,  $\text{CDCl}_3$ ):  $\delta$  (ppm) = 3.70–3.67 (m, 6H position 3), 3.55 (s, 18H, OMe), 3.48–3.40 (m, 12H, position 4), 3.39–3.36 (m, 6H, position 3), 3.14–3.11 (m, 6H, position 2), 2.79–2.77 (m, 6H, position 1), 2.60–2.59 (m, 6H, position 1), 1.65–1.60 (m, 12H, position 5), 1.11 (d, alpha product  $-\text{CH}_3$ ), 0.62–0.59 (m, 20H,  $\text{SiCH}_2\text{CH}_2\text{Si}$ , position 6), 0.14 (s, 48H,  $\text{SiMe}_2$ );  $\alpha$  and  $\beta$  isomers were observed in 8 : 92 ratio;

$^{13}\text{C}$  NMR (101 MHz,  $\text{CDCl}_3$ ):  $\delta$  (ppm) = 74.25, 71.59, 71.58 (glycidoxy group), 50.97, 50.78, 50.69 (OMe), 44.46 (propyl-3- $\text{CH}_2$ ), 23.32, 13.81, 13.80 (propyl-1 and propyl-2- $\text{CH}_2$ ), 8.62, 8.60 ( $\text{Si}-\text{CH}_2\text{CH}_2-\text{Si}$ ), 7.41, 5.29 ( $\text{SiCH}(\text{CH}_3)\text{Si}$ ), 0.44 ( $\text{Si}-\text{CH}_2\text{CH}_2-\text{Si}$ ), -0.25, -0.28, -0.31 (glycidoxypropyl  $\text{SiMe}_2$ ), -0.95, -0.98, -1.01 (trimethoxysilyl ethyl  $\text{SiMe}_2$ );

$^{29}\text{Si}$  NMR (79.5 MHz,  $\text{CDCl}_3$ ):  $\delta$  (ppm) = 13.23–13.18 (Si-trimethoxysilyl ethyl), 12.97–12.91 (Si-glycidoxypropyl), -41.67 ( $\text{Si}(\text{OMe})_3$ ), -109.09 (core).

#### $^1\text{H}$ NMR

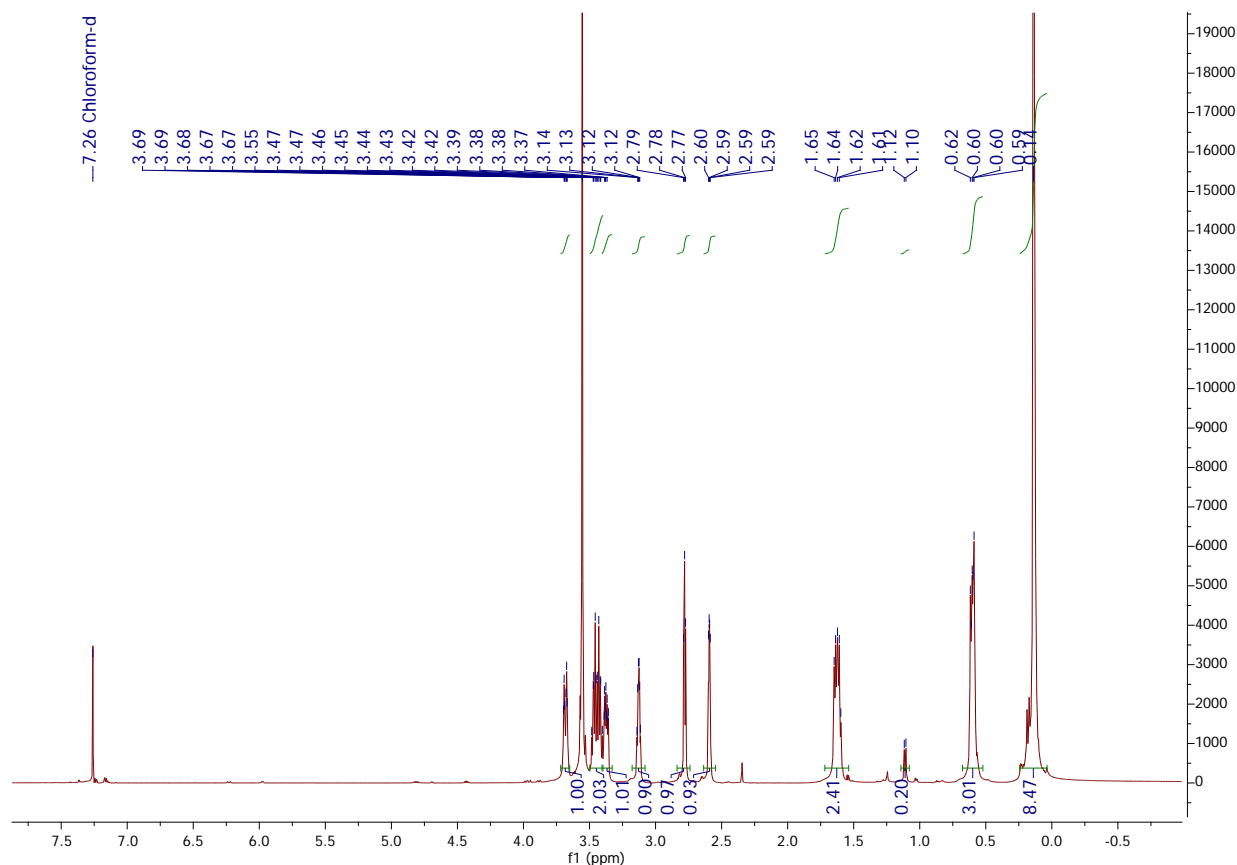

$^{13}\text{C}$  NMR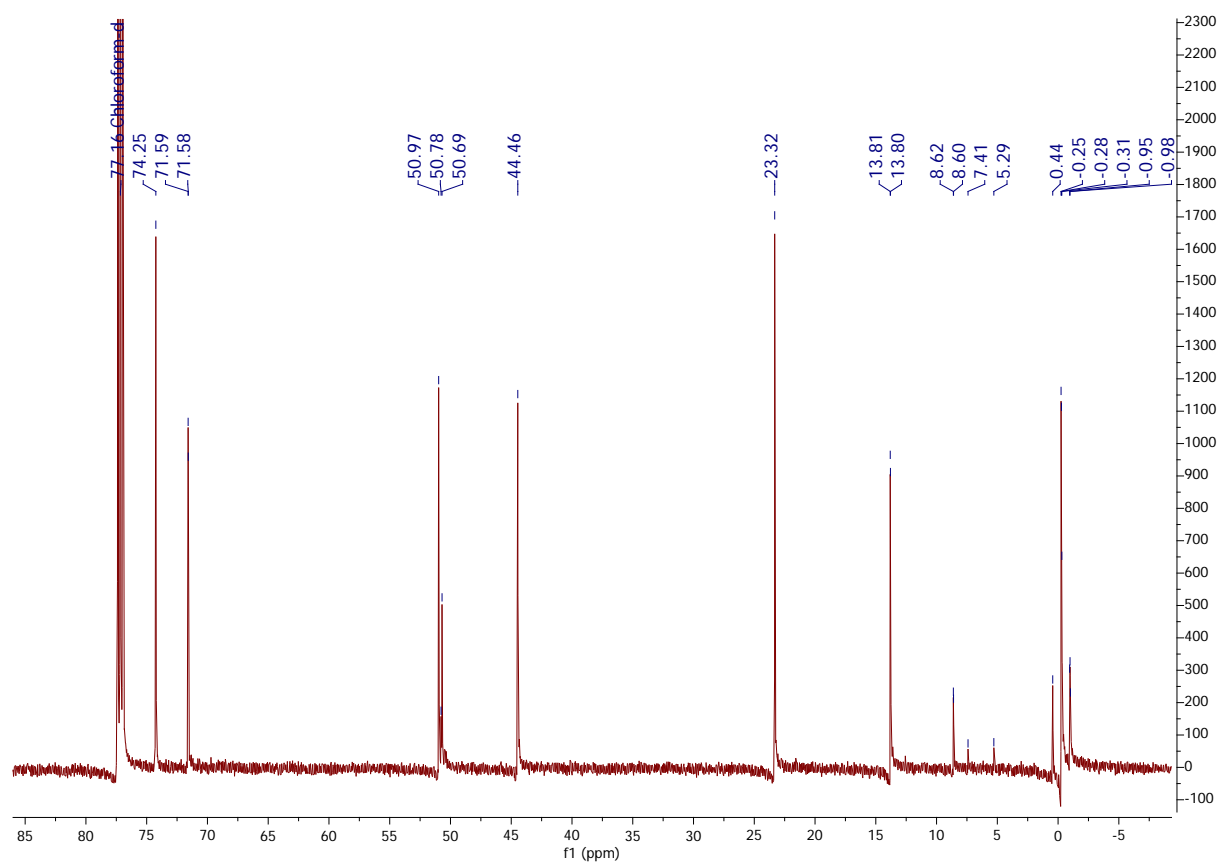 $^{29}\text{Si}$  NMR

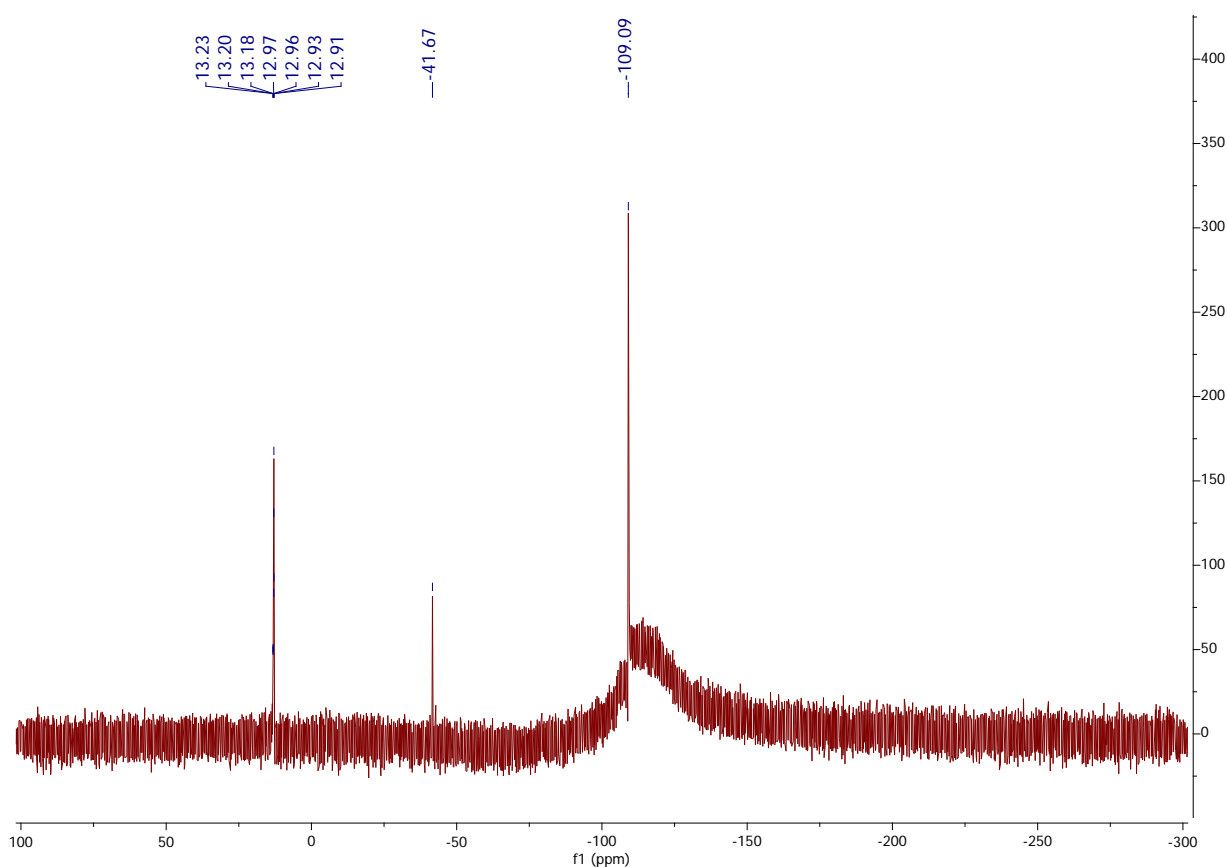

**1,3,5,7,9,11,13,15-penta((3-glycidoxypropyl)dimethylsiloxy)-tri((trimethoxysilyl)dimethylsiloxy)pentacyclo[9.5.1.1<sup>3,9</sup>.1<sup>5,15</sup>.1<sup>7,13</sup>]octasiloxane (SS-5GP-3TMOS)**

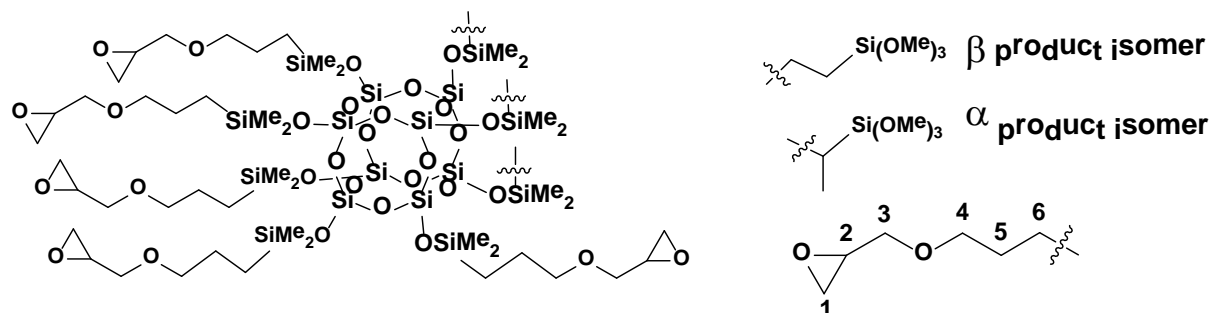

**<sup>1</sup>H NMR** (400 MHz, CDCl<sub>3</sub>):  $\delta$  (ppm) = 3.70-3.66 (m, 5H position 3), 3.54 (s, 27H, OMe), 3.47-3.43 (m, 10H, position 4), 3.39-3.33 (m, 5H, position 3), 3.14-3.09 (m, 5H, position 2), 2.77-2.74 (m, 5H, position 1), 2.59-2.55 (m, 5H, position 1), 1.64-1.63 (m, 10H, position 5), 1.12 (d,  $\alpha$  product -CH<sub>3</sub>), 0.61-0.59 (m, 22H, Si-CH<sub>2</sub>-CH<sub>2</sub>-Si, position 6), 0.14 (s, 48H, SiMe<sub>2</sub>);  $\alpha$  and  $\beta$  isomers were observed in 10 : 90 ratio;

**<sup>13</sup>C NMR** (101 MHz, CDCl<sub>3</sub>):  $\delta$  (ppm) = 73.87, 71.31 (glycidoxy group), 50.61, 50.32 (OMe), 43.99 (propyl-3-CH<sub>2</sub>), 23.06, 13.55 (propyl-1 and propyl-2-CH<sub>2</sub>), 8.36 (Si-CH<sub>2</sub>-CH<sub>2</sub>-Si), 7.14, 5.01 (Si-CH(CH<sub>3</sub>)-Si), 0.17 (Si-CH<sub>2</sub>-CH<sub>2</sub>-Si), -0.54, -0.57, -0.61 (glycidopropyl SiMe<sub>2</sub>), -1.24, -1.27 (trimethoxysilylethyl SiMe<sub>2</sub>);

**<sup>29</sup>Si NMR** (79,5 MHz, CDCl<sub>3</sub>):  $\delta$  (ppm) = 13.17-13.13 (Si-trimethoxysilylethyl), 12.92-12.87 (Si-glycidopropyl), -41.87 (Si(OMe)<sub>3</sub>), -109.12 (core).

**<sup>1</sup>H NMR**

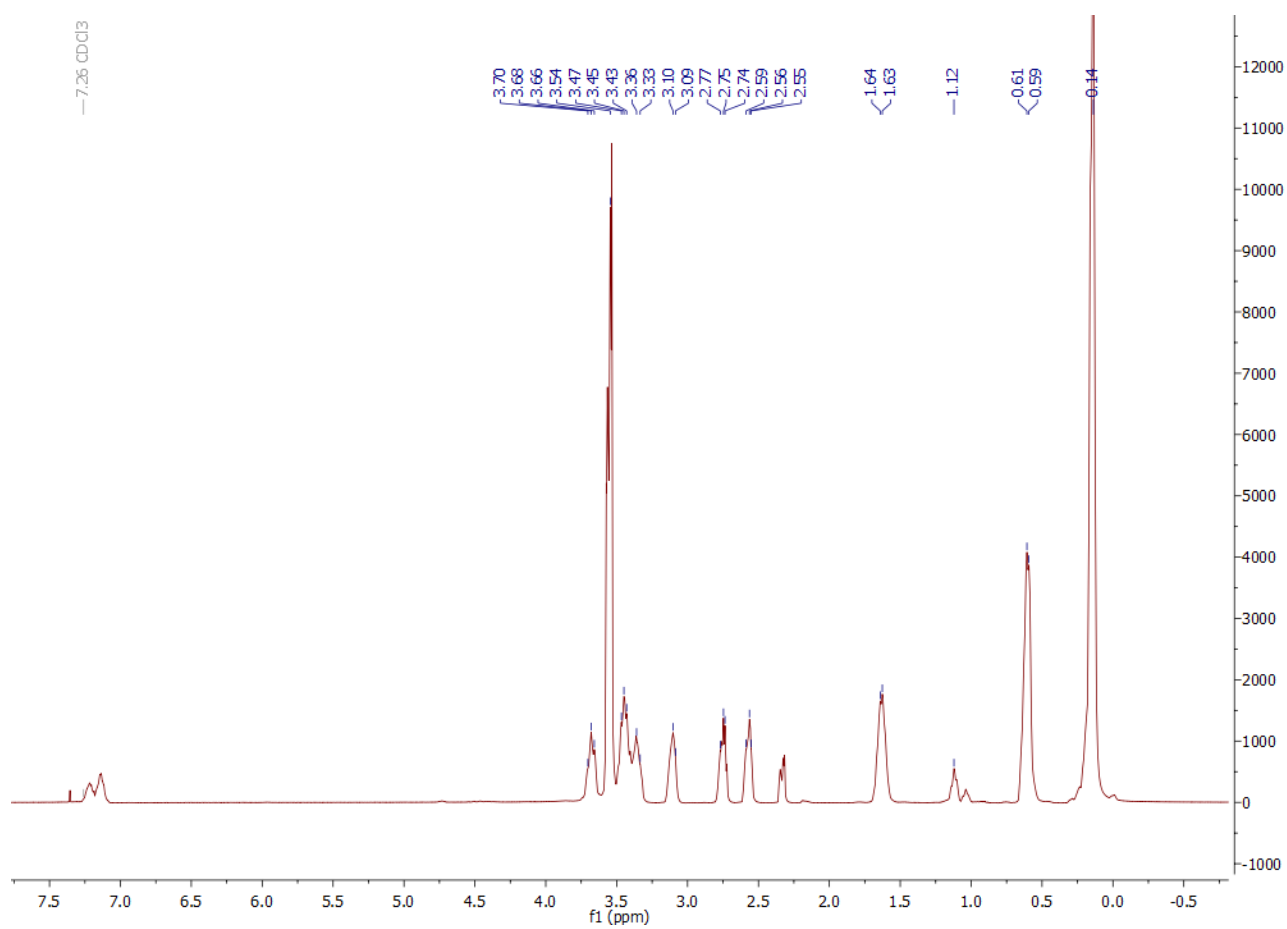

<sup>13</sup>C NMR



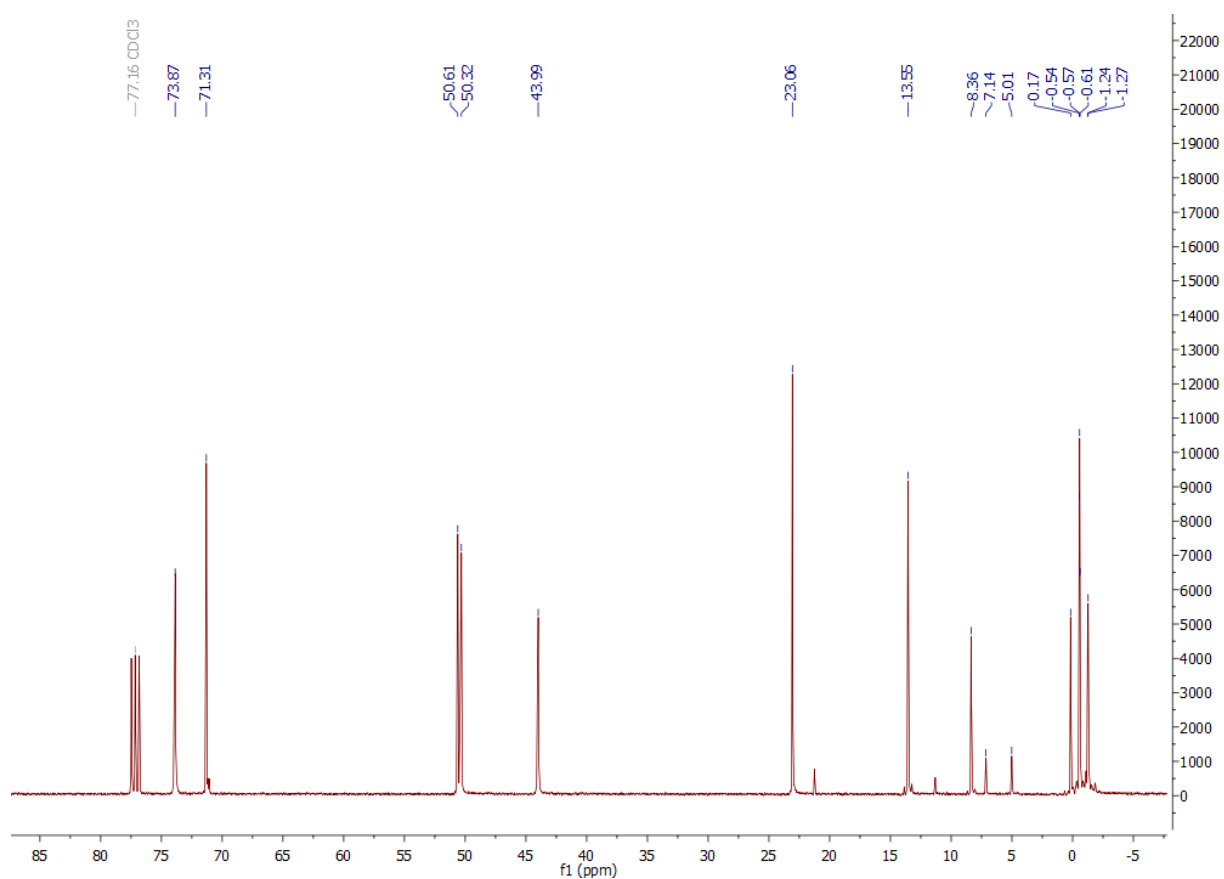 **$^{29}\text{Si}$  NMR**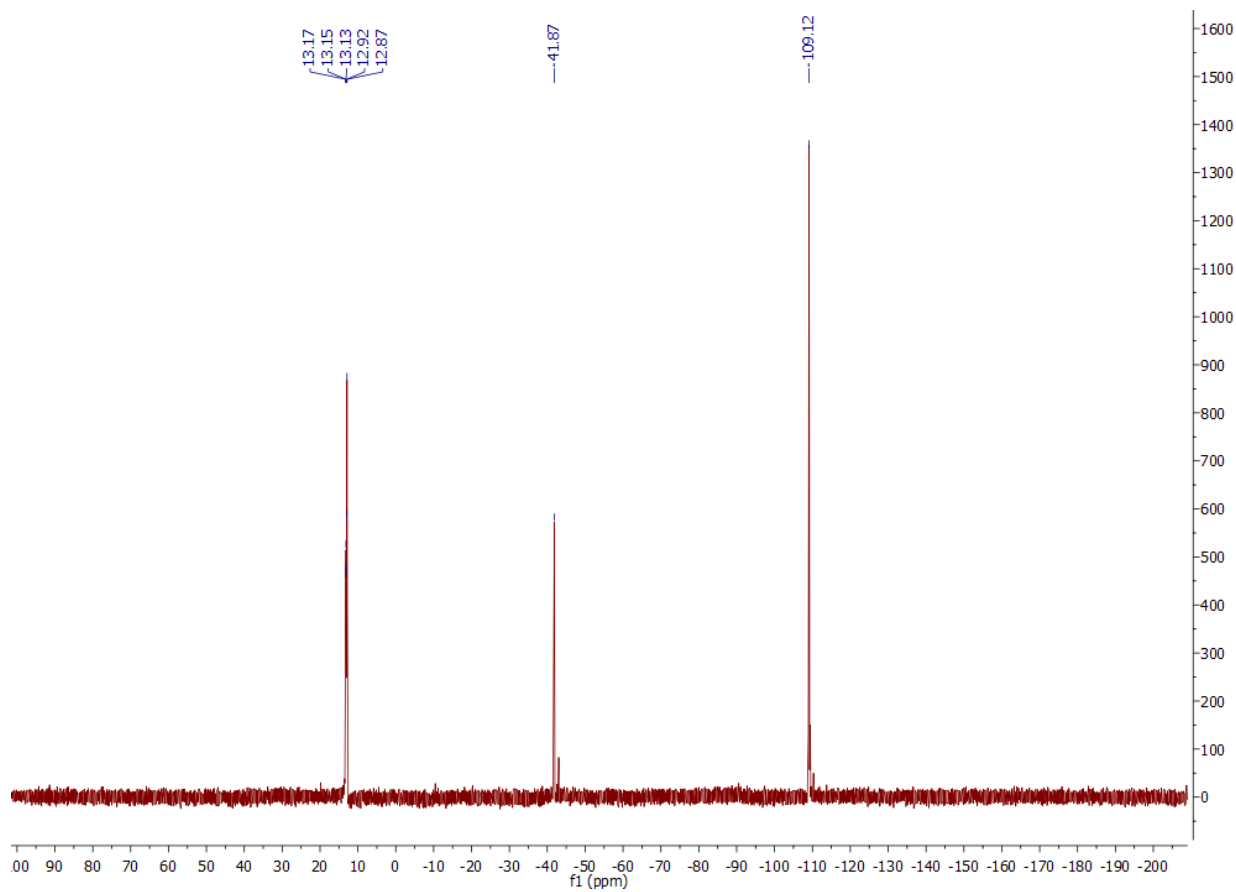

# 1-ethoxy-3,5,7,9,11,13,15-heptaisobutylpentacyclo[9.5.1.1<sup>3,9</sup>.1<sup>5,15</sup>.1<sup>7,13</sup>]octasiloxane (iBu<sub>7</sub>SSQ-OEt)

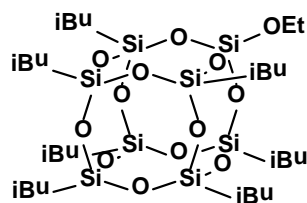

<sup>1</sup>H NMR (400 MHz, CDCl<sub>3</sub>): δ (ppm) = 3.84 (q, J = 7.0 Hz, 2H, OCH<sub>2</sub>CH<sub>3</sub>), 1.92–1.80 (m, 7H, iBu), 1.23 (t, J = 7.0 Hz, 3H, OCH<sub>2</sub>CH<sub>3</sub>), 0.97–0.95 (m, 42H, iBu), 0.64–0.59 (m, 14H, iBu);

<sup>13</sup>C NMR (101 MHz, CDCl<sub>3</sub>): δ (ppm) = 59.48 (OCH<sub>2</sub>CH<sub>3</sub>), 25.85, 25.83, 24.02, 23.98, 22.64, 22.59, 22.51, 22.49 (iBu), 18.03 (OCH<sub>2</sub>CH<sub>3</sub>);

<sup>29</sup>Si NMR (79.5 MHz, CDCl<sub>3</sub>): δ (ppm) = −66.71, −66.94, −67.87 (cage), −103.22 (SiOEt).

## <sup>1</sup>H NMR

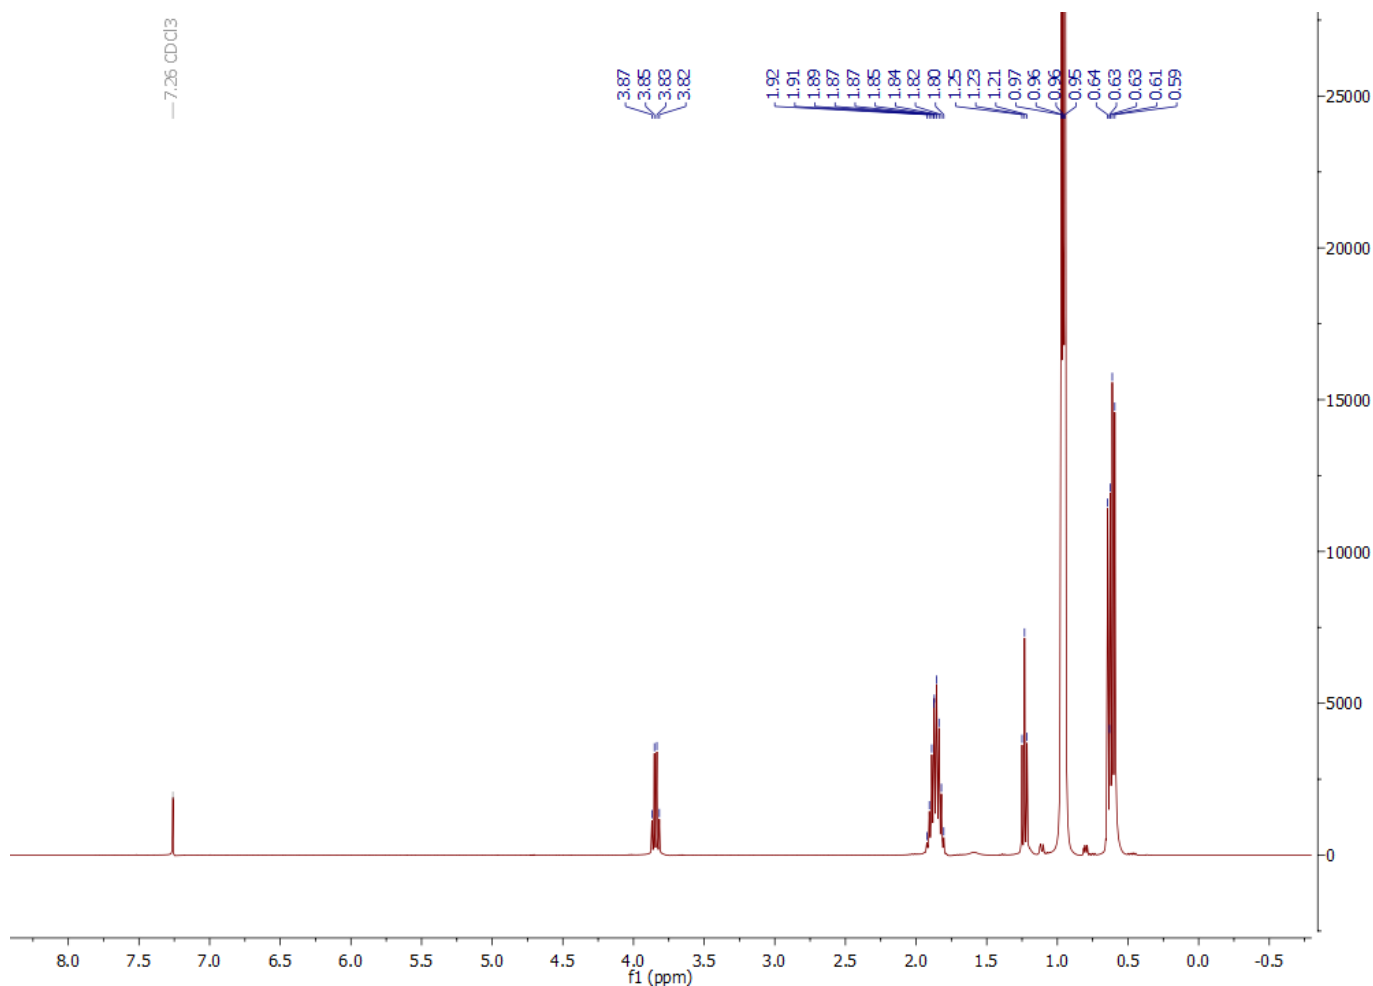

<sup>13</sup>C NMR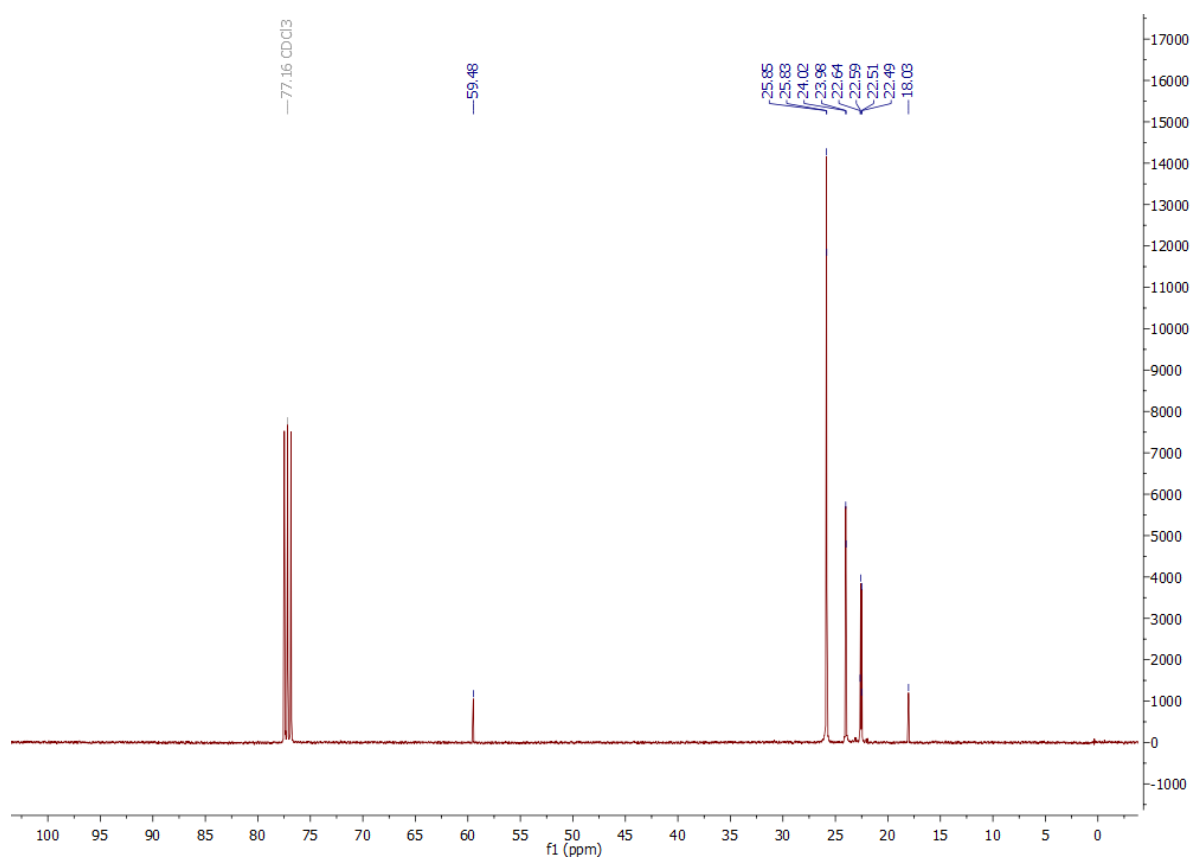<sup>29</sup>Si NMR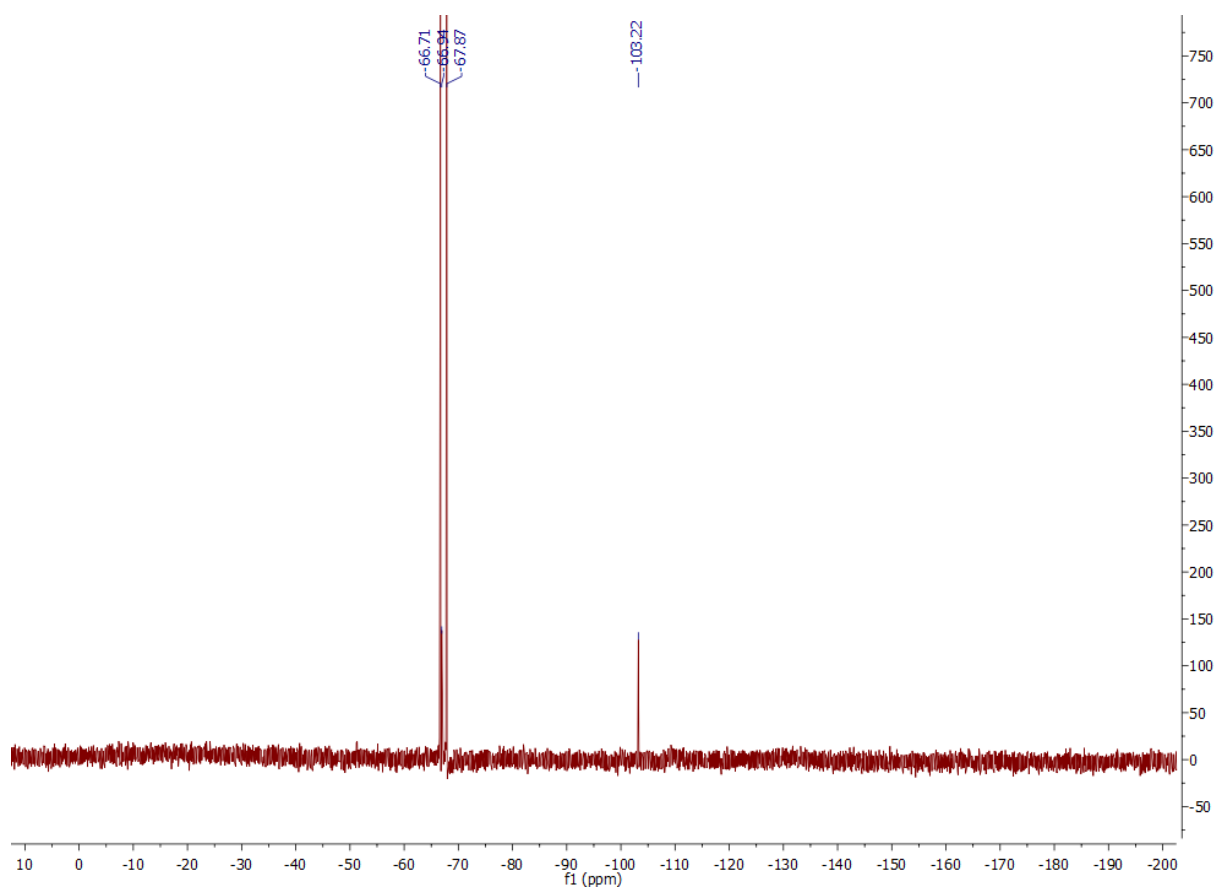

### 3. MALDI-TOF mass spectra of obtained sphaerosilicate compounds

#### SS-6GP-2TMOS

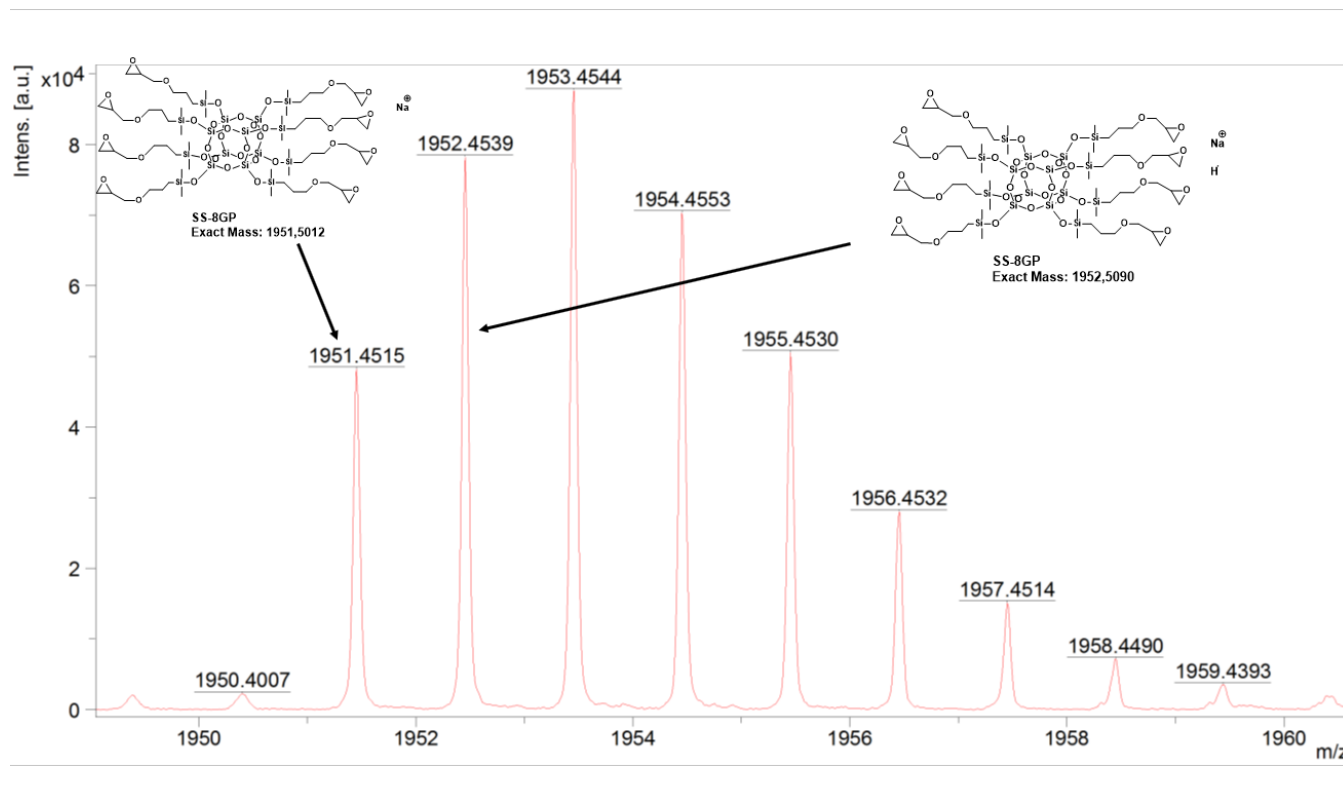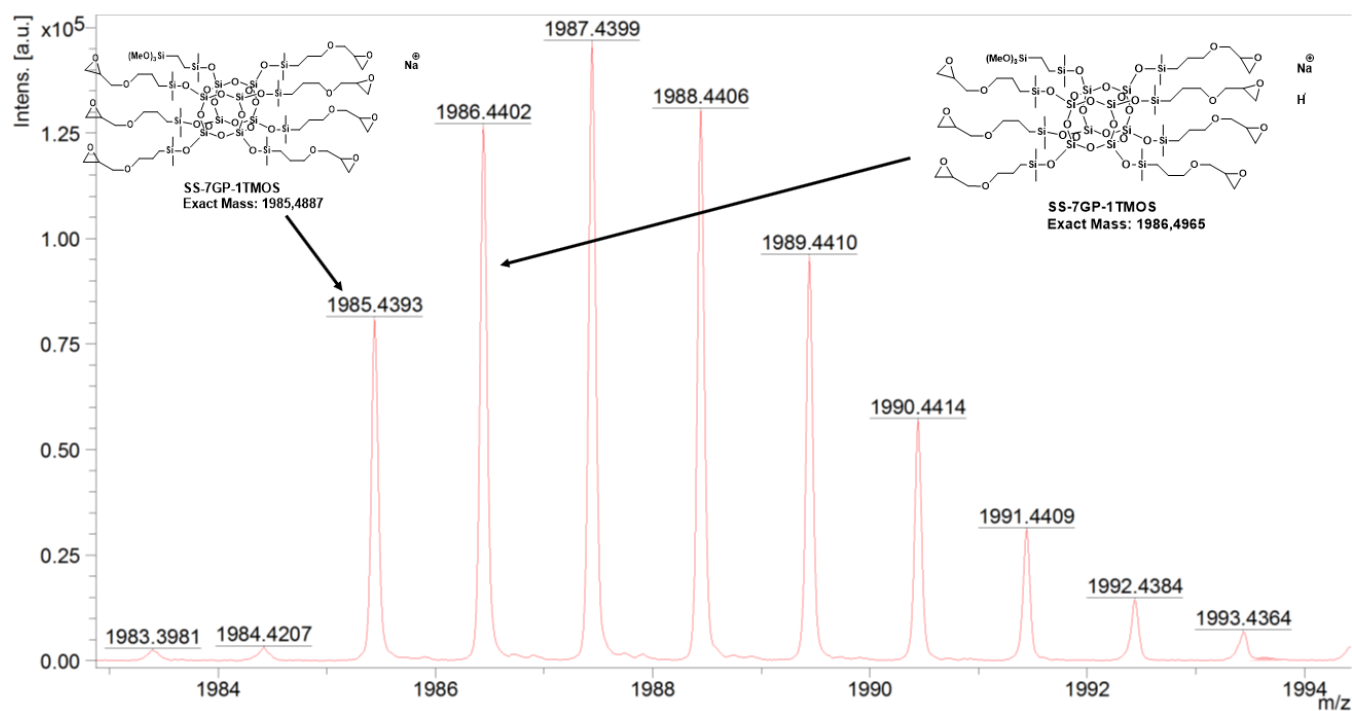



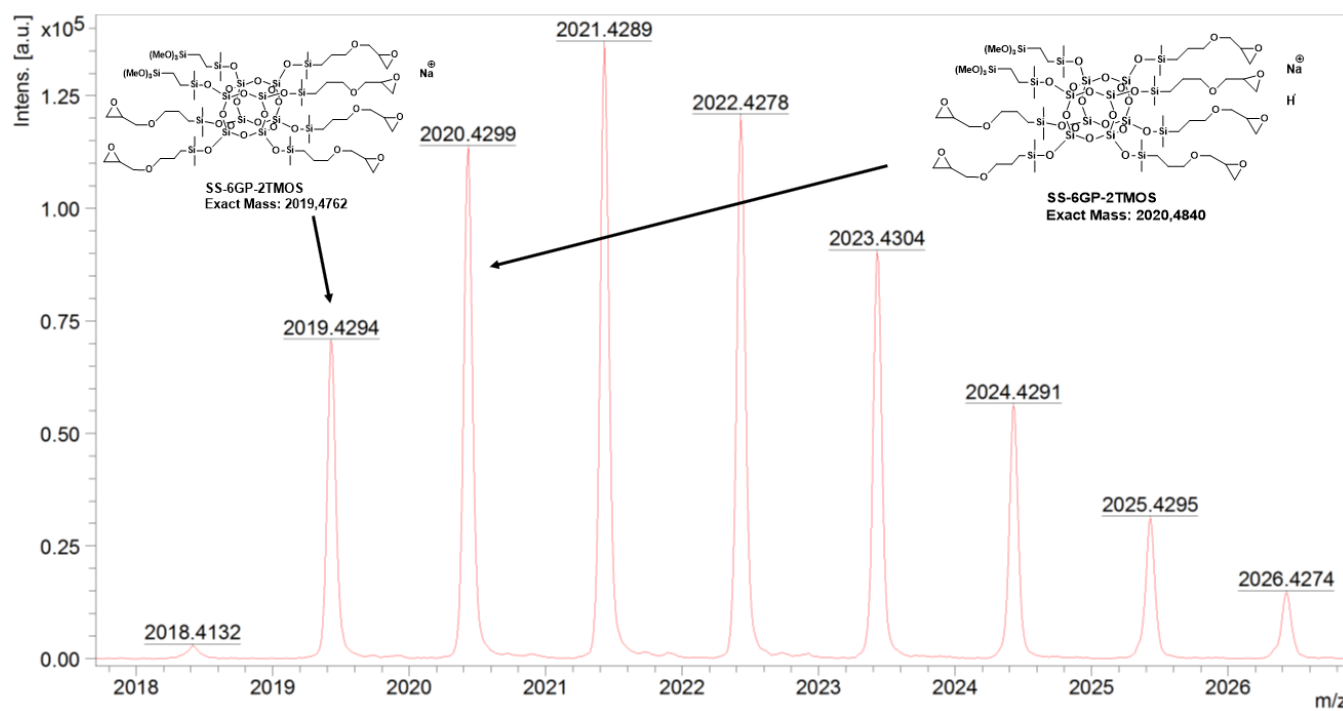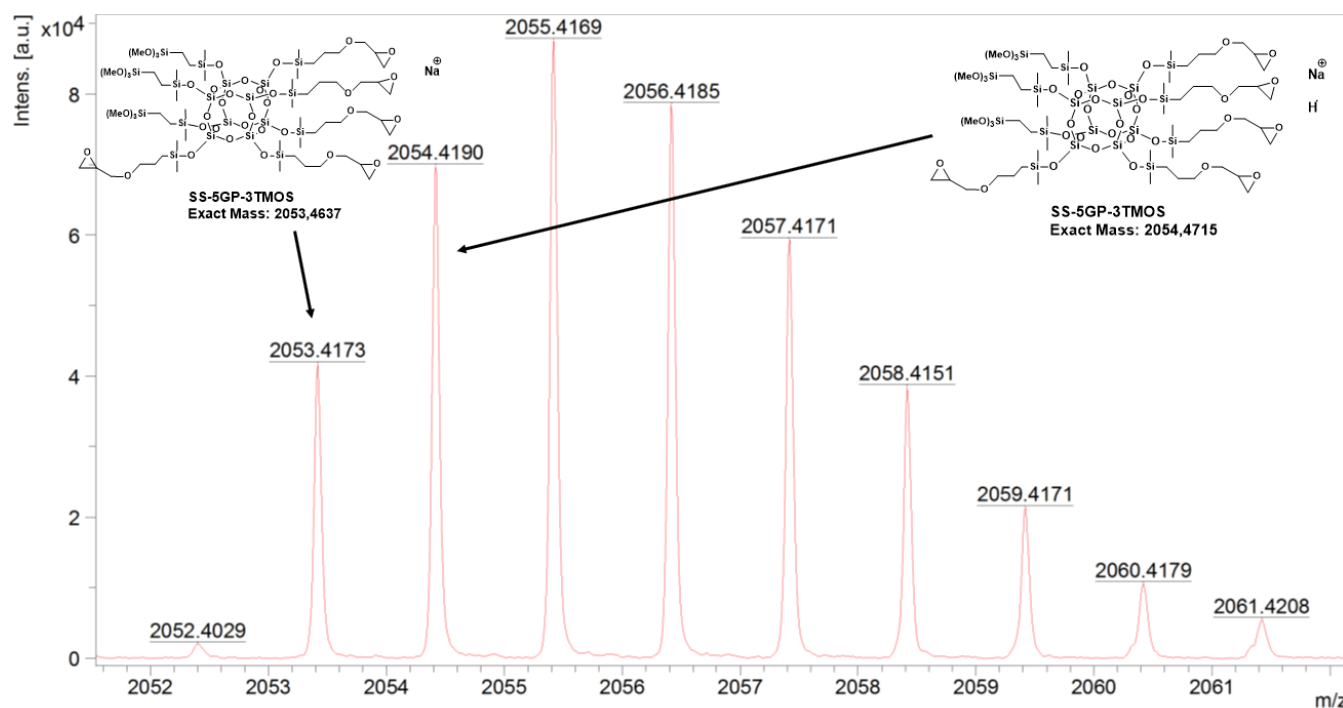

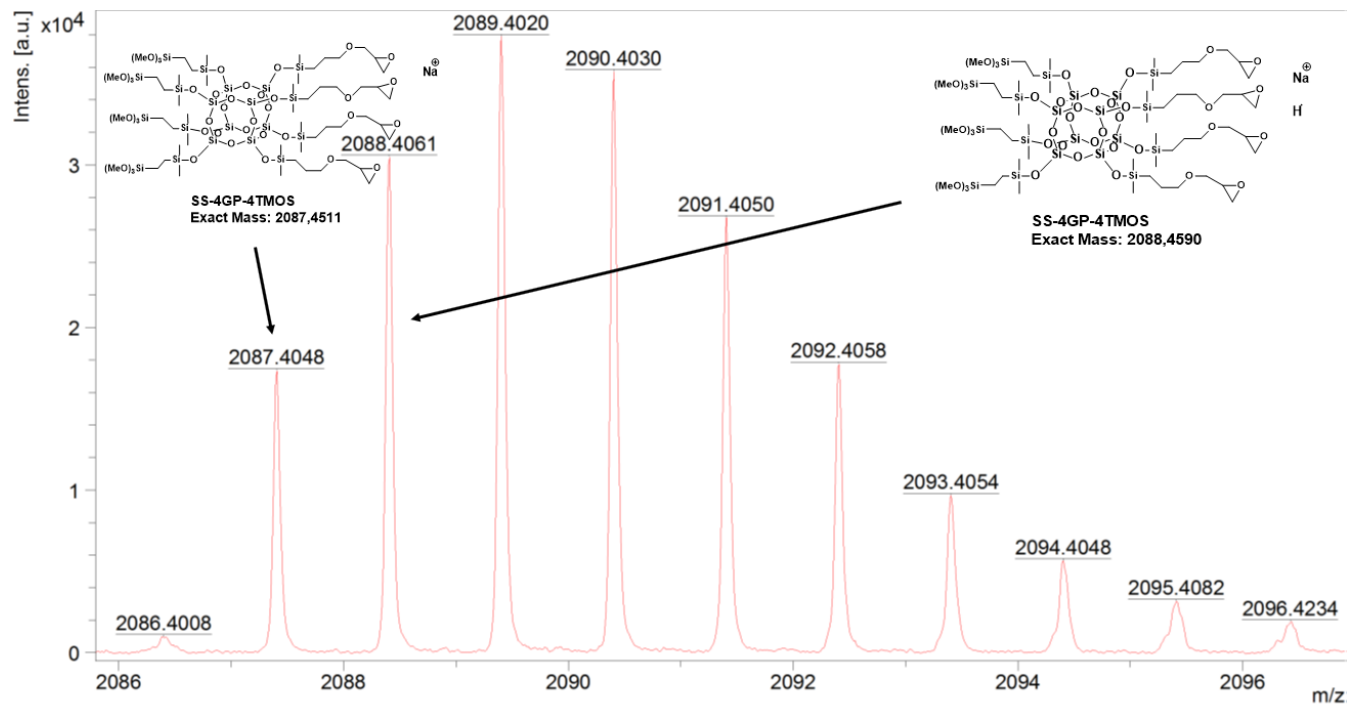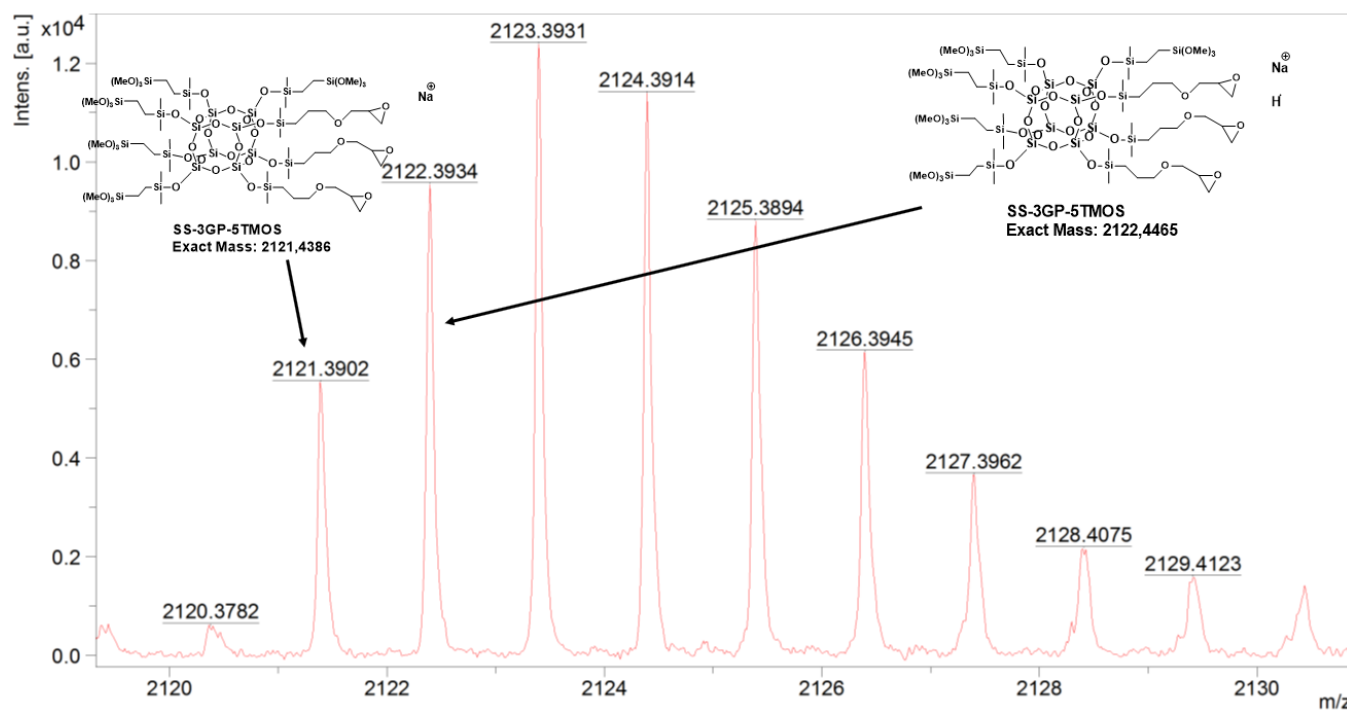

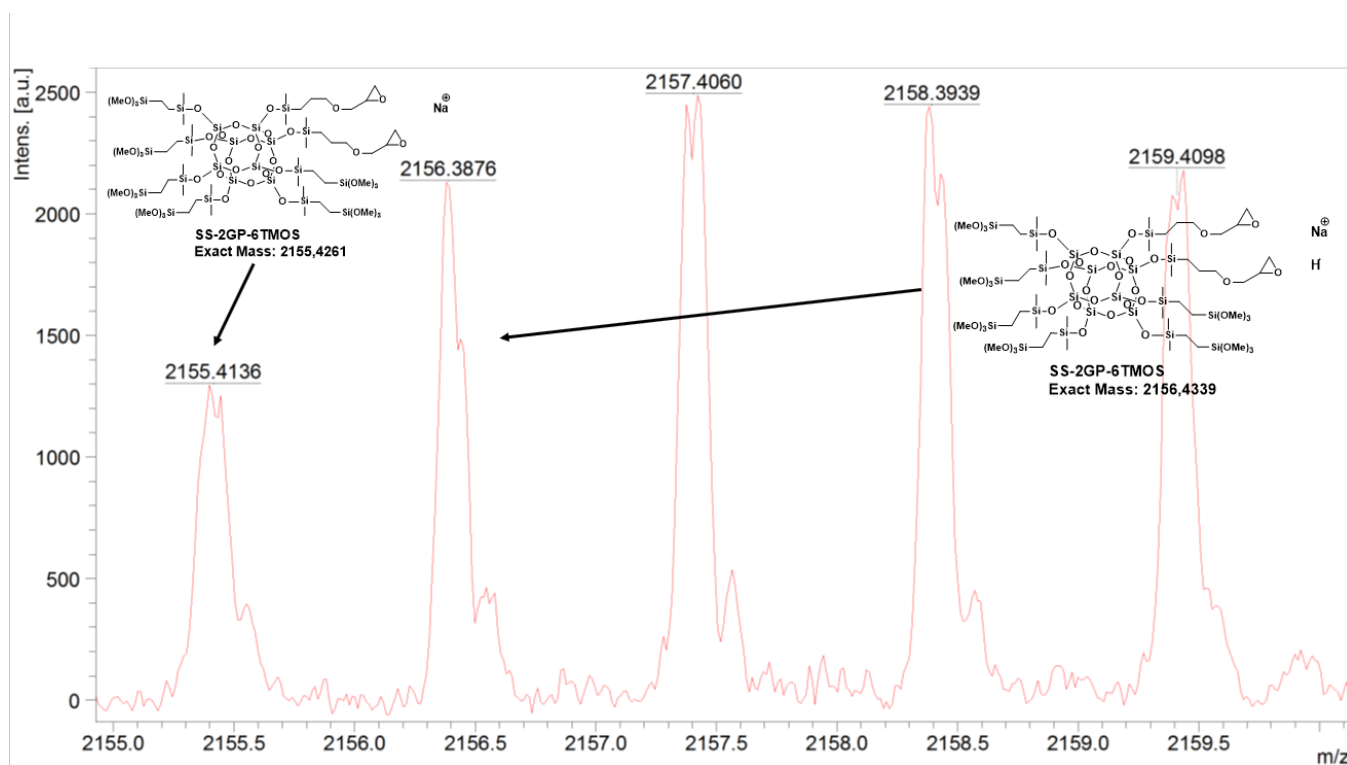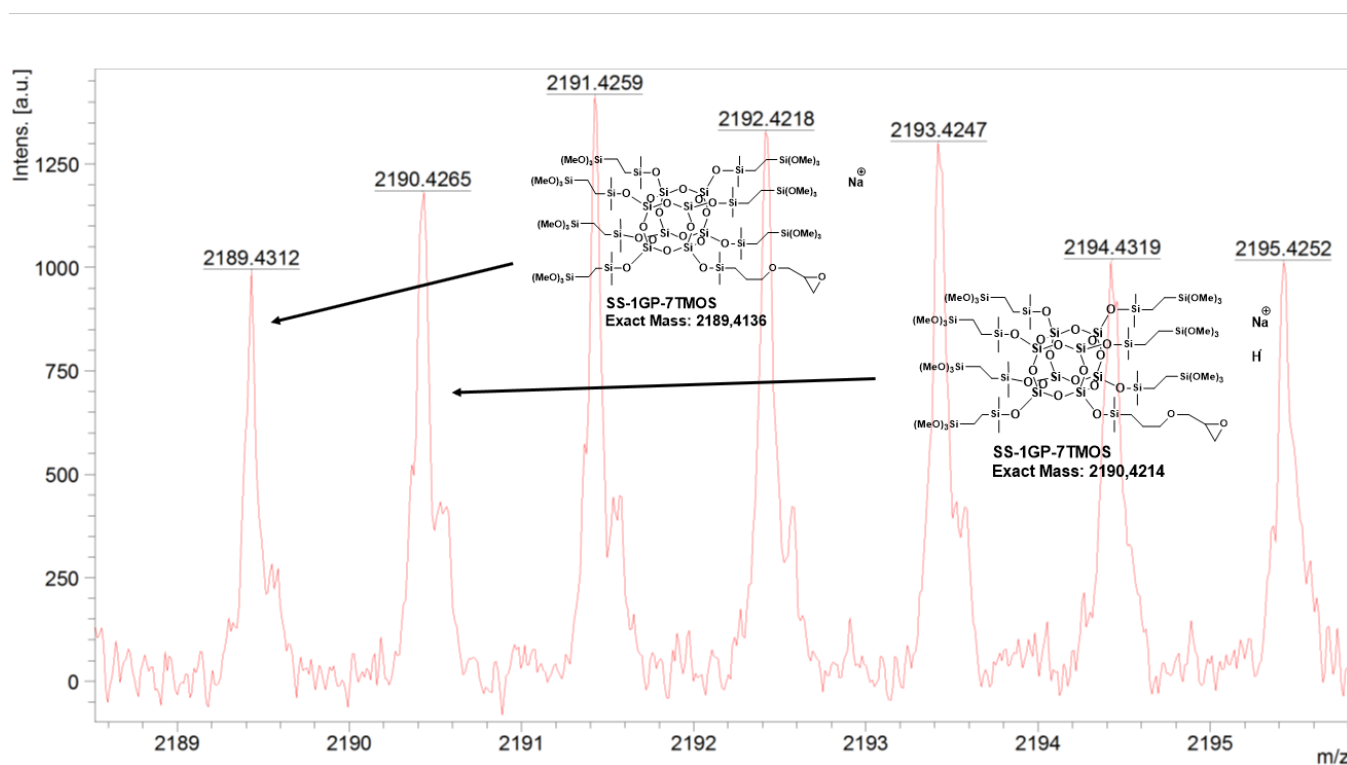

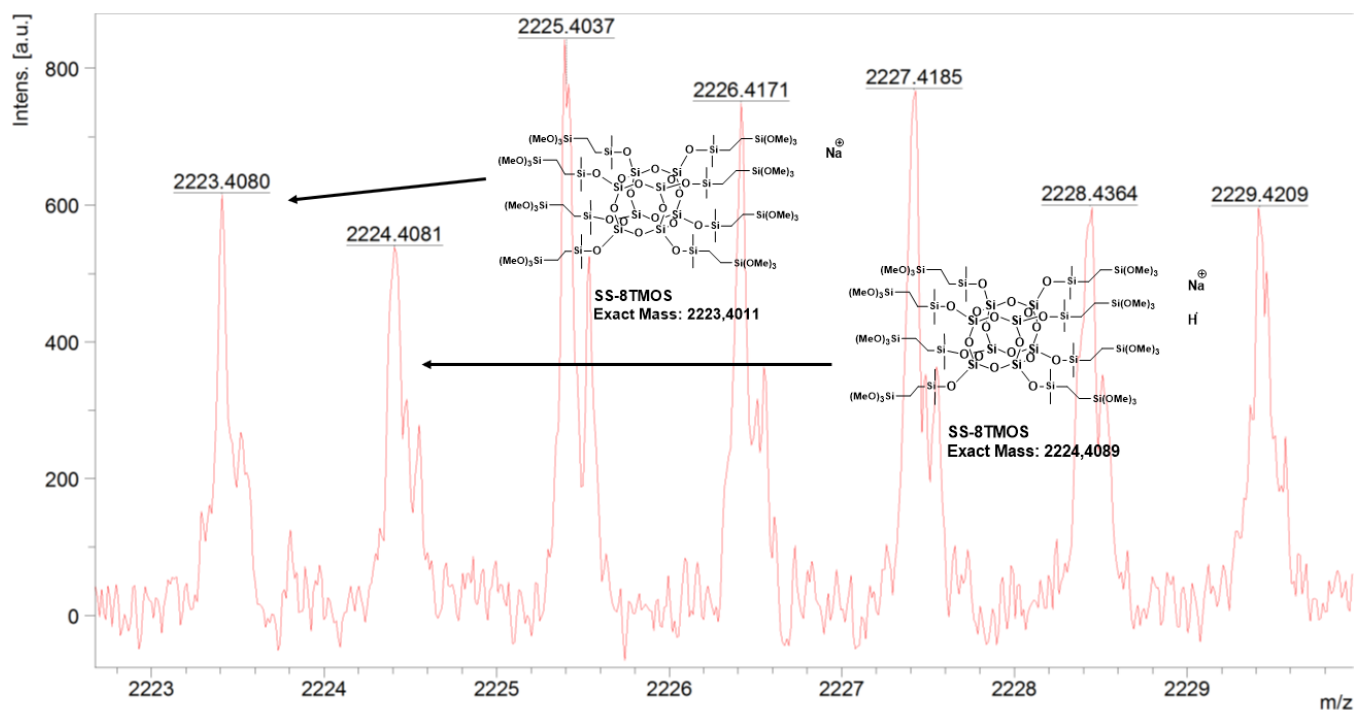



## SS-5GP-3TMOS

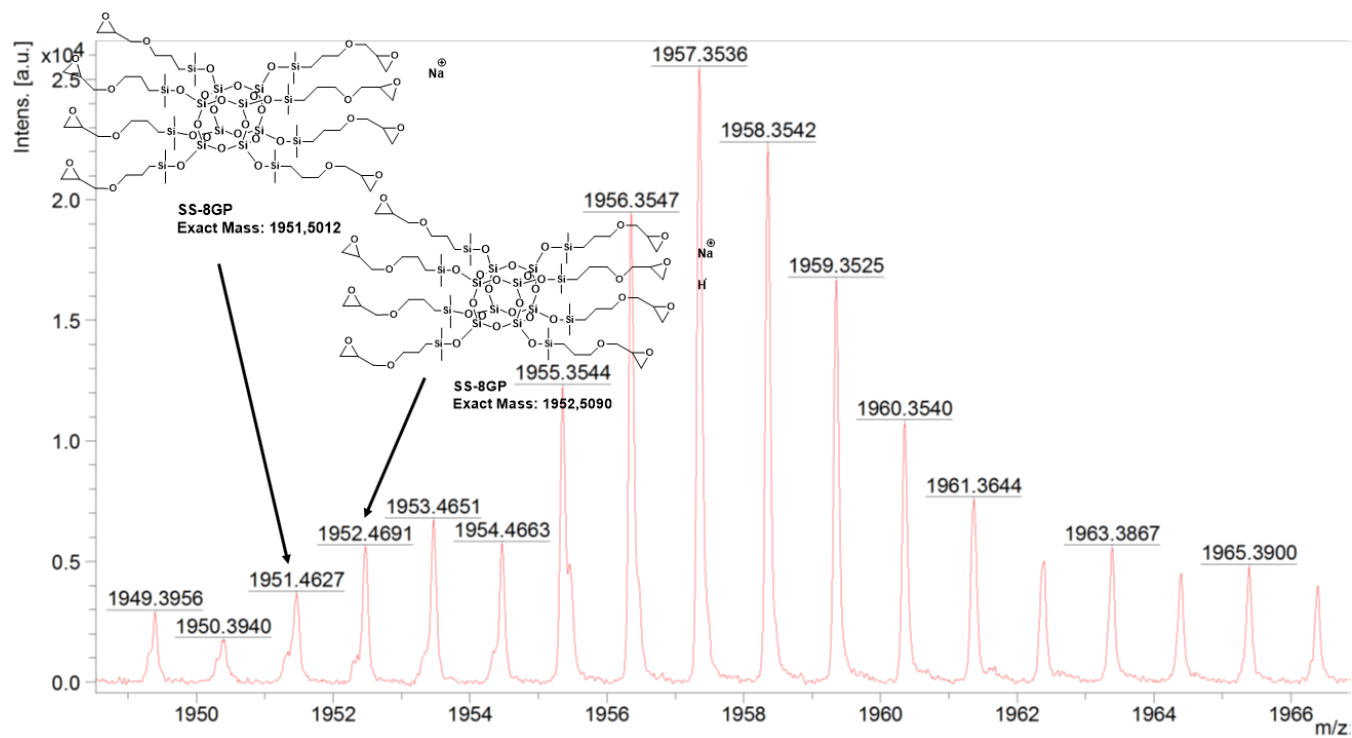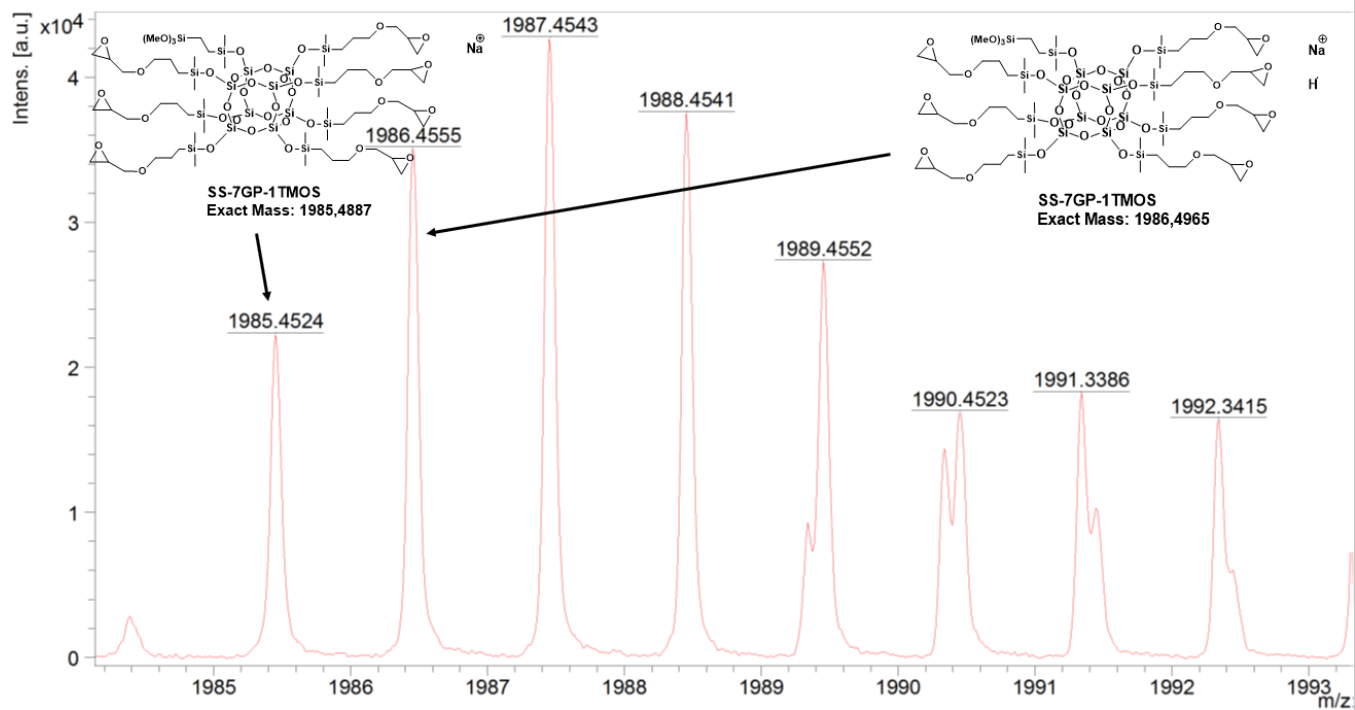

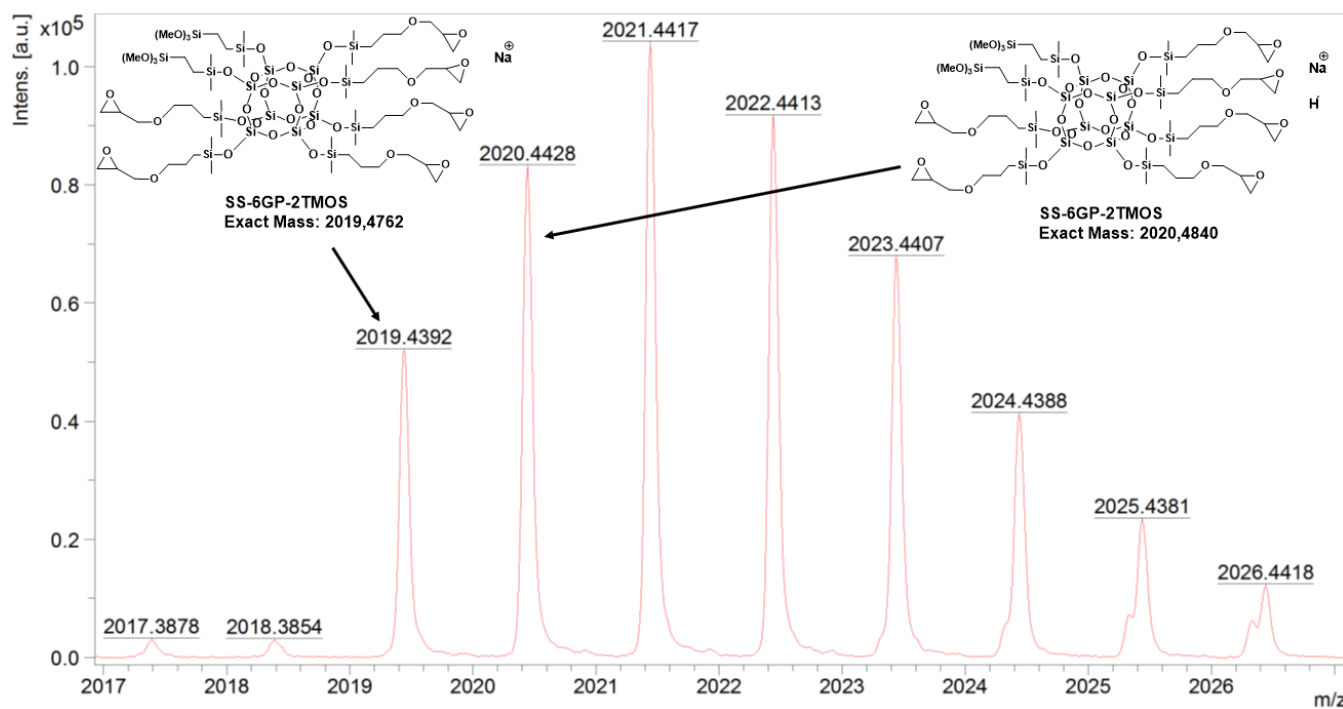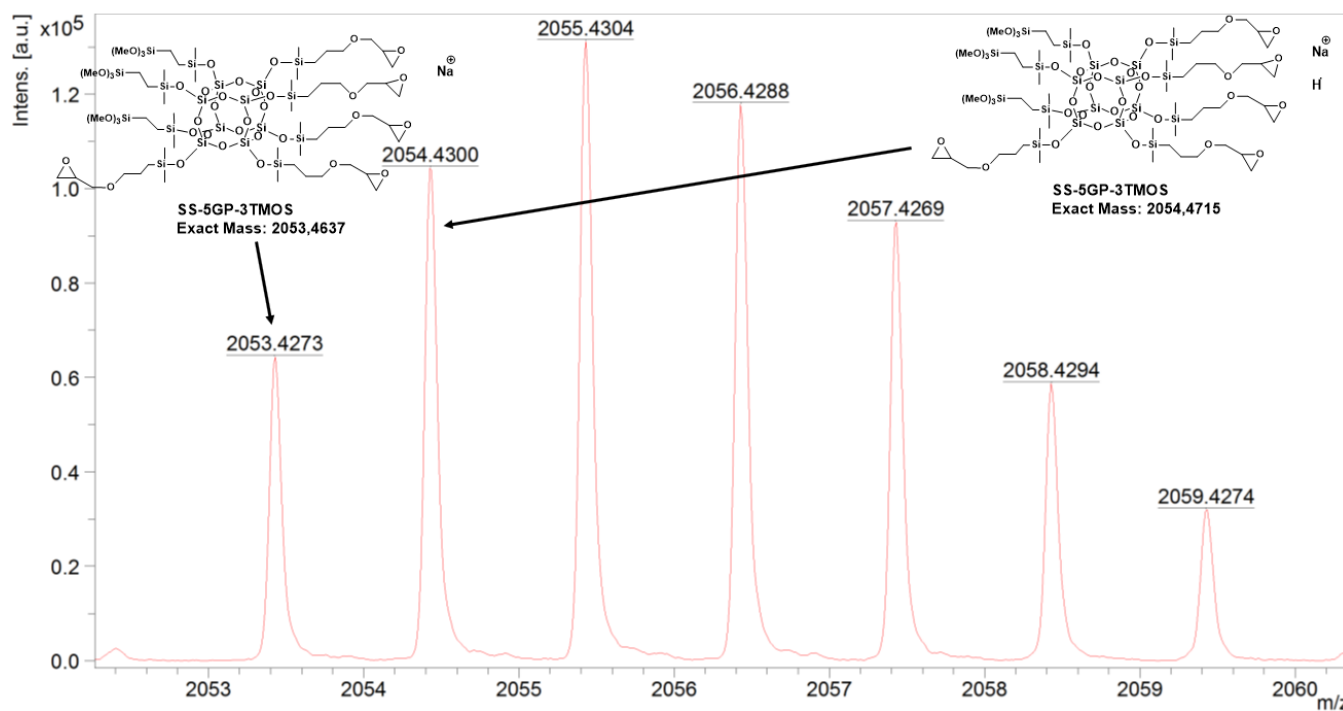

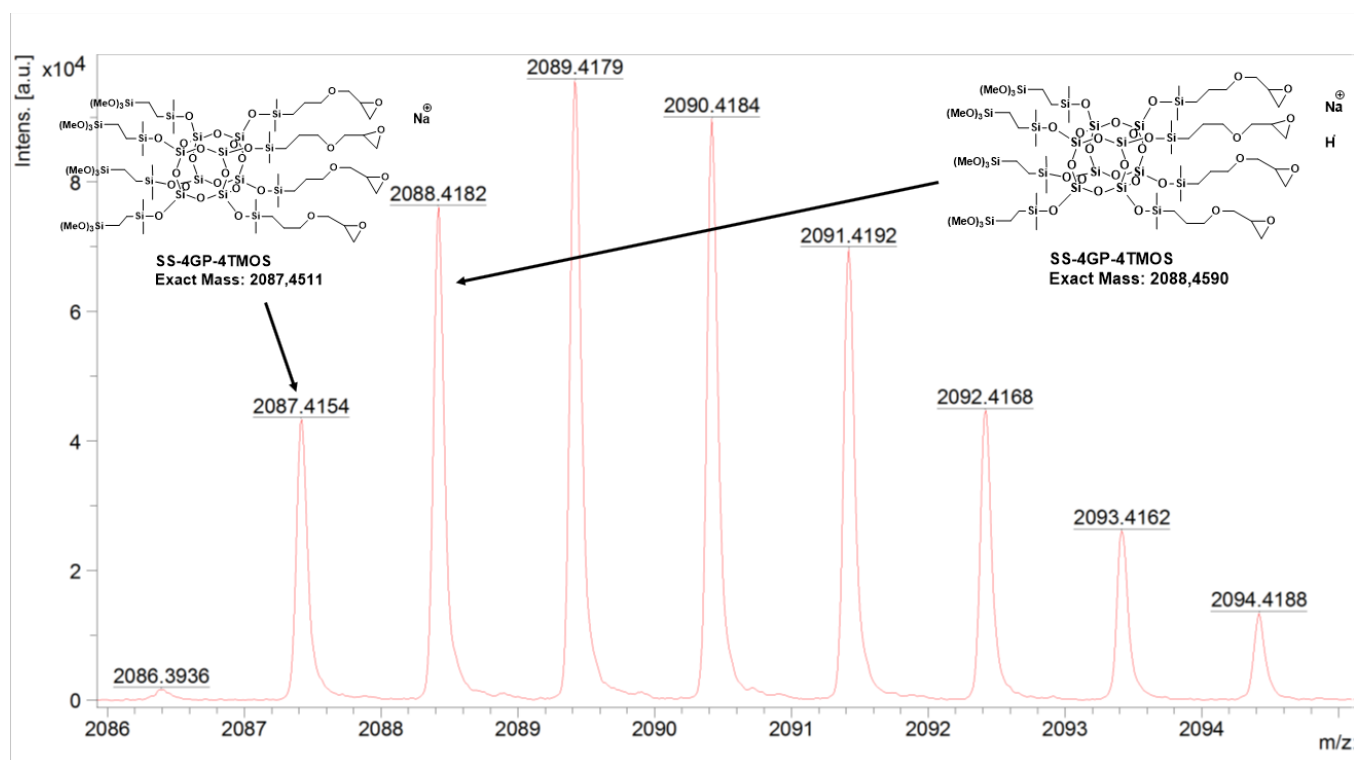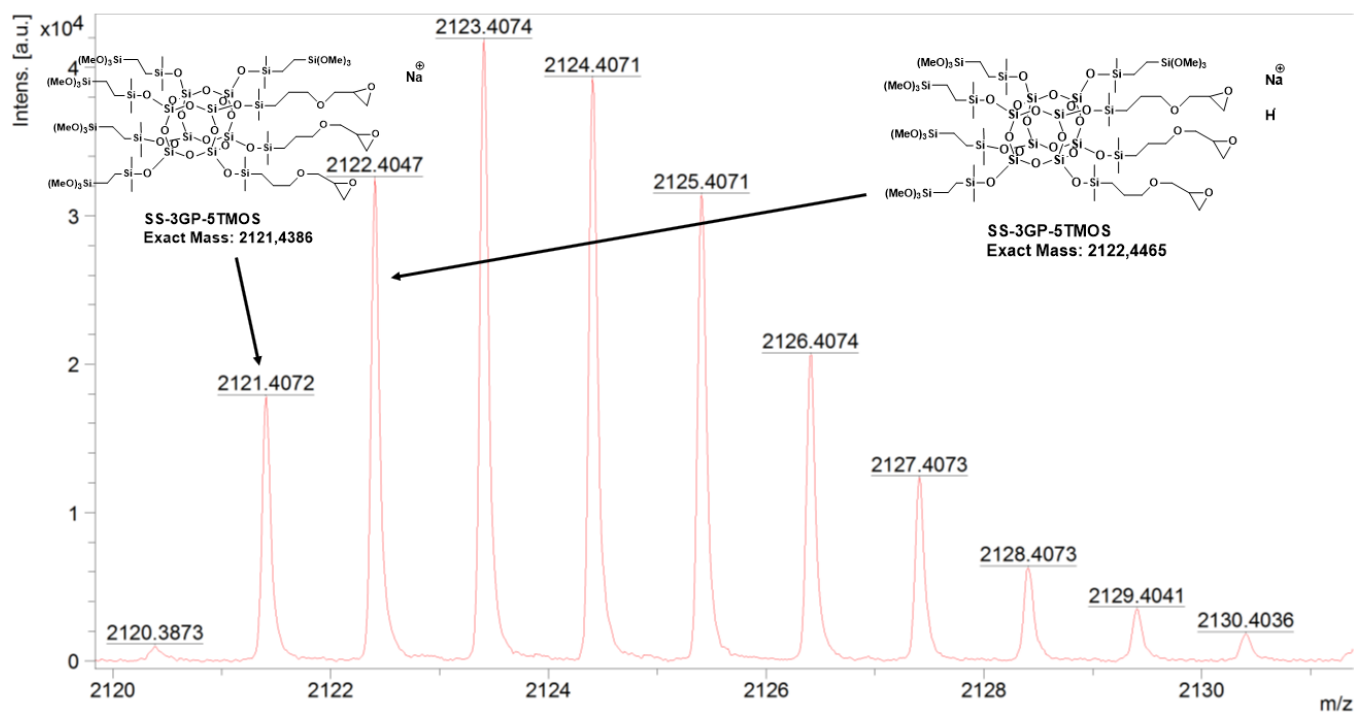

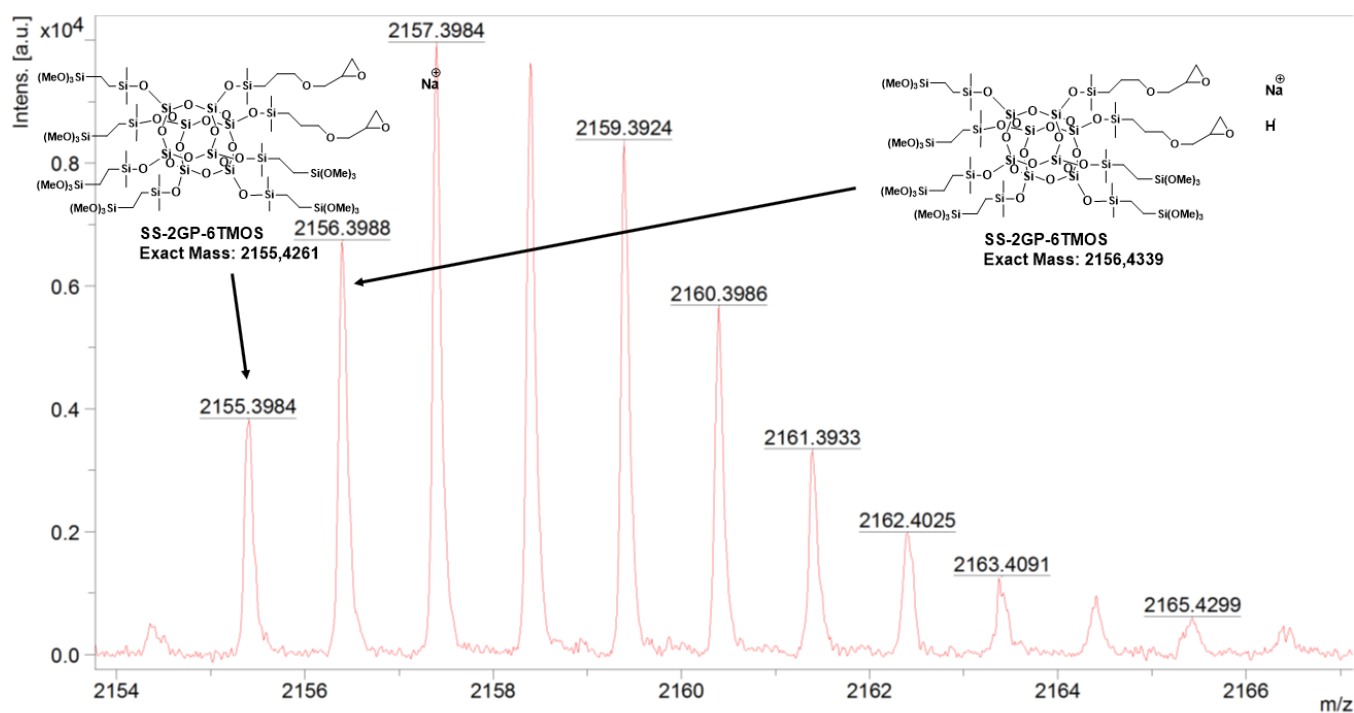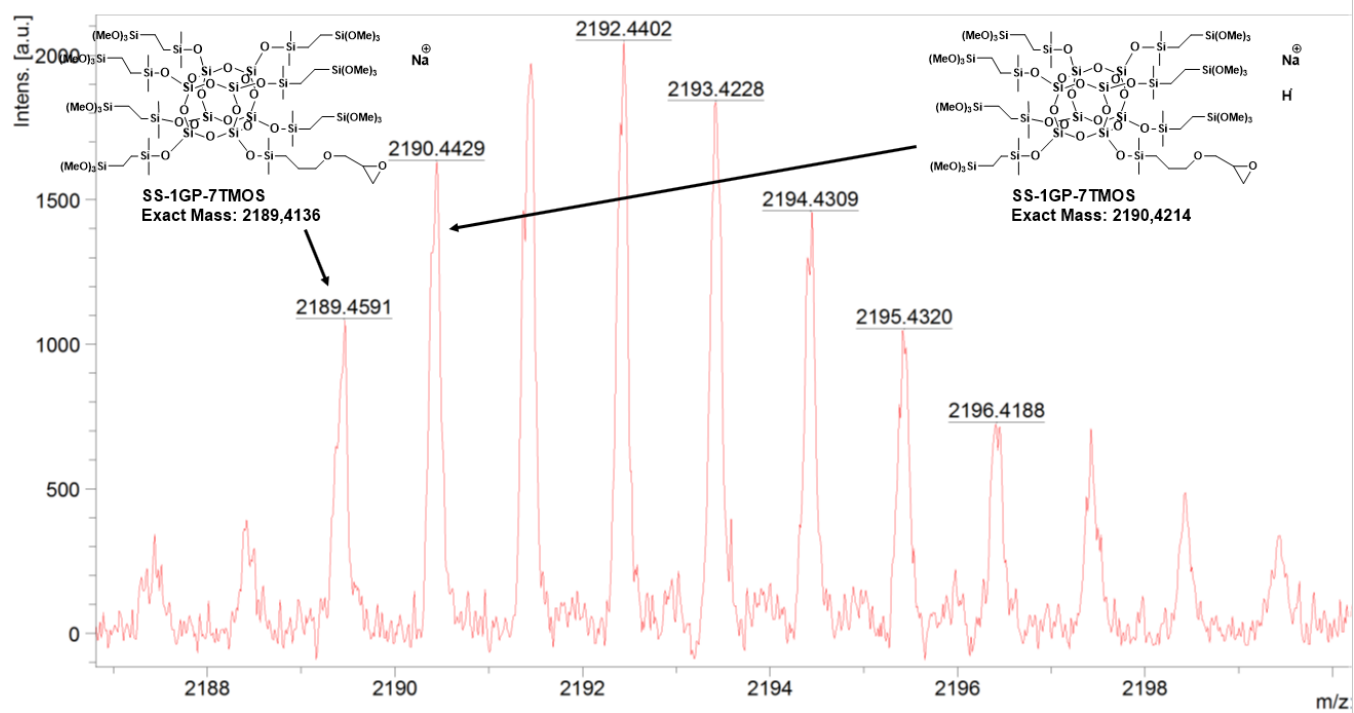



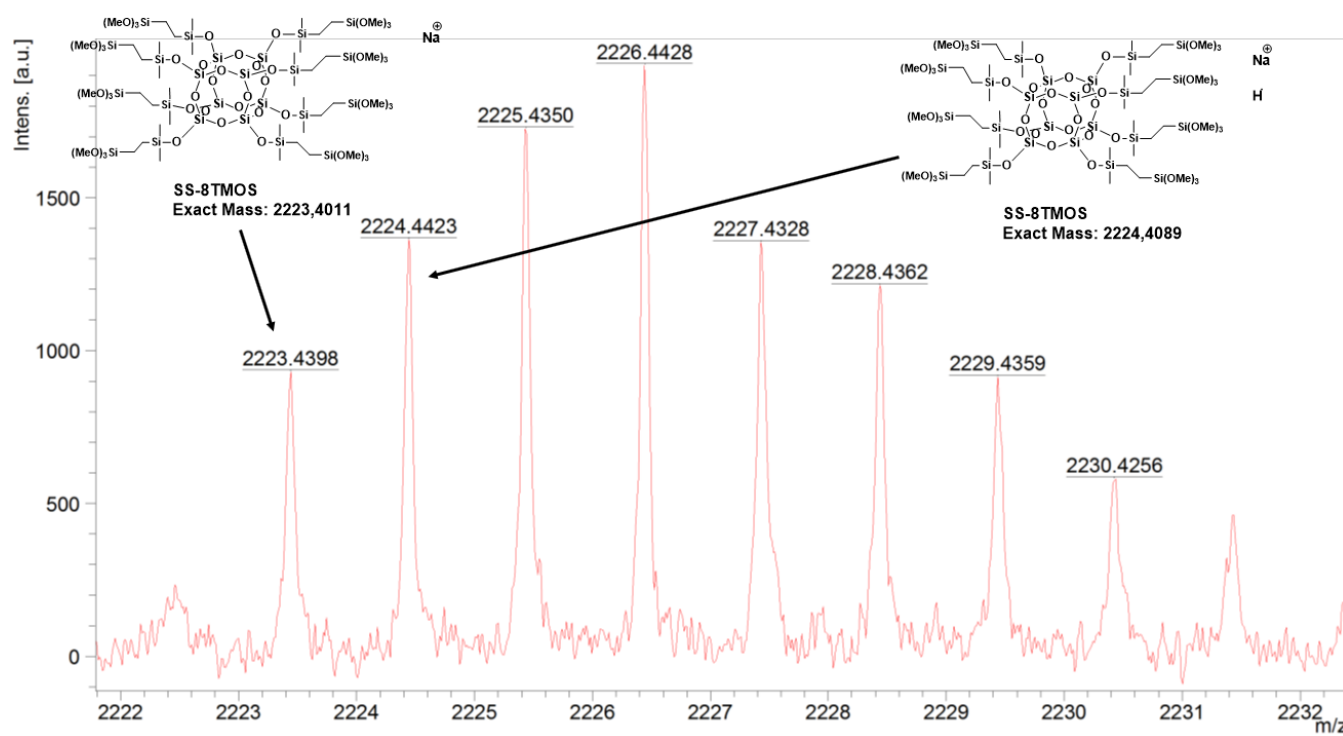

#### 4. SEM images of the TiO<sub>2</sub>/EP composites

##### 1% TiO<sub>2</sub>, unmodified, mechanical stirrer

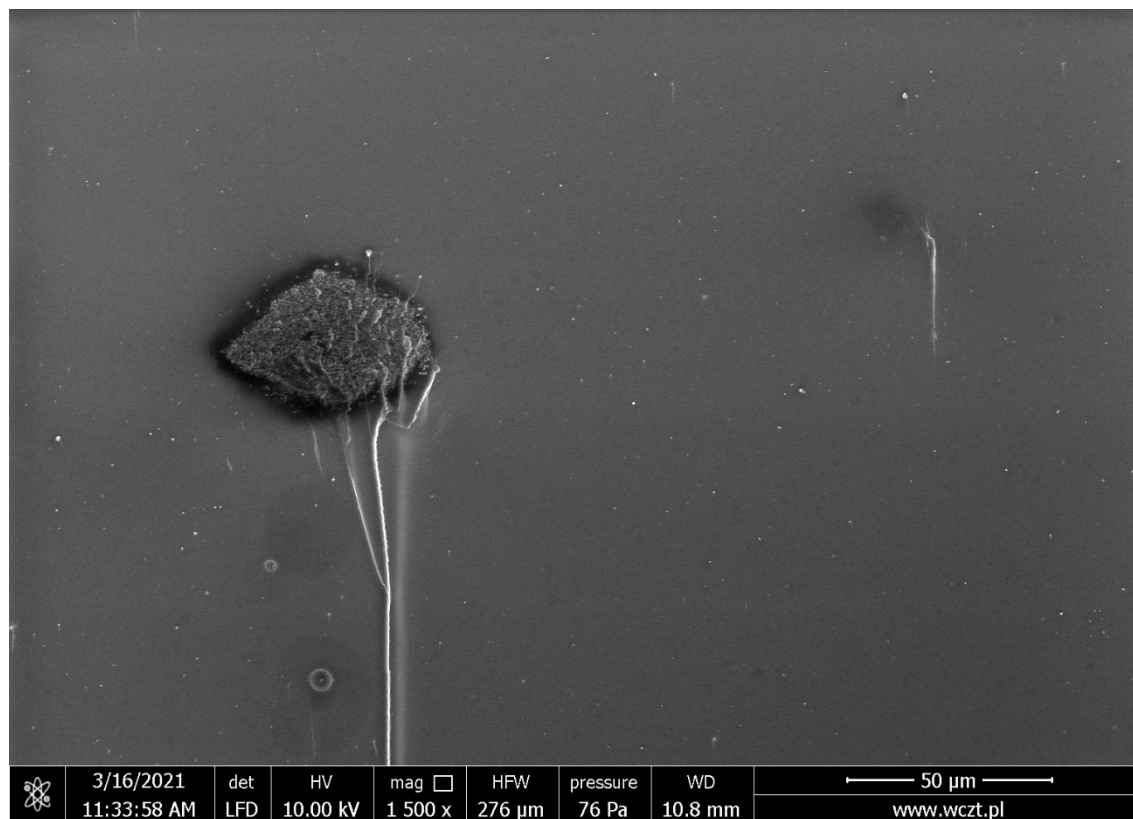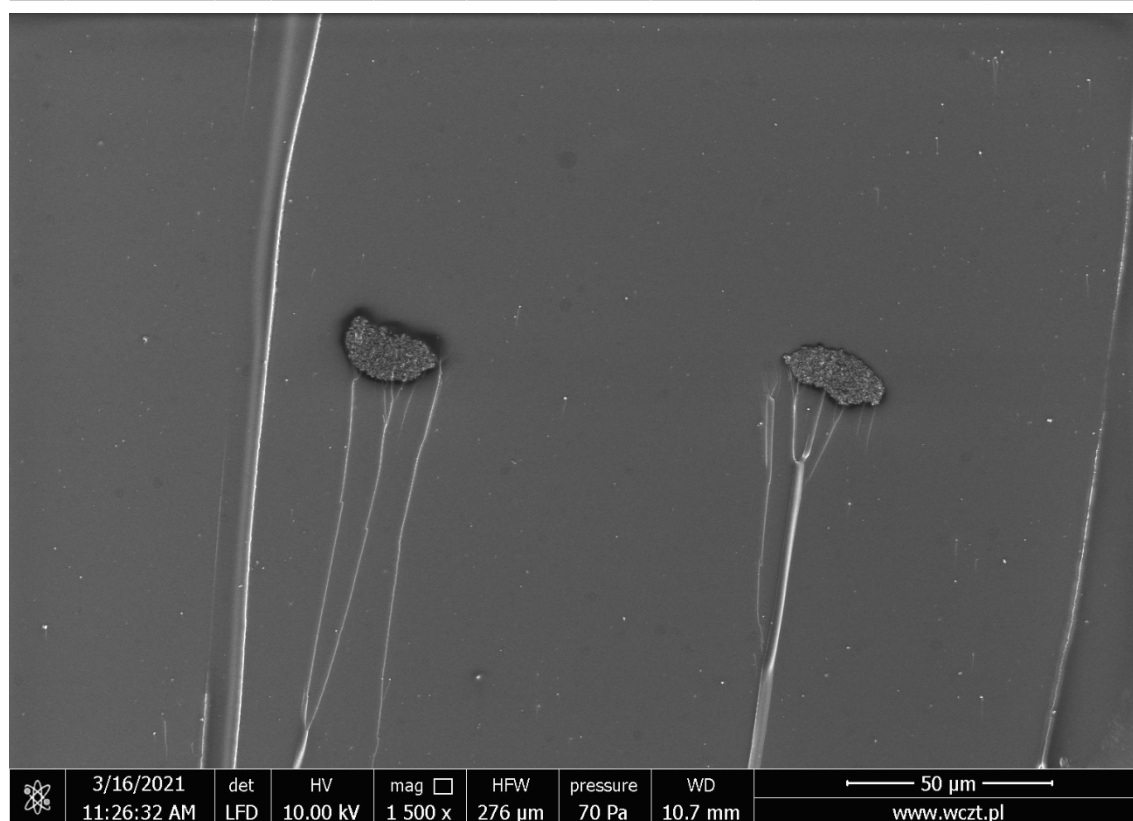

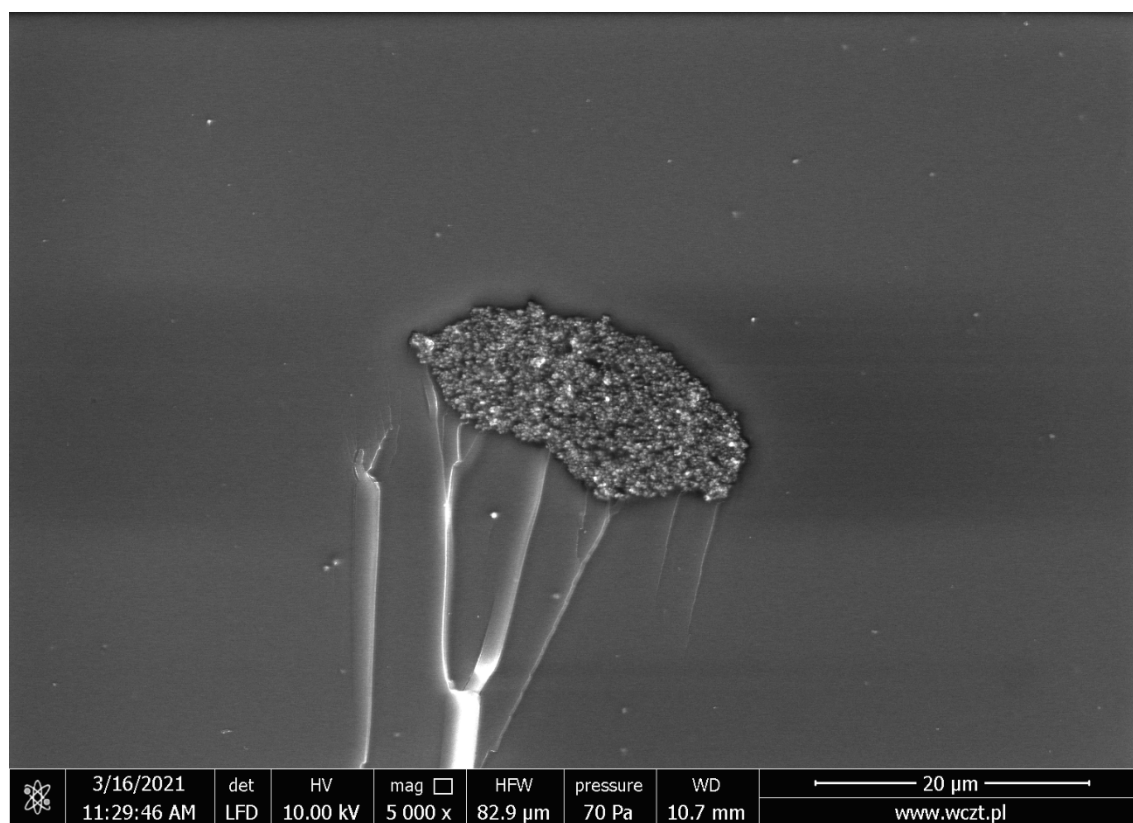

**1% TiO<sub>2</sub>, unmodified, mixing pump**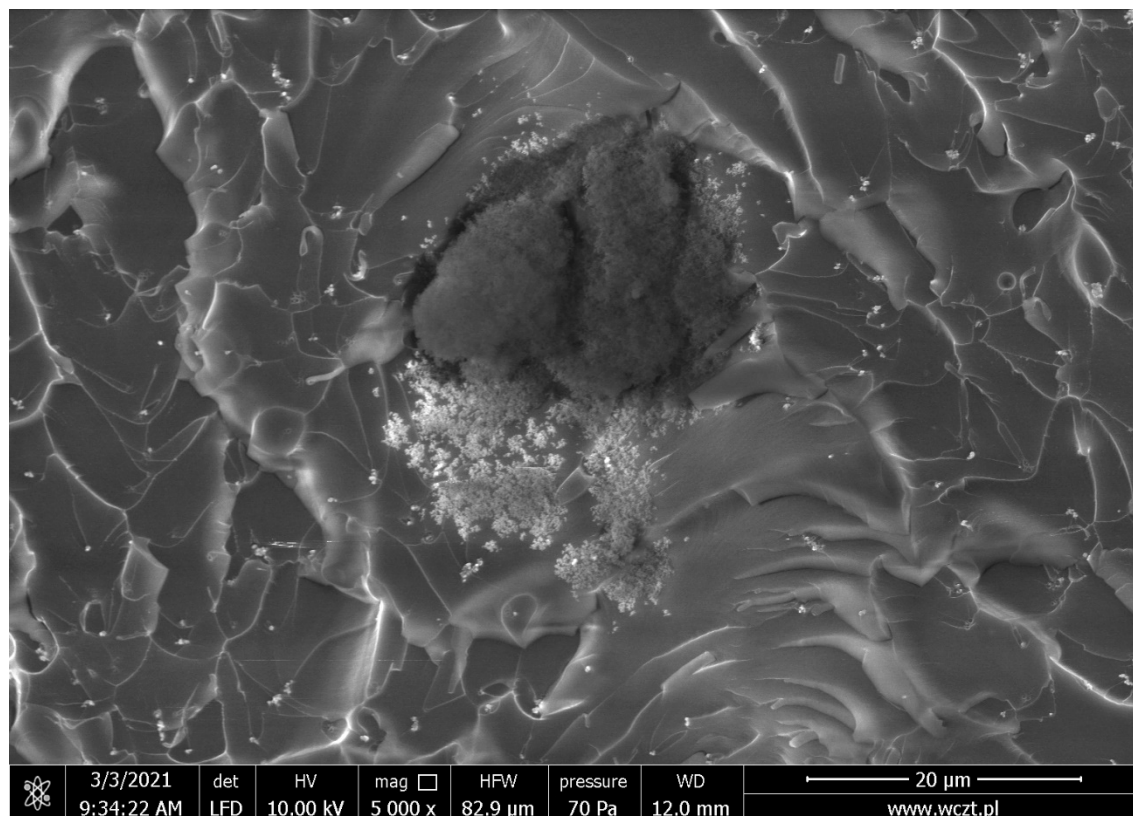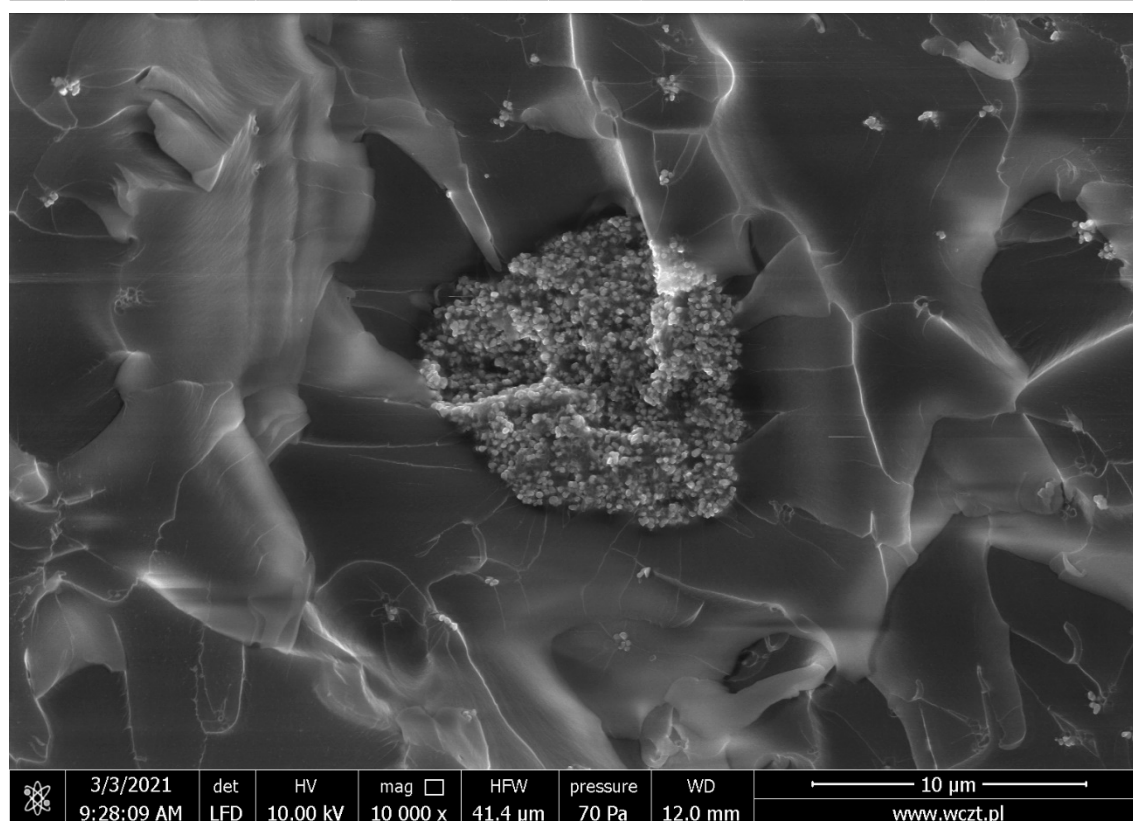

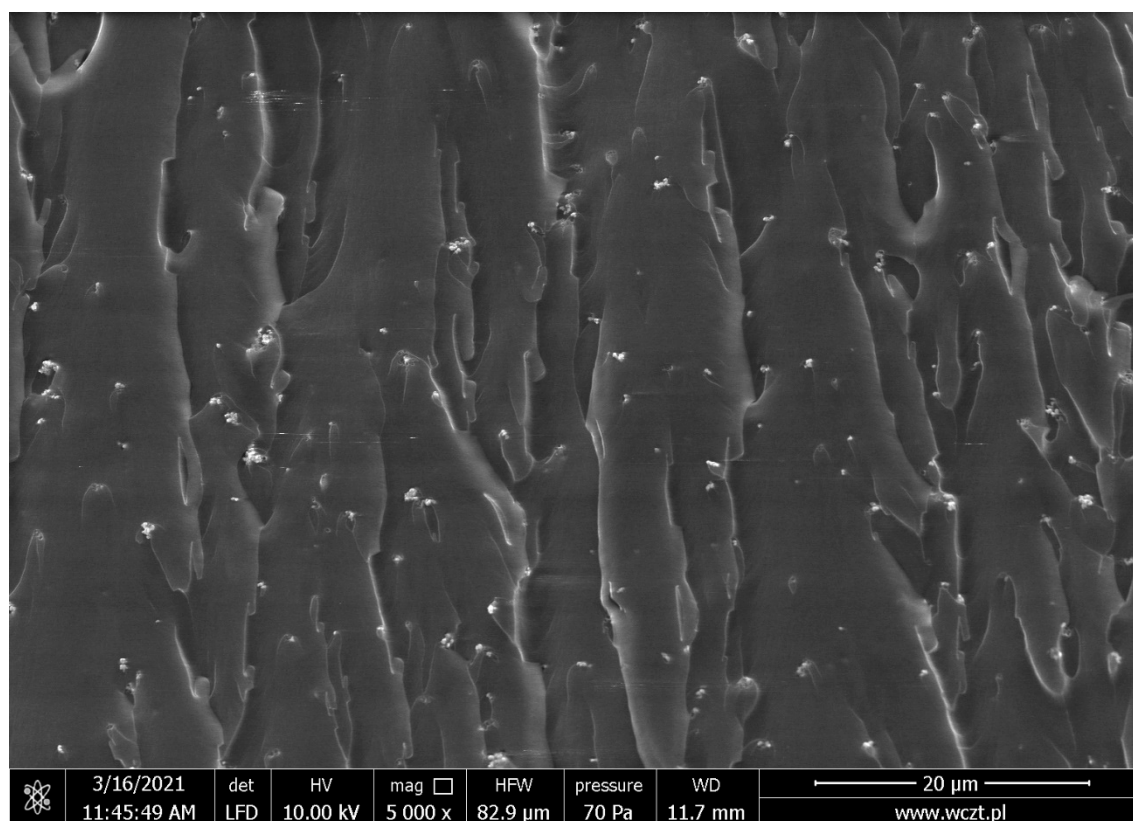

**2% TiO<sub>2</sub>, unmodified, mixing pump**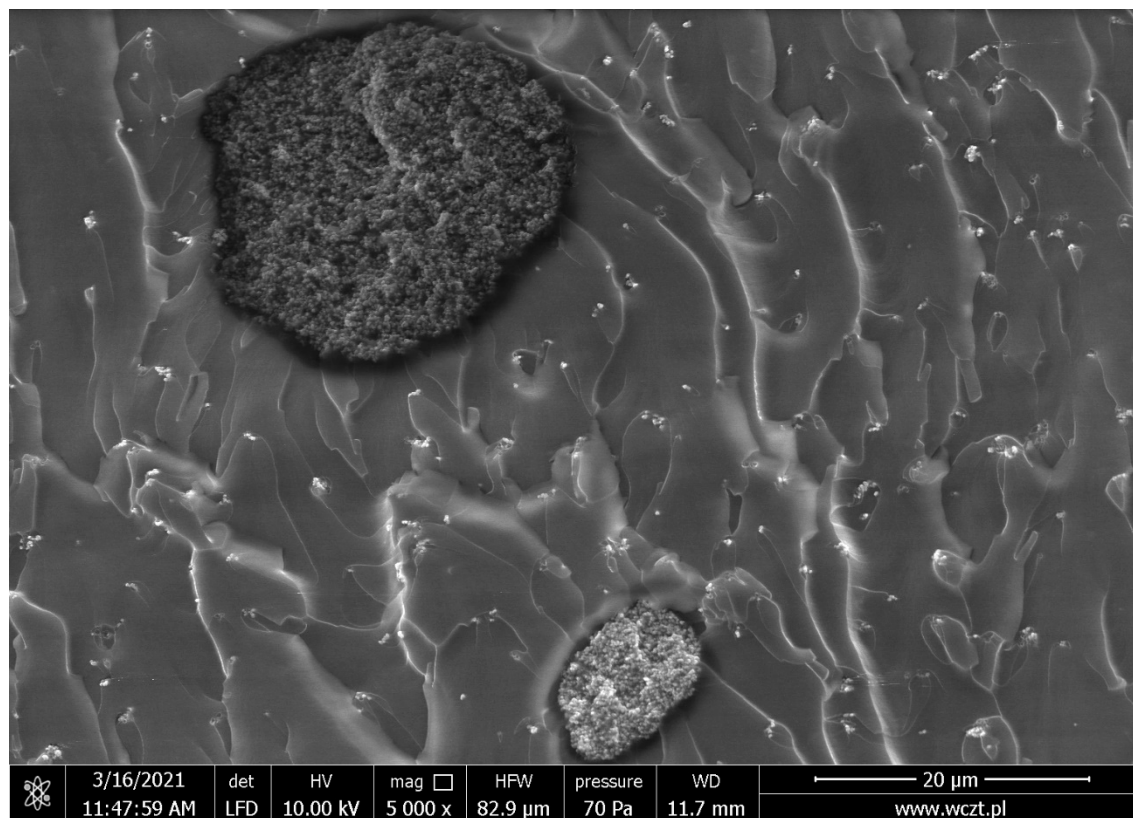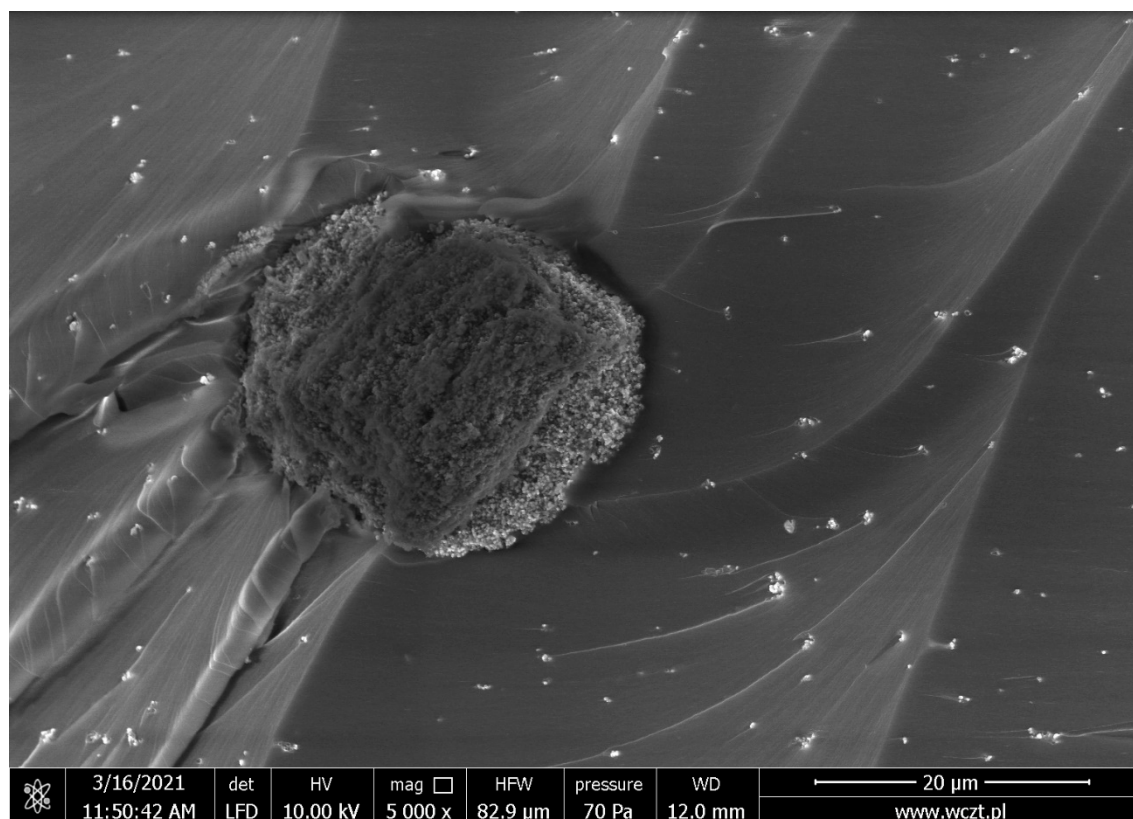

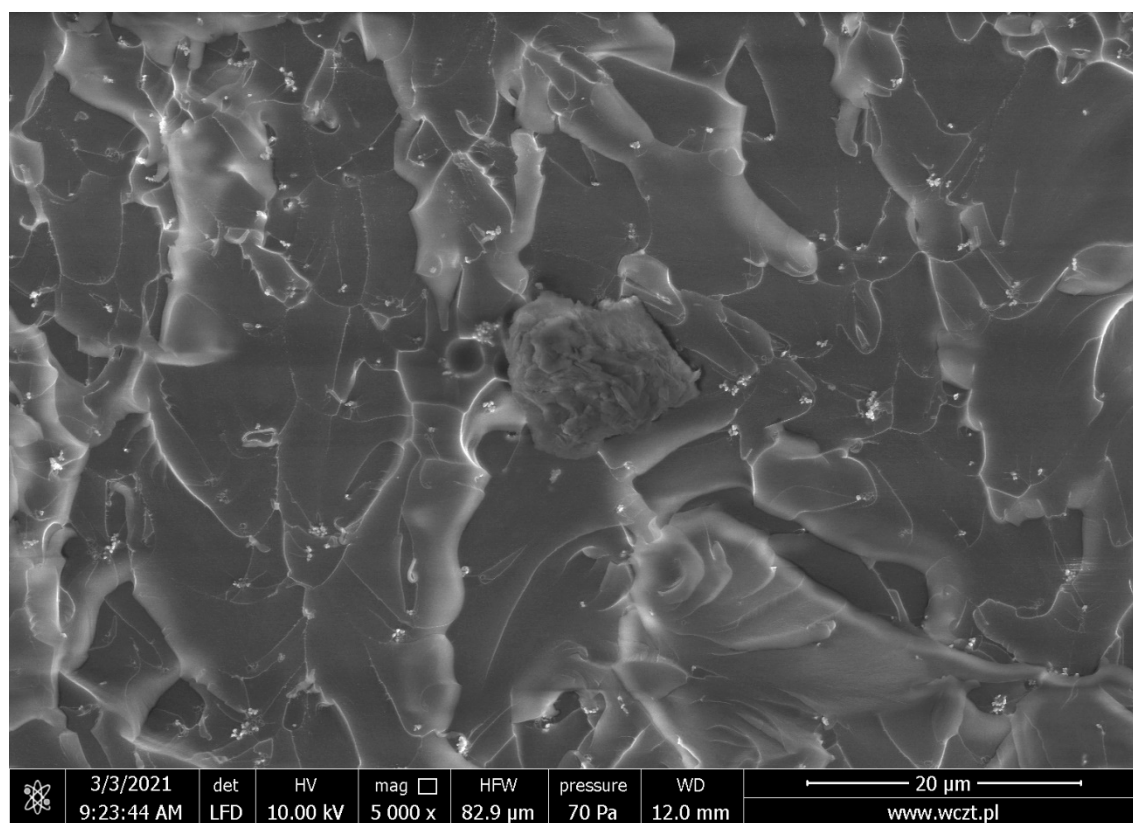



**1%TiO<sub>2</sub>, 0.5% iBuTMOS, mixing pump**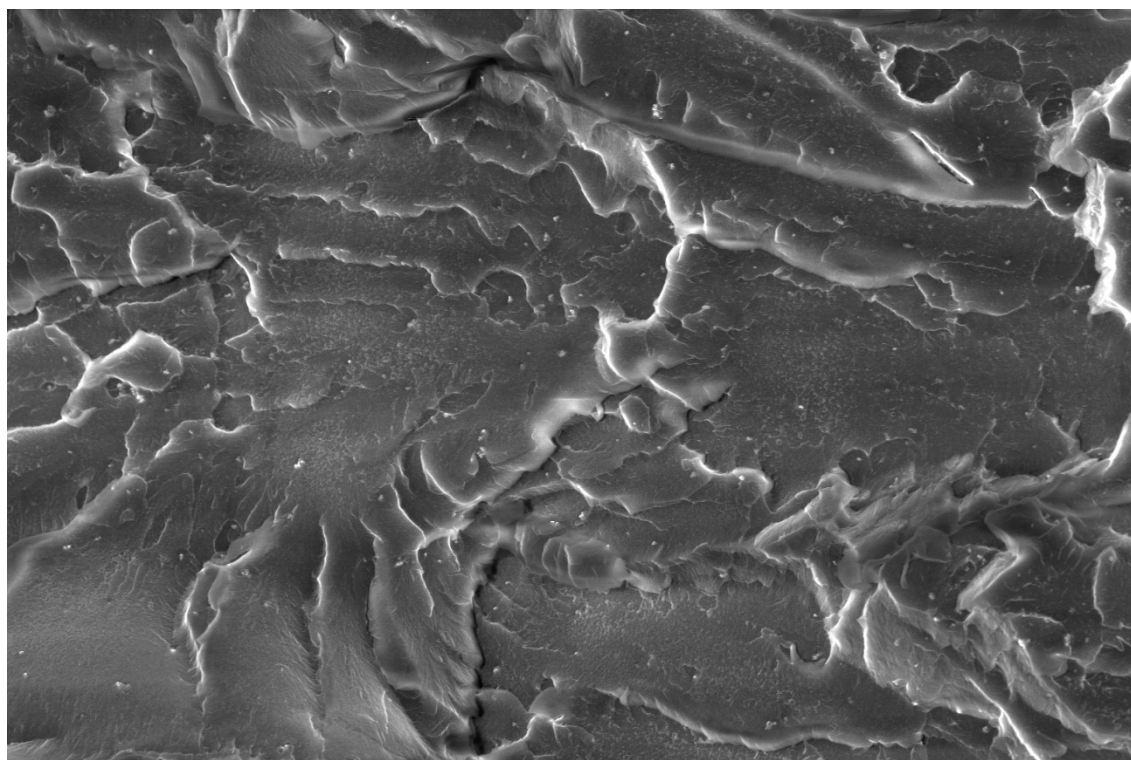

|                                                                                     |                         |            |                |                                         |                |                   |               |                      |
|-------------------------------------------------------------------------------------|-------------------------|------------|----------------|-----------------------------------------|----------------|-------------------|---------------|----------------------|
|  | 3/17/2021<br>9:19:21 AM | det<br>LFD | HV<br>10.00 kV | mag <input type="checkbox"/><br>5 000 x | HFW<br>82.9 μm | pressure<br>70 Pa | WD<br>11.3 mm | 20 μm<br>www.wczt.pl |
|-------------------------------------------------------------------------------------|-------------------------|------------|----------------|-----------------------------------------|----------------|-------------------|---------------|----------------------|

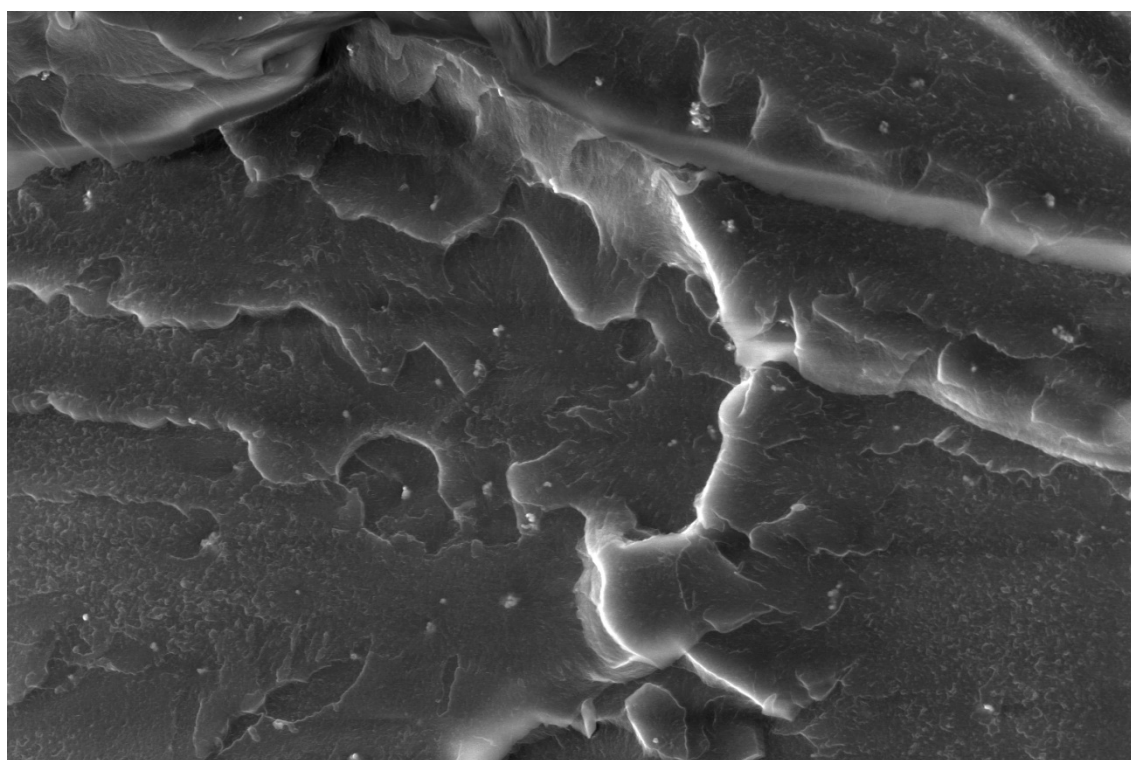

|                                                                                     |                         |            |                |                                          |                |                   |               |                      |
|-------------------------------------------------------------------------------------|-------------------------|------------|----------------|------------------------------------------|----------------|-------------------|---------------|----------------------|
|  | 3/17/2021<br>9:21:35 AM | det<br>LFD | HV<br>10.00 kV | mag <input type="checkbox"/><br>10 000 x | HFW<br>41.4 μm | pressure<br>70 Pa | WD<br>11.3 mm | 10 μm<br>www.wczt.pl |
|-------------------------------------------------------------------------------------|-------------------------|------------|----------------|------------------------------------------|----------------|-------------------|---------------|----------------------|



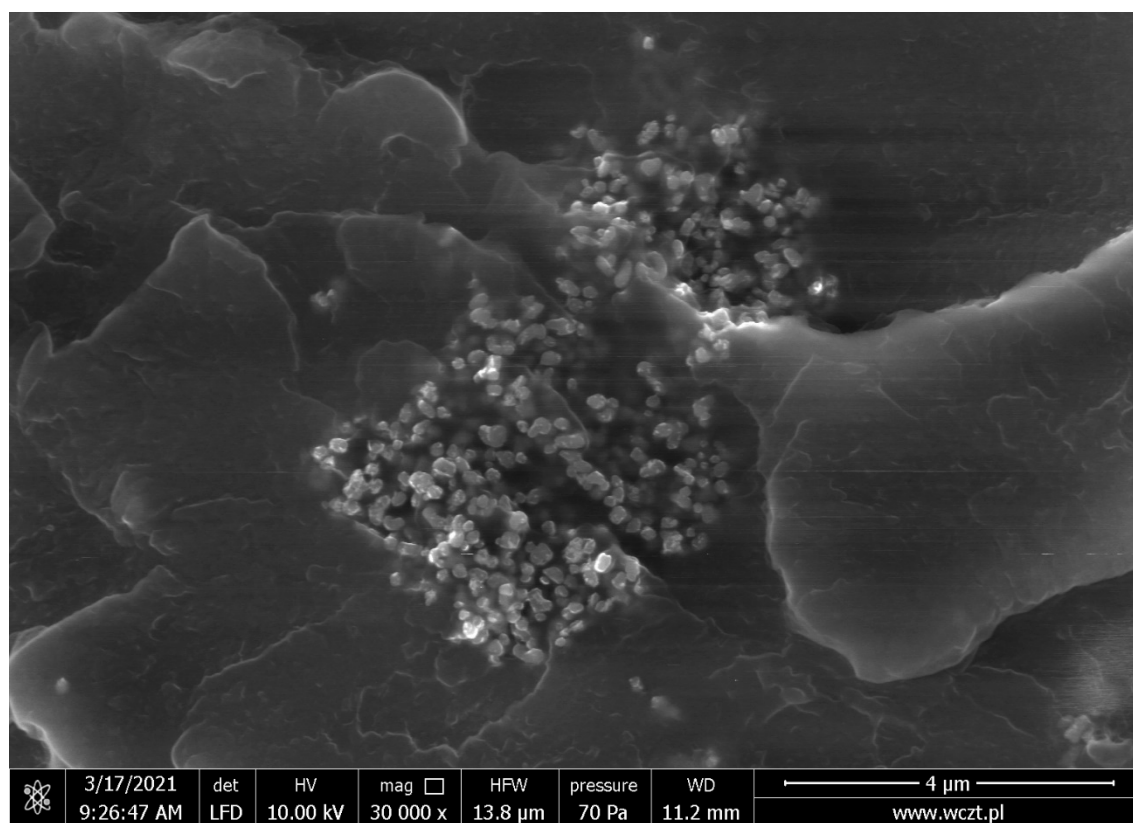

**2%TiO<sub>2</sub>, 0.5% iBuTMOS, mixing pump**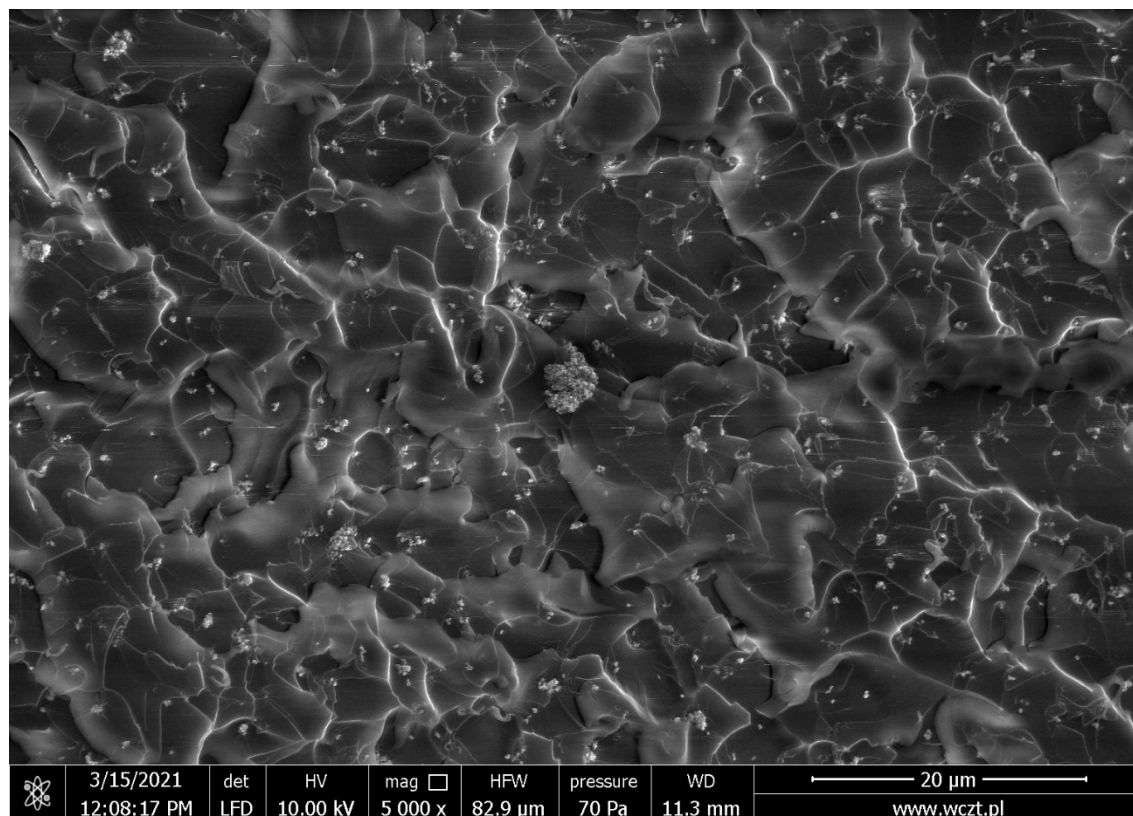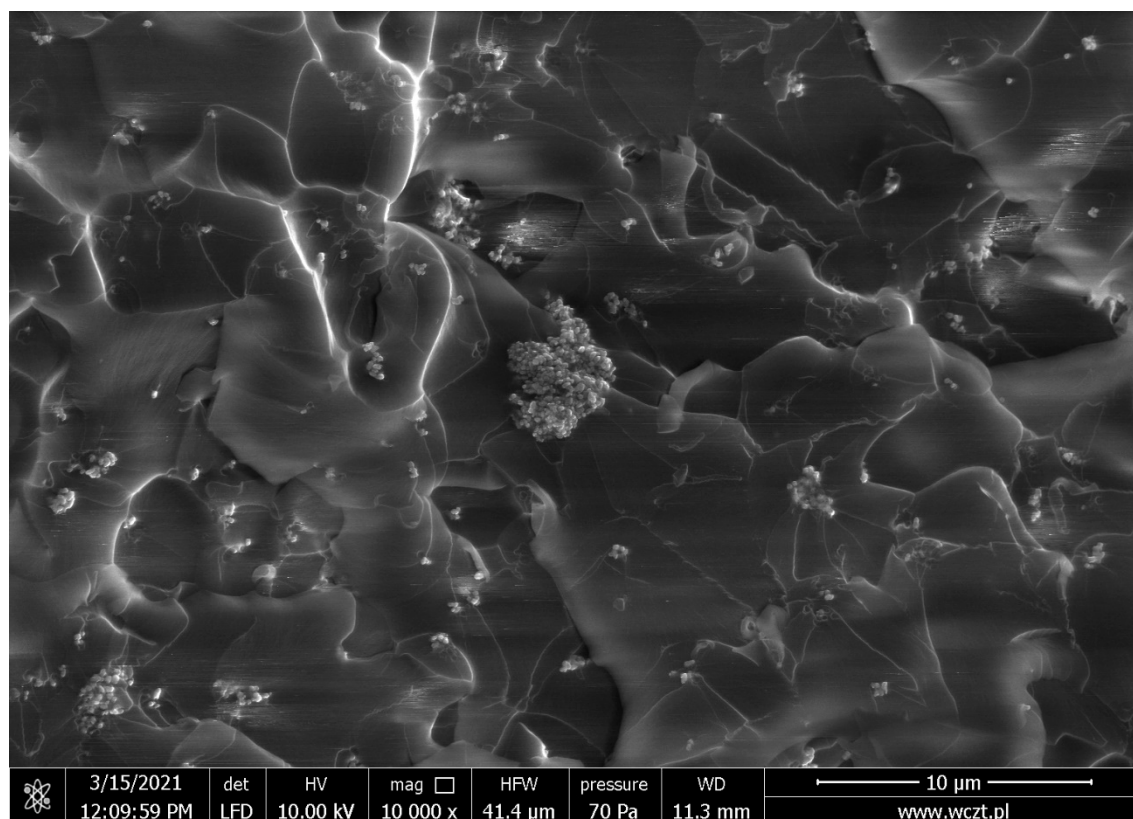

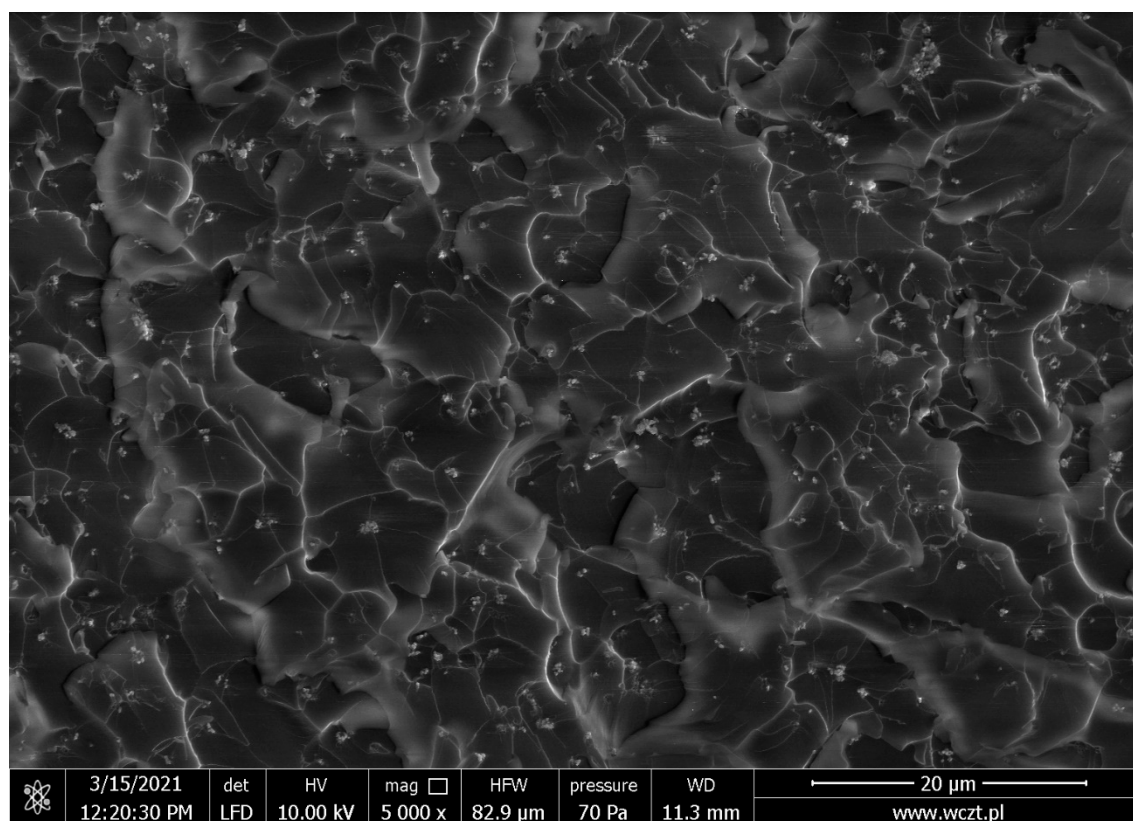

1%TiO<sub>2</sub>, 1.5% iBuTMOS, mechanical stirrer

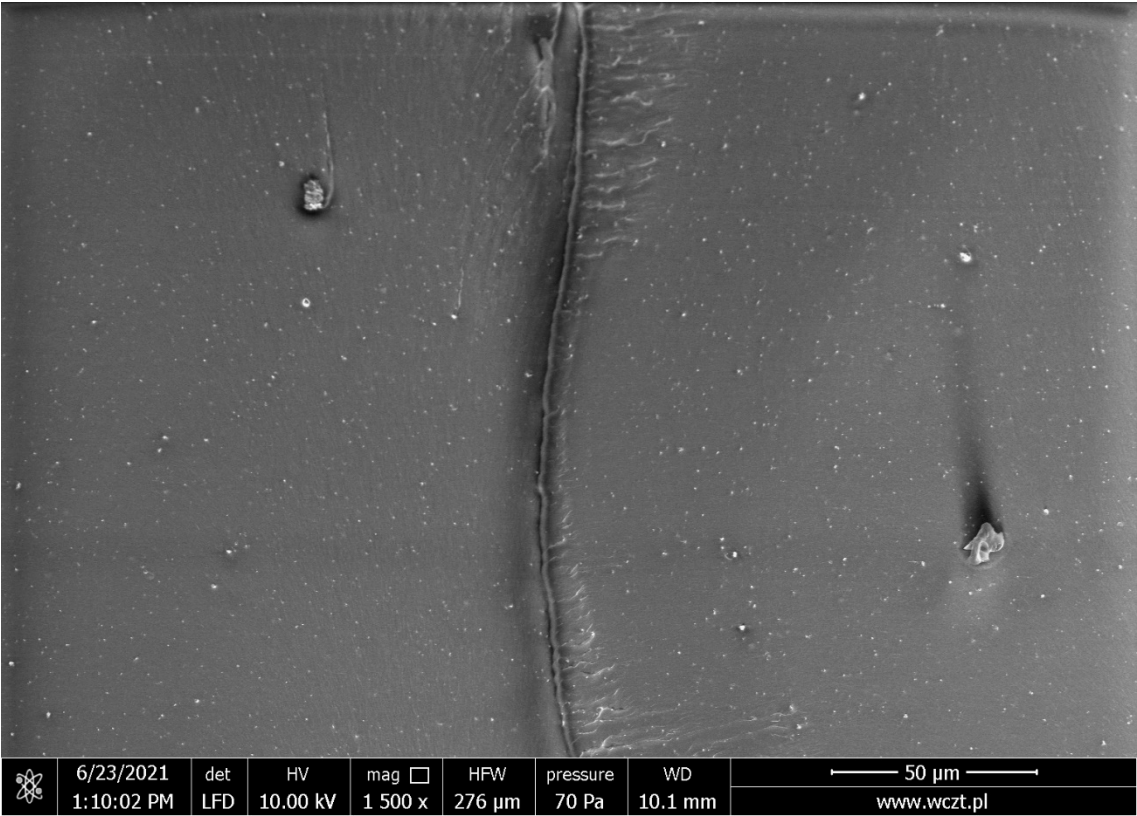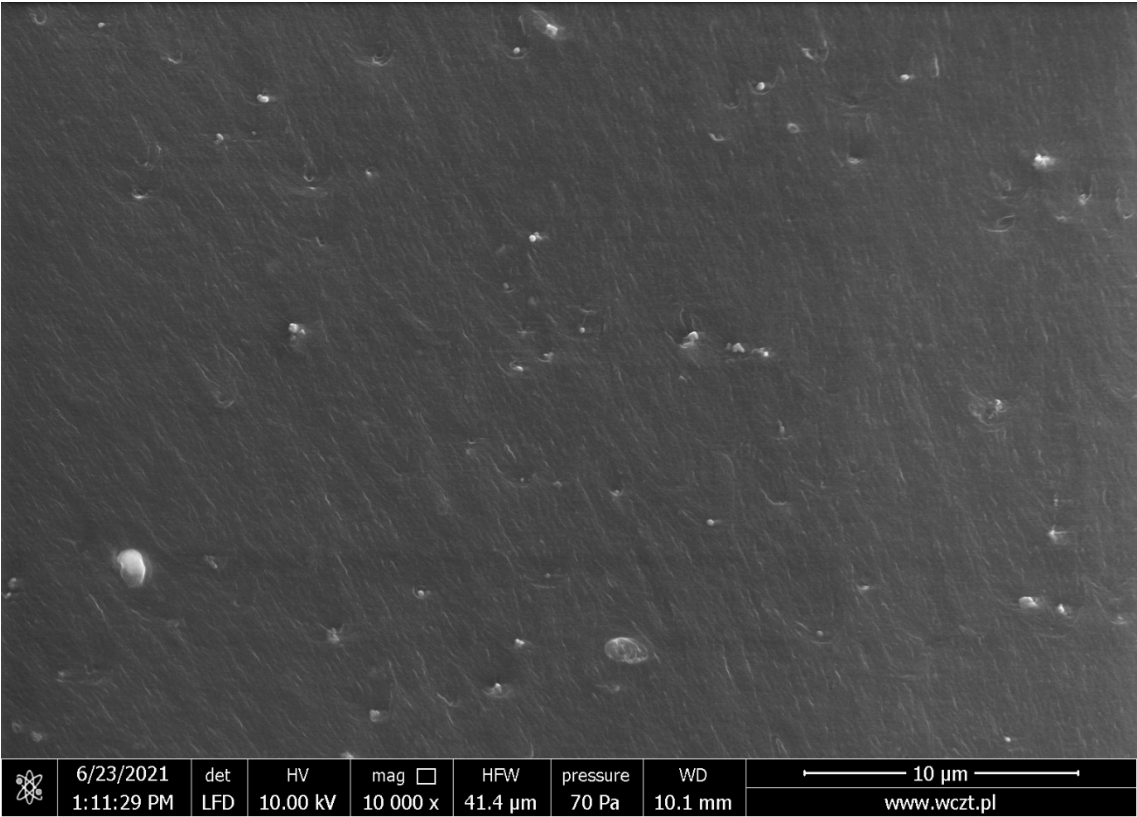

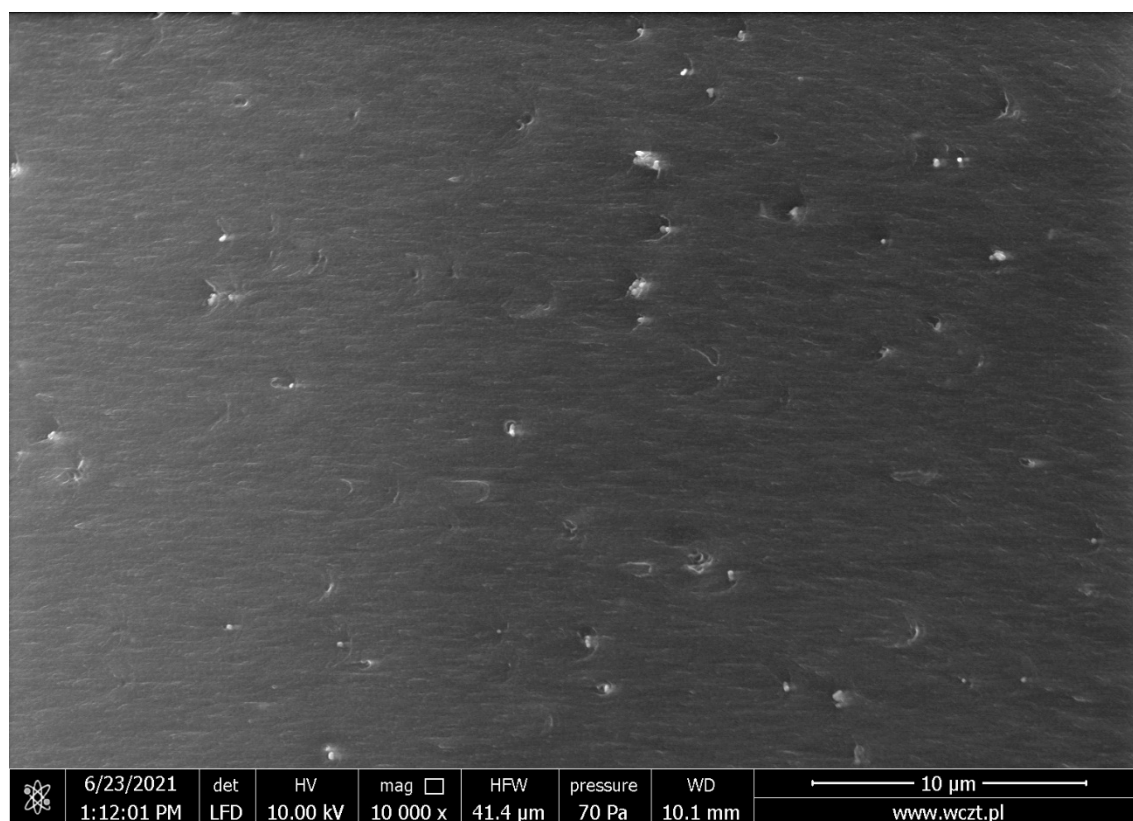

**1%TiO<sub>2</sub>, 1.5% iBuTMOS, mixing pump**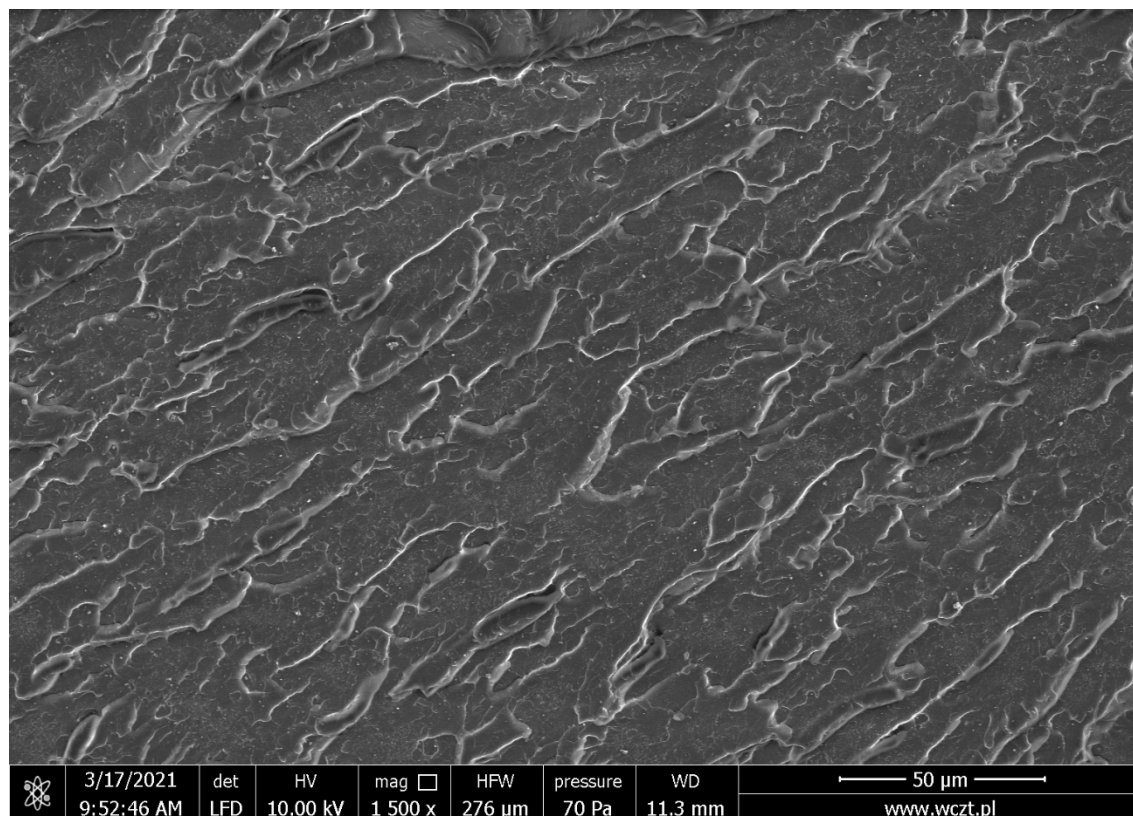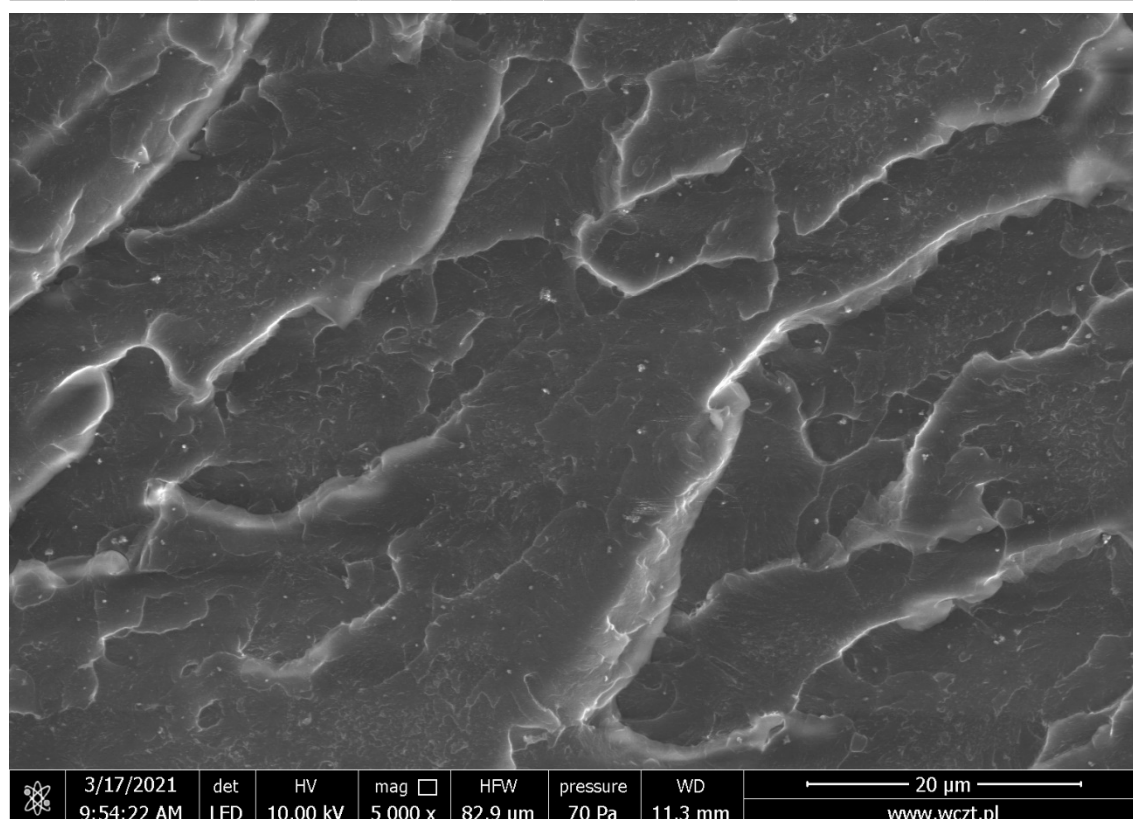



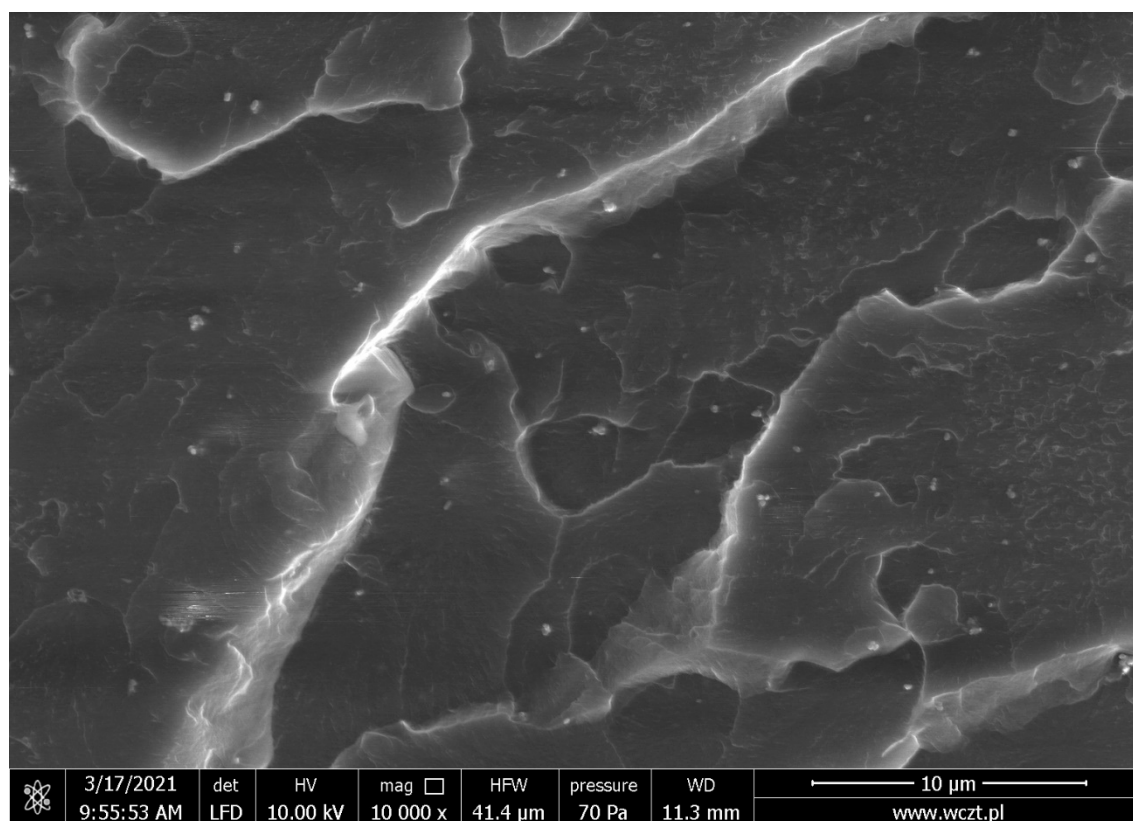

2%TiO<sub>2</sub>, 1.5% iBuTMOS, mixing pump

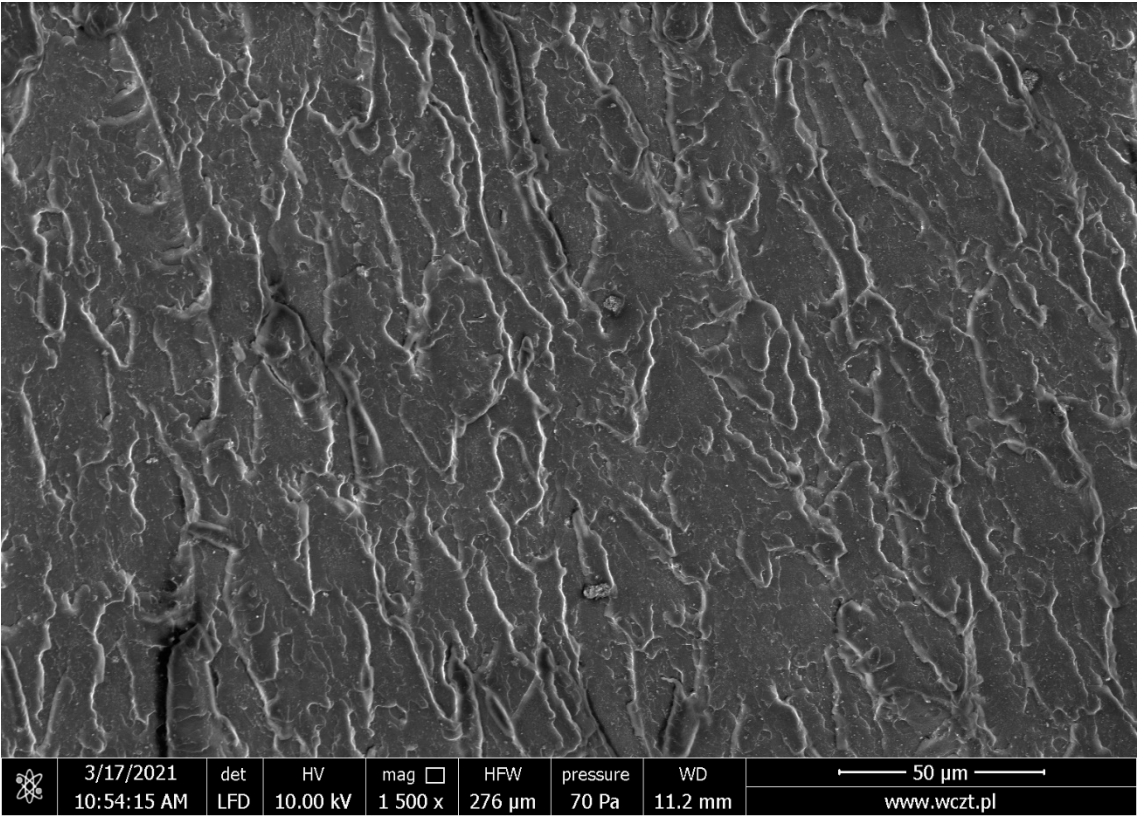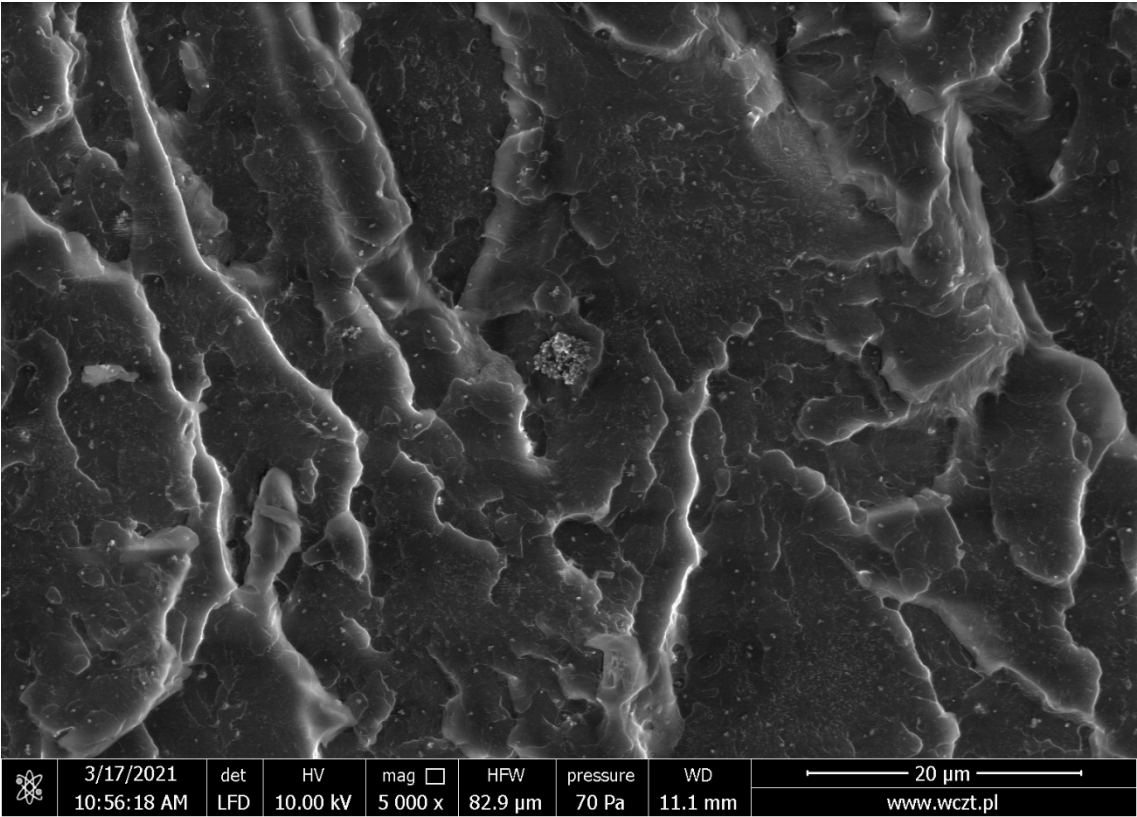



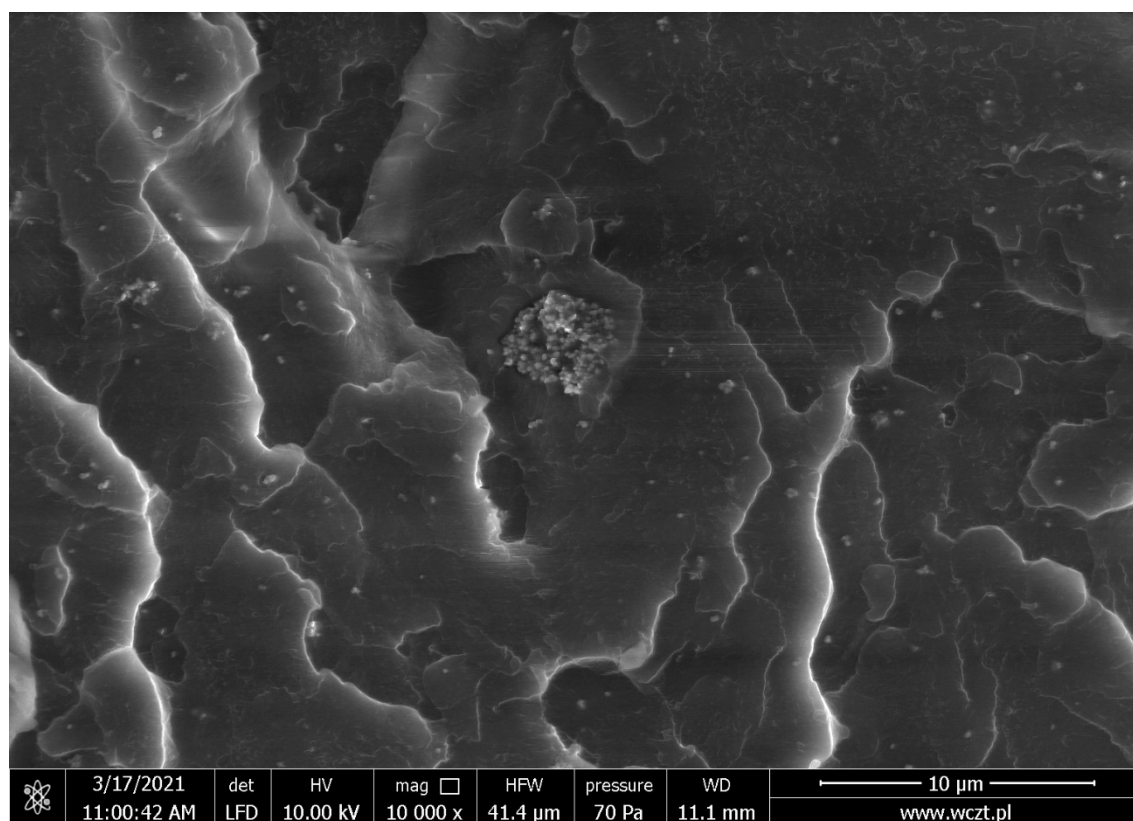

**1%TiO<sub>2</sub>, 0.5% GPTES, mixing pump**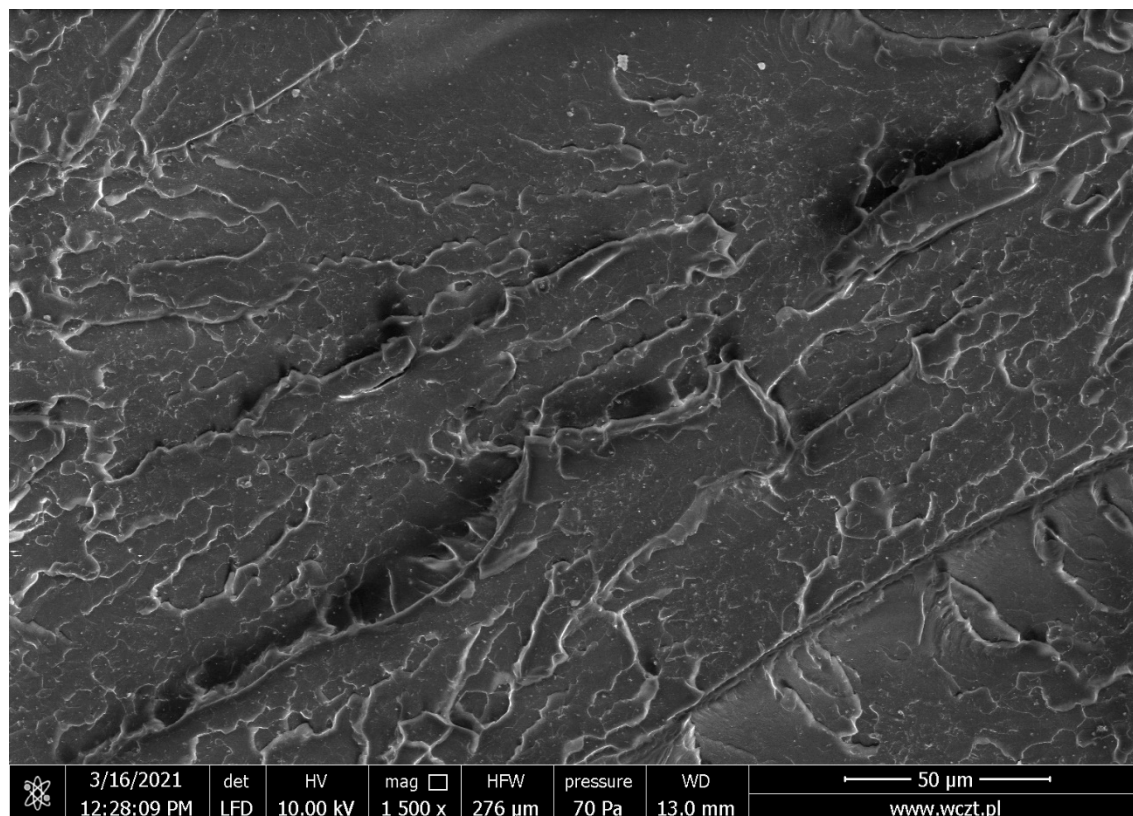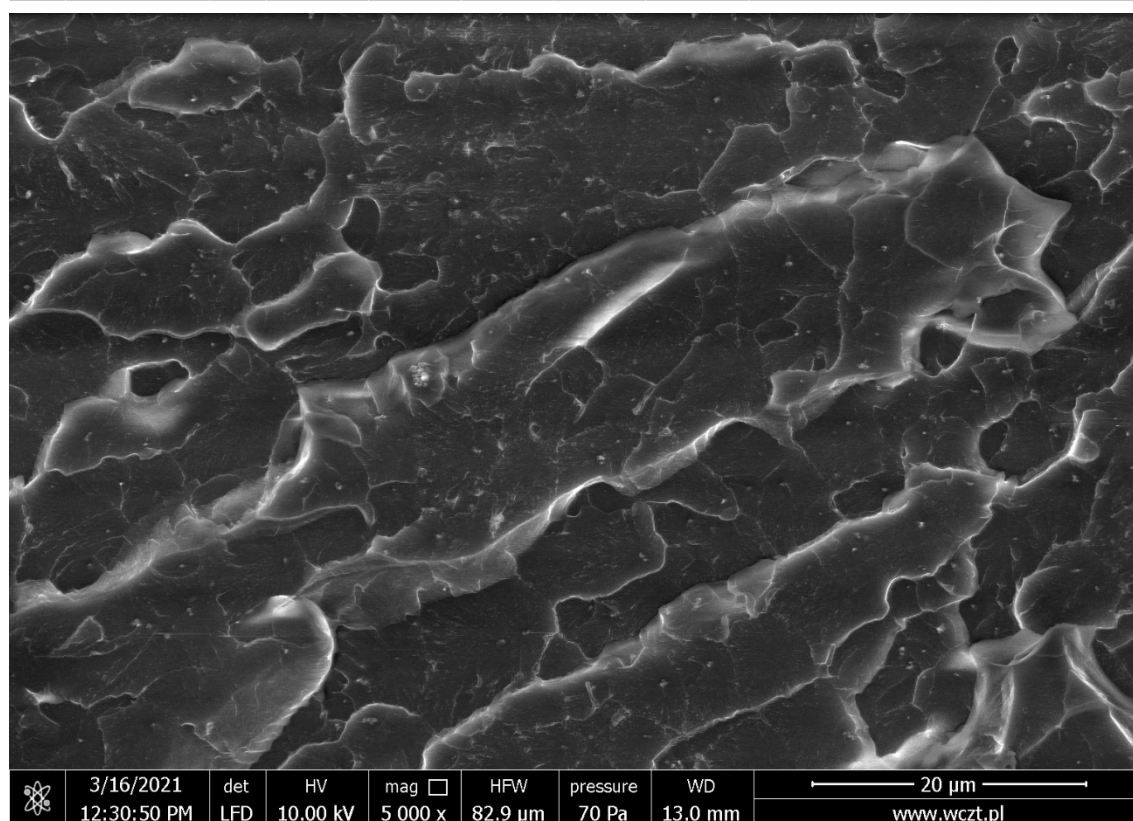

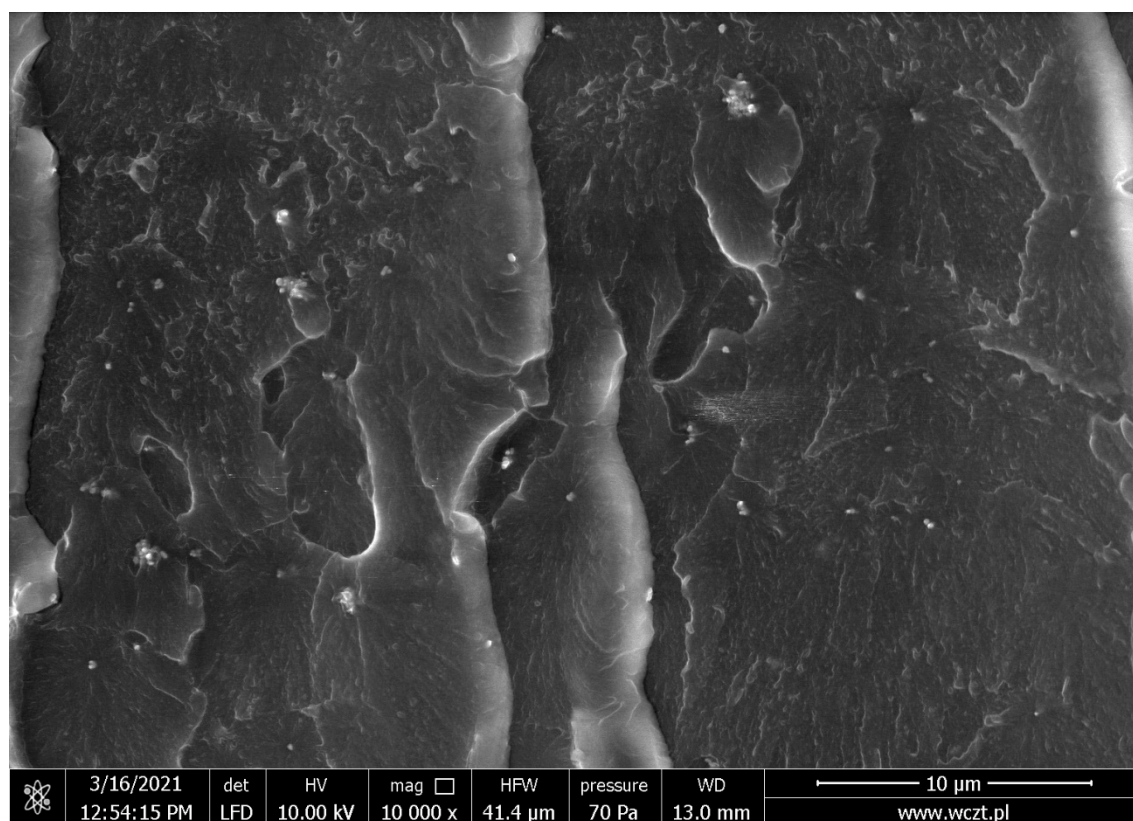

**2%TiO<sub>2</sub>, 0.5% GPTES, mixing pump**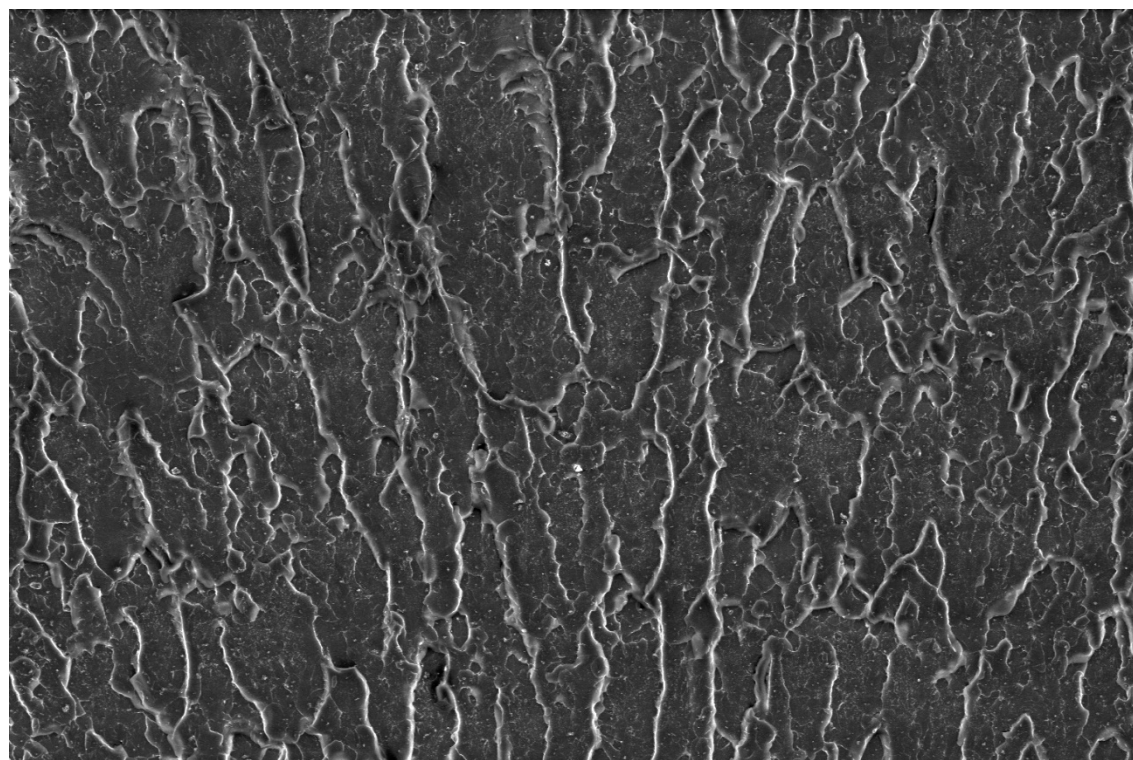

|                                                                                     |            |     |          |         |   |        |          |         |                                                                                                                                               |
|-------------------------------------------------------------------------------------|------------|-----|----------|---------|---|--------|----------|---------|-----------------------------------------------------------------------------------------------------------------------------------------------|
|  | 3/16/2021  | det | HV       | mag     | □ | HFW    | pressure | WD      | <br>50 μm<br><a href="http://www.wczt.pl">www.wczt.pl</a> |
|                                                                                     | 1:46:08 PM | LFD | 10.00 kV | 1 500 x |   | 276 μm | 70 Pa    | 12.1 mm |                                                                                                                                               |

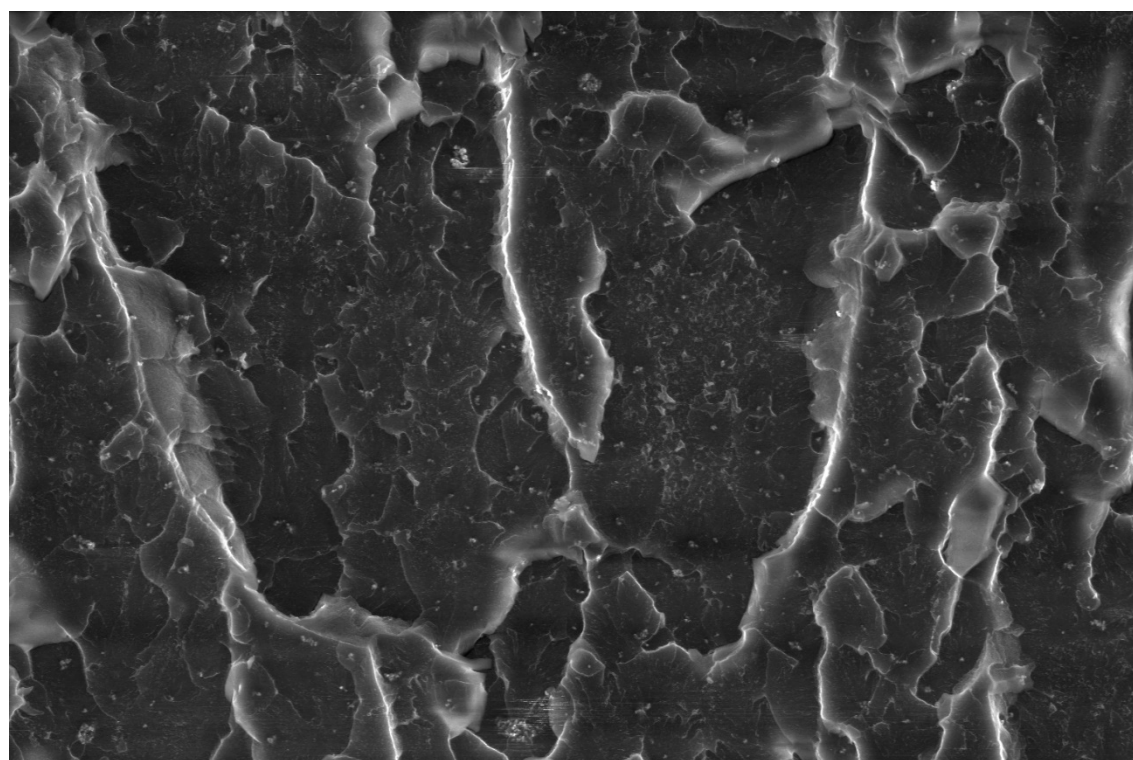

|                                                                                     |            |     |          |         |   |         |          |         |                                                                                                                                               |
|-------------------------------------------------------------------------------------|------------|-----|----------|---------|---|---------|----------|---------|-----------------------------------------------------------------------------------------------------------------------------------------------|
|  | 3/16/2021  | det | HV       | mag     | □ | HFW     | pressure | WD      | <br>20 μm<br><a href="http://www.wczt.pl">www.wczt.pl</a> |
|                                                                                     | 1:47:29 PM | LFD | 10.00 kV | 5 000 x |   | 82.9 μm | 70 Pa    | 12.2 mm |                                                                                                                                               |

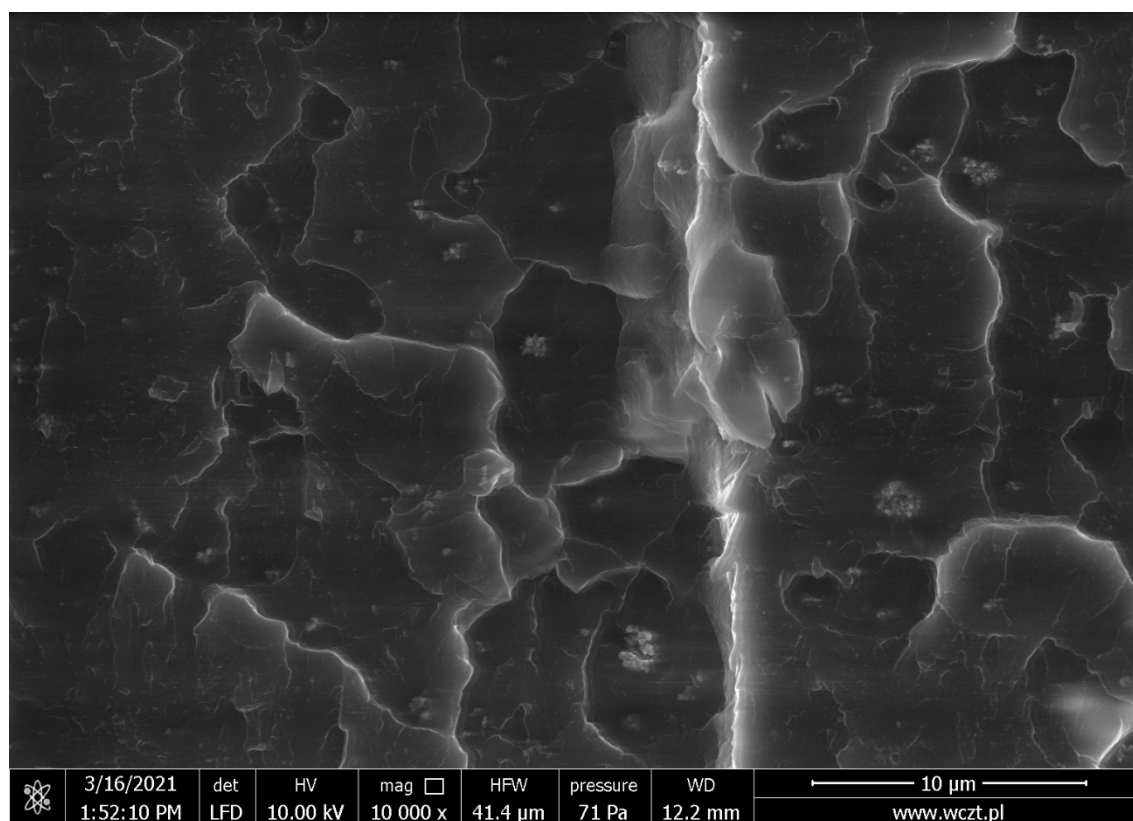



**1%TiO<sub>2</sub>, 1.5% GPTES, mechanical stirrer**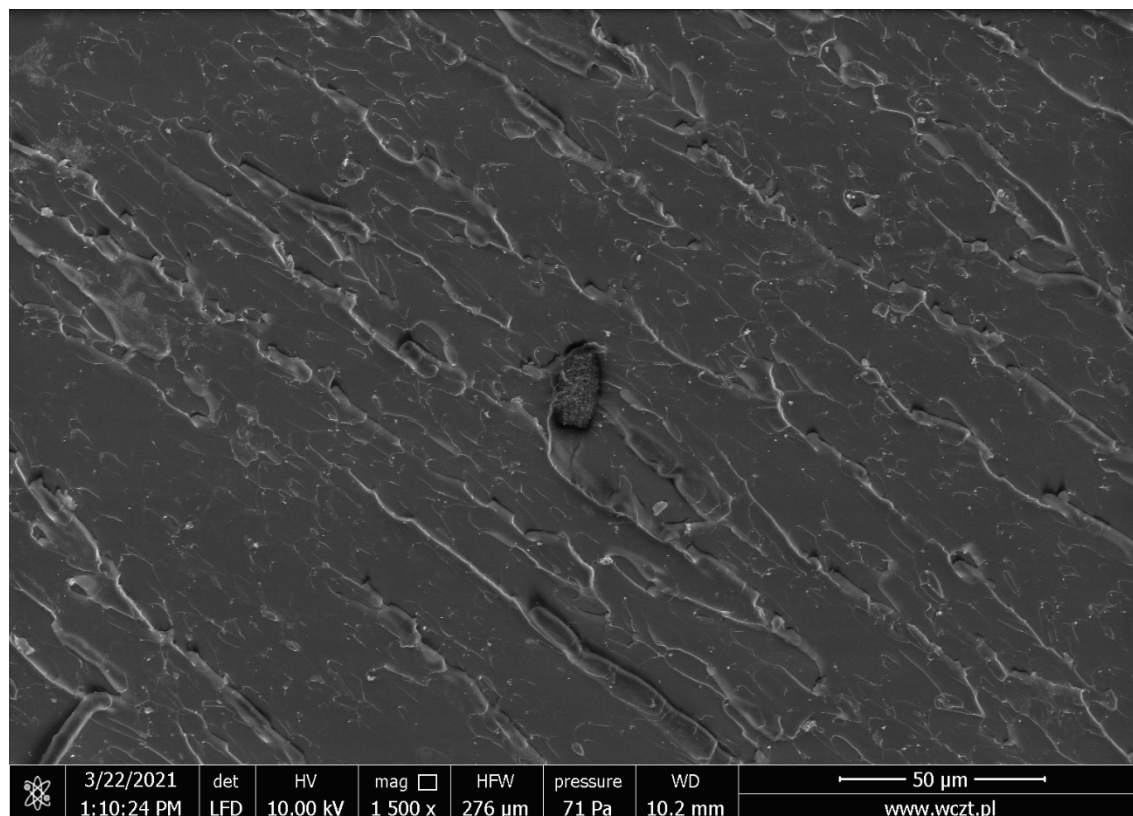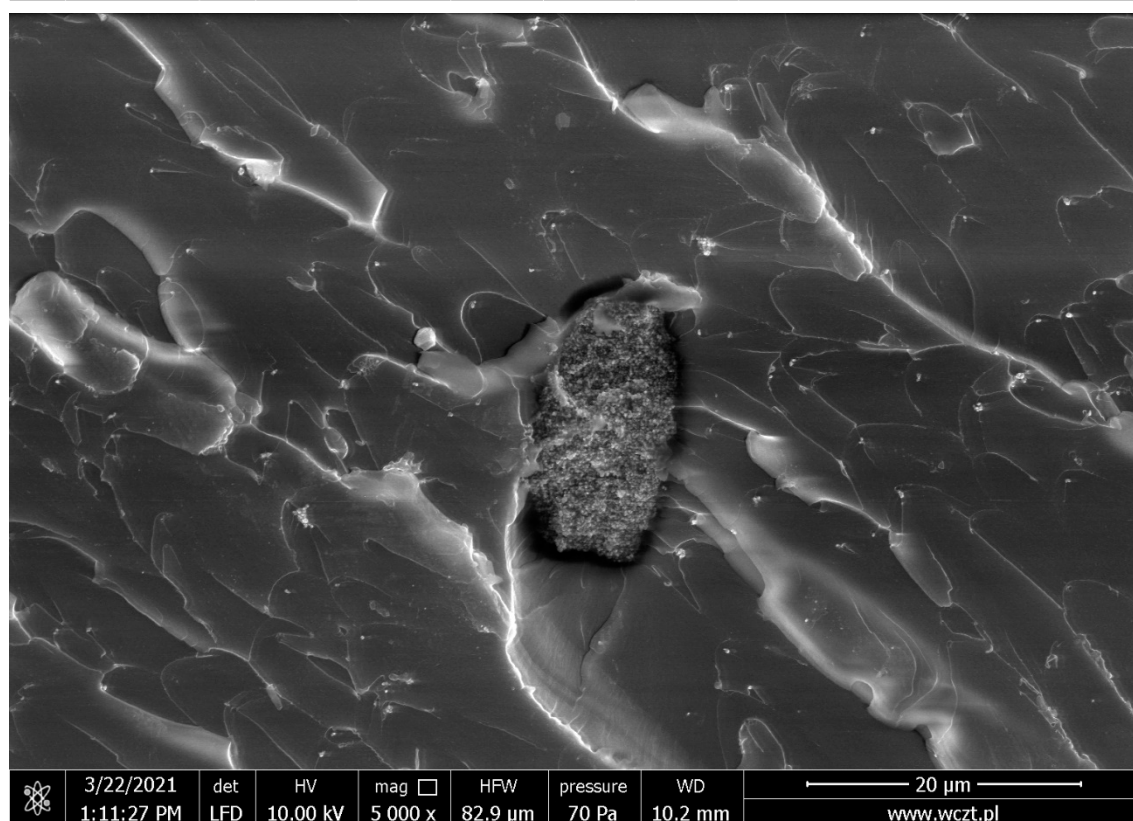

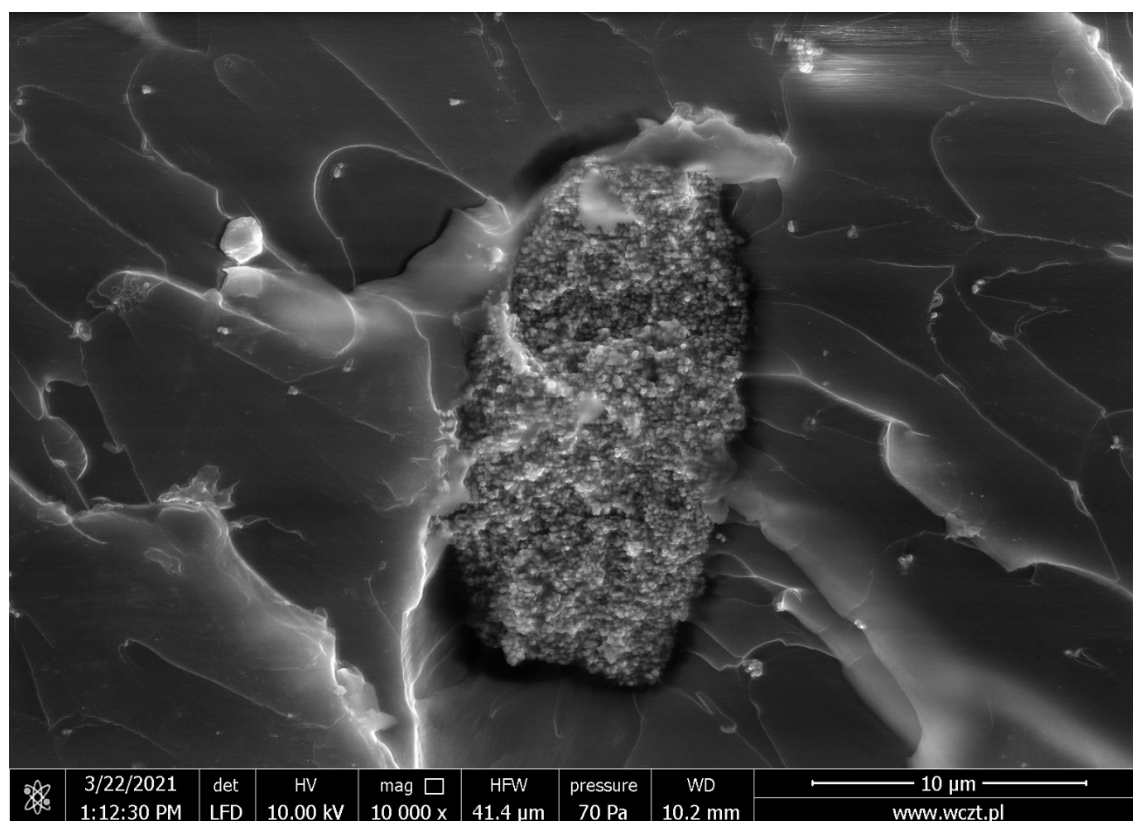

1%TiO<sub>2</sub>, 1.5% GPTES, mixing pump

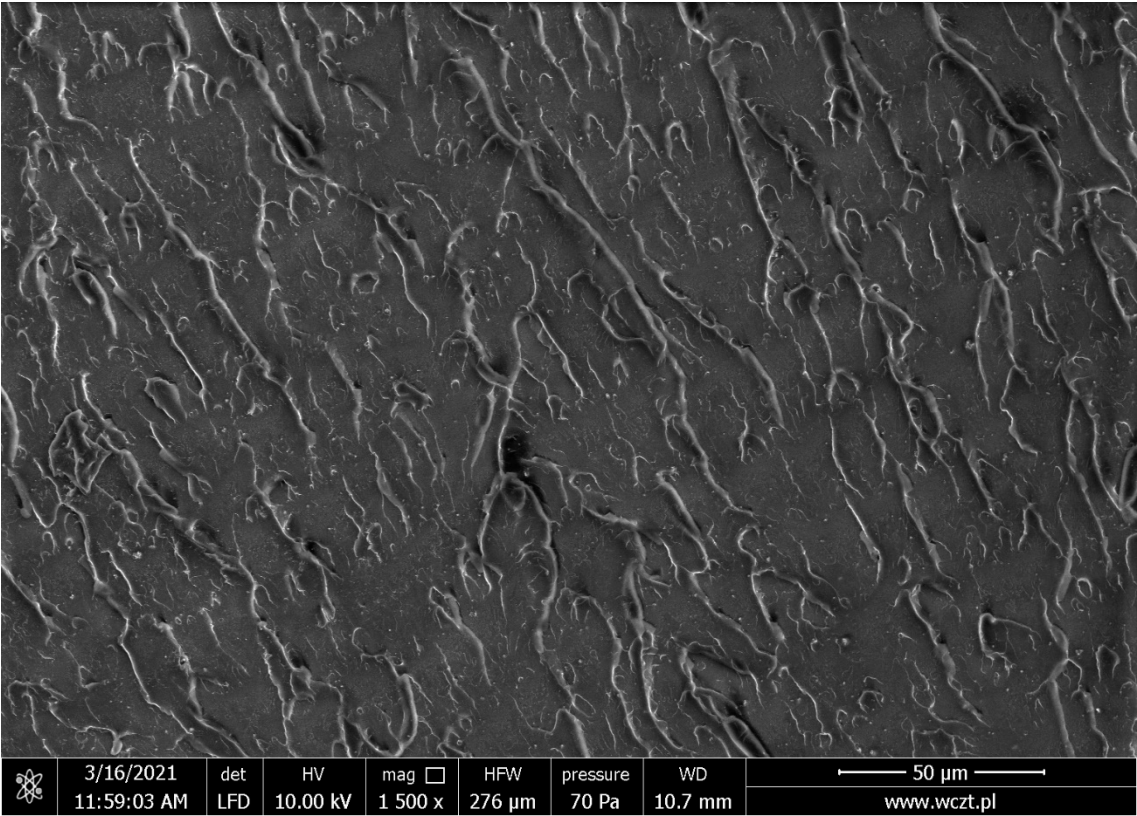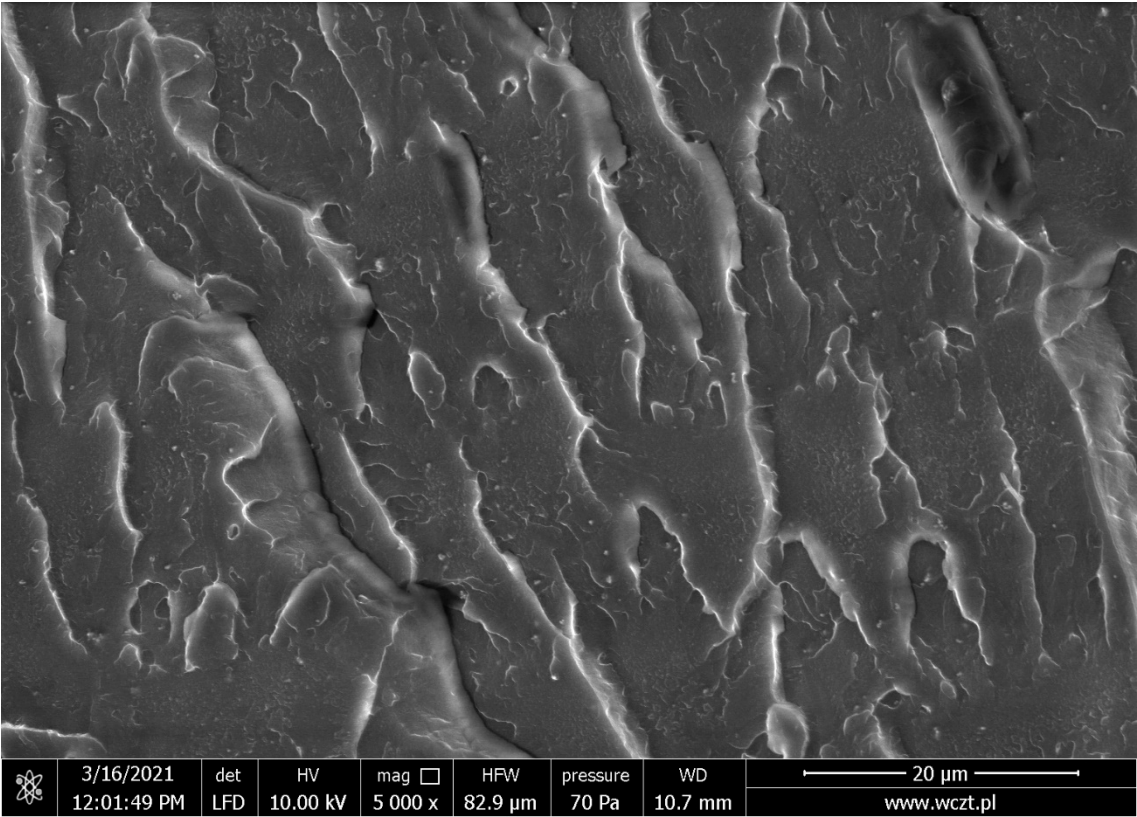



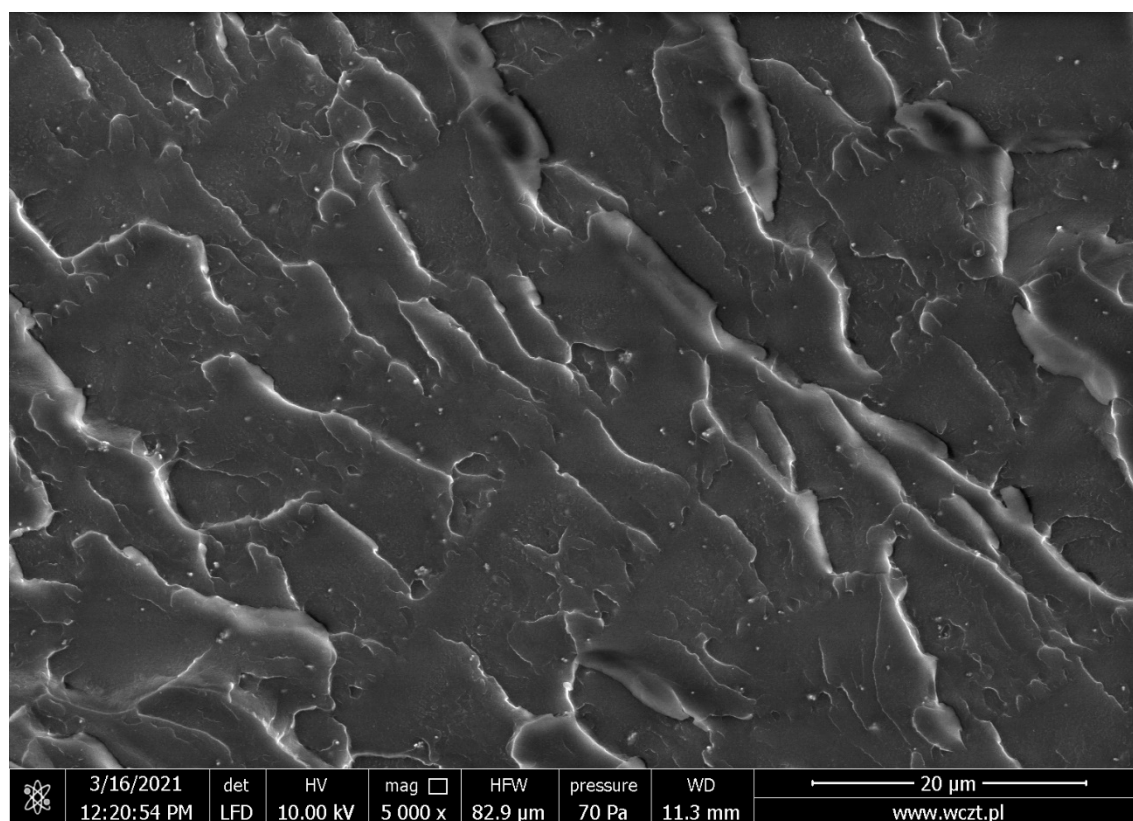

2%TiO<sub>2</sub>, 1.5% GPTES, mixing pump

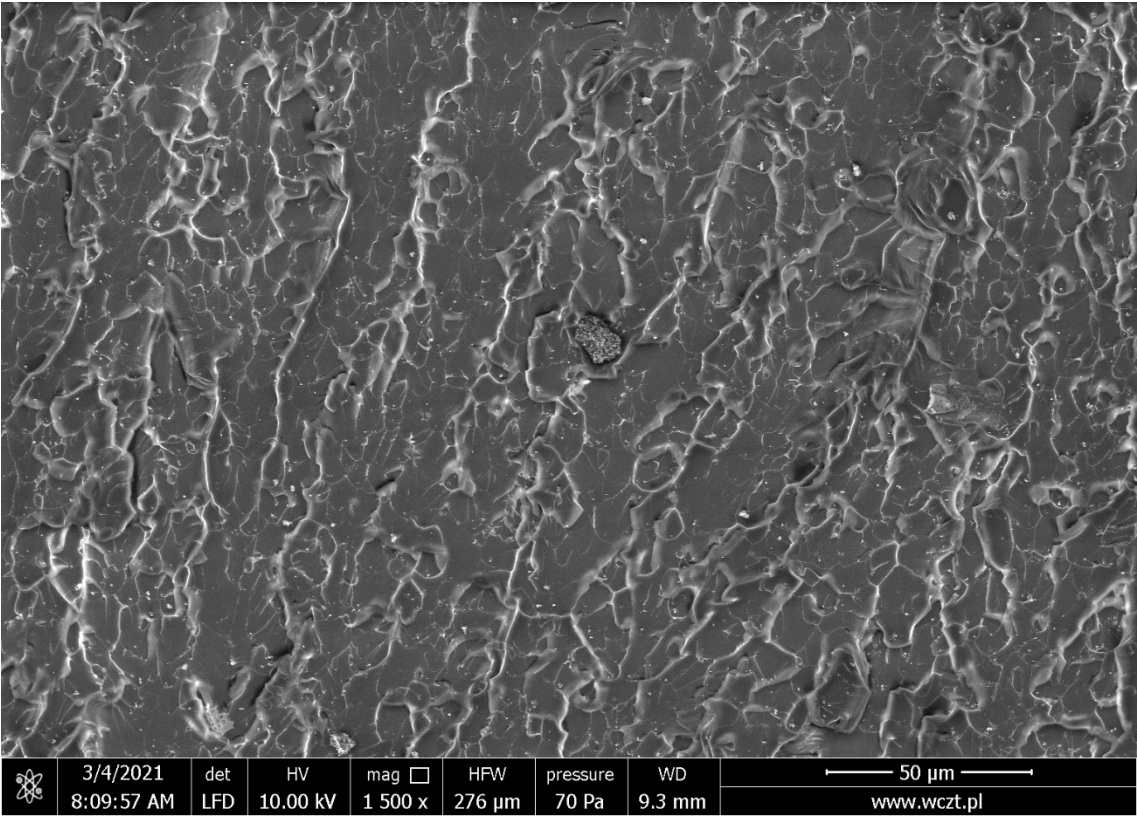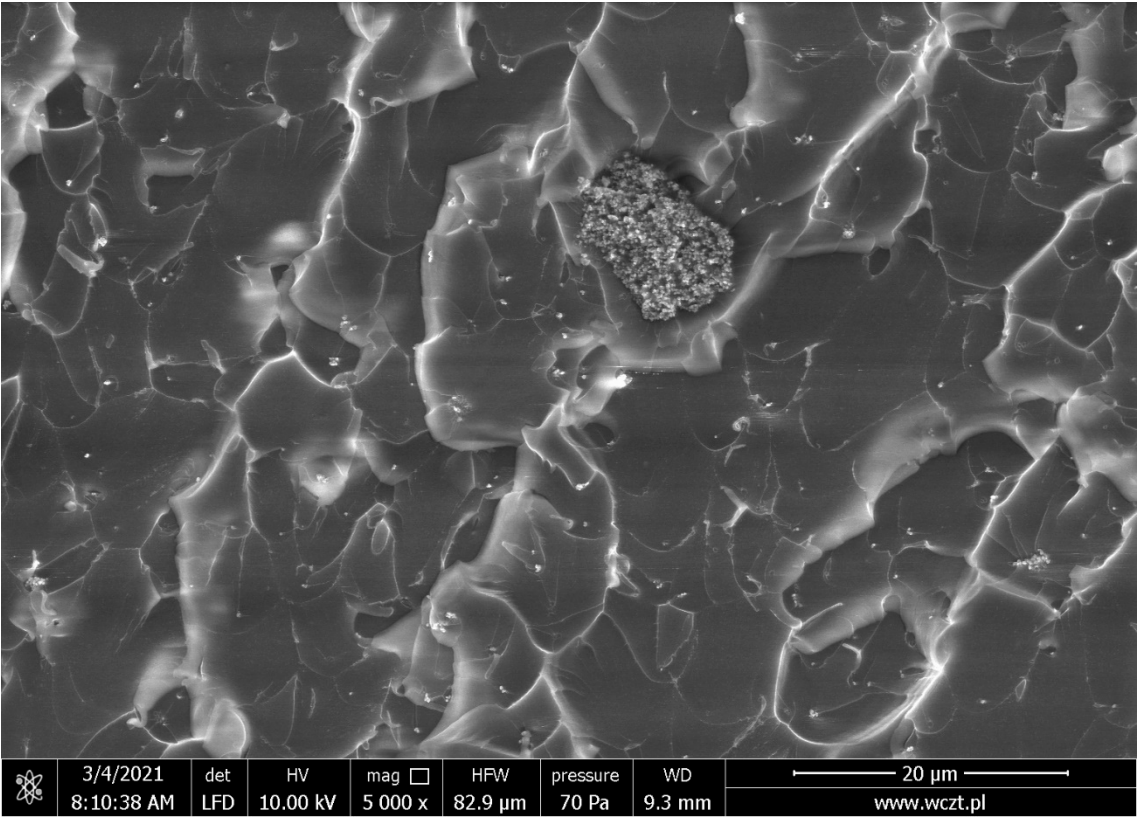

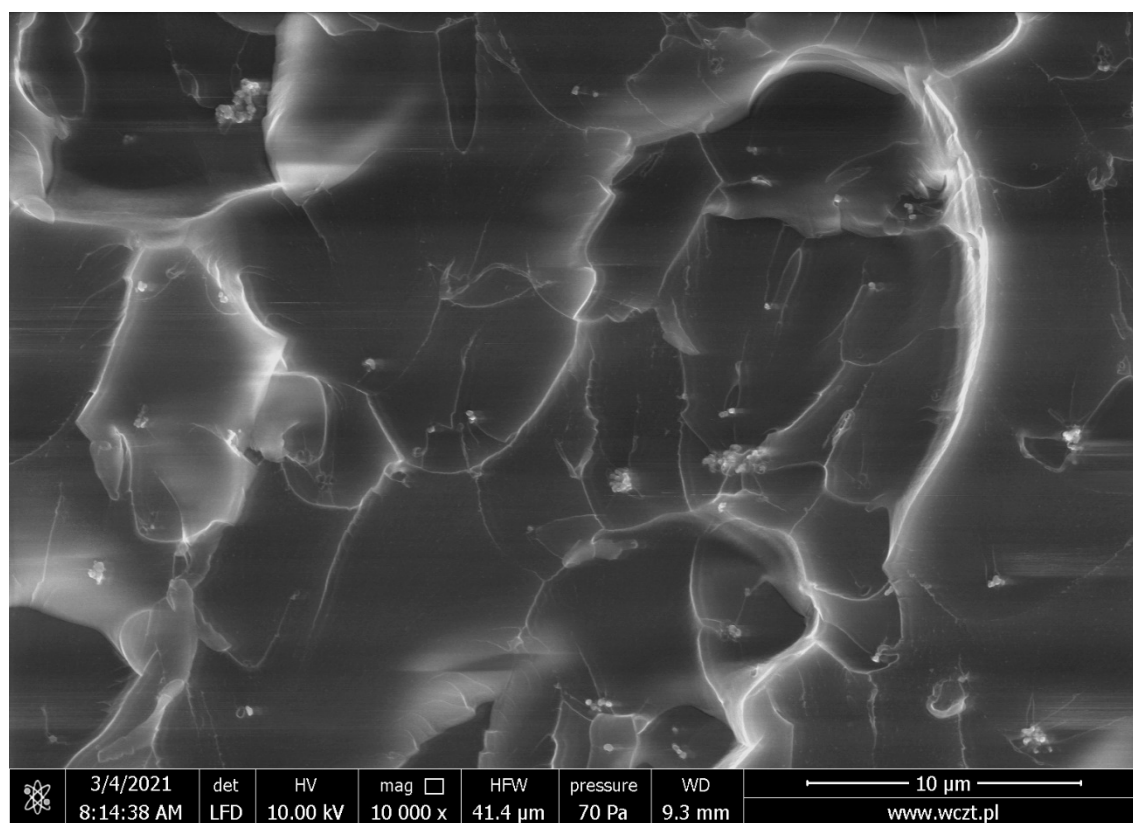

**1%TiO<sub>2</sub>, 0.5% iBu<sub>2</sub>SSQ-OEt, mixing pump**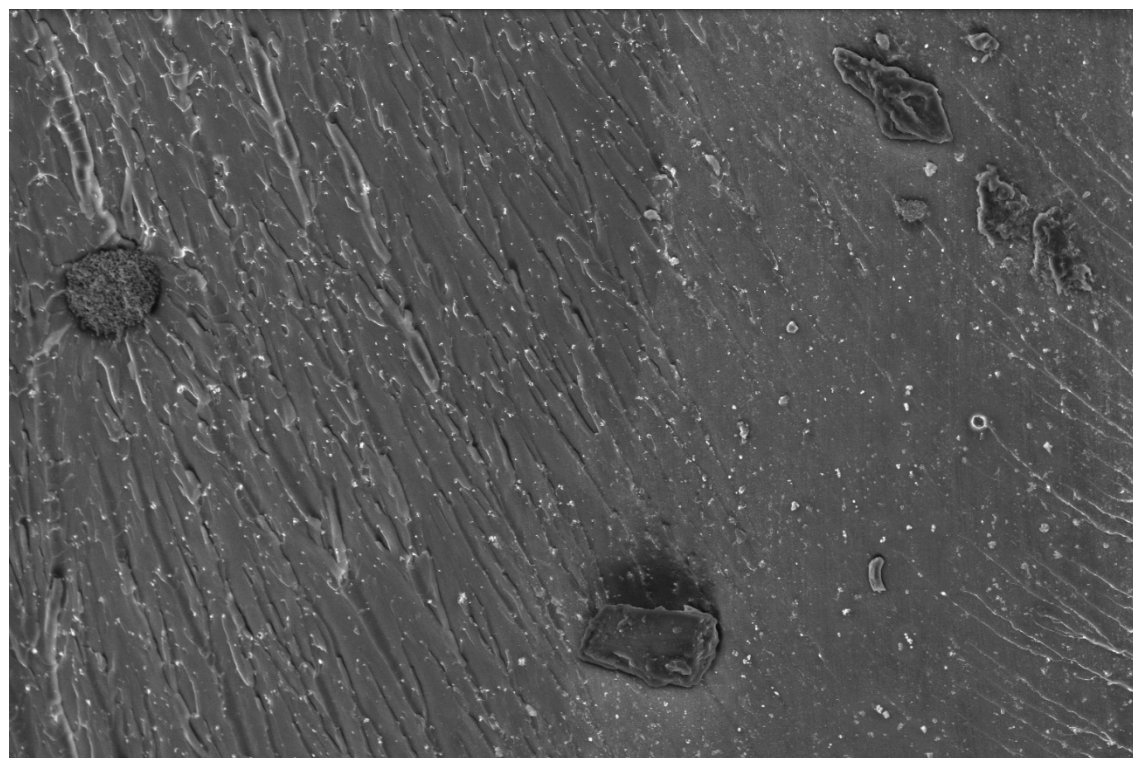

|                                                                                     |            |     |          |         |   |        |          |         |             |  |
|-------------------------------------------------------------------------------------|------------|-----|----------|---------|---|--------|----------|---------|-------------|--|
|  | 3/4/2021   | det | HV       | mag     | □ | HFW    | pressure | WD      | 50 µm       |  |
|                                                                                     | 8:33:56 AM | LFD | 10.00 kV | 1 500 x |   | 276 µm | 70 Pa    | 10.7 mm | www.wczt.pl |  |

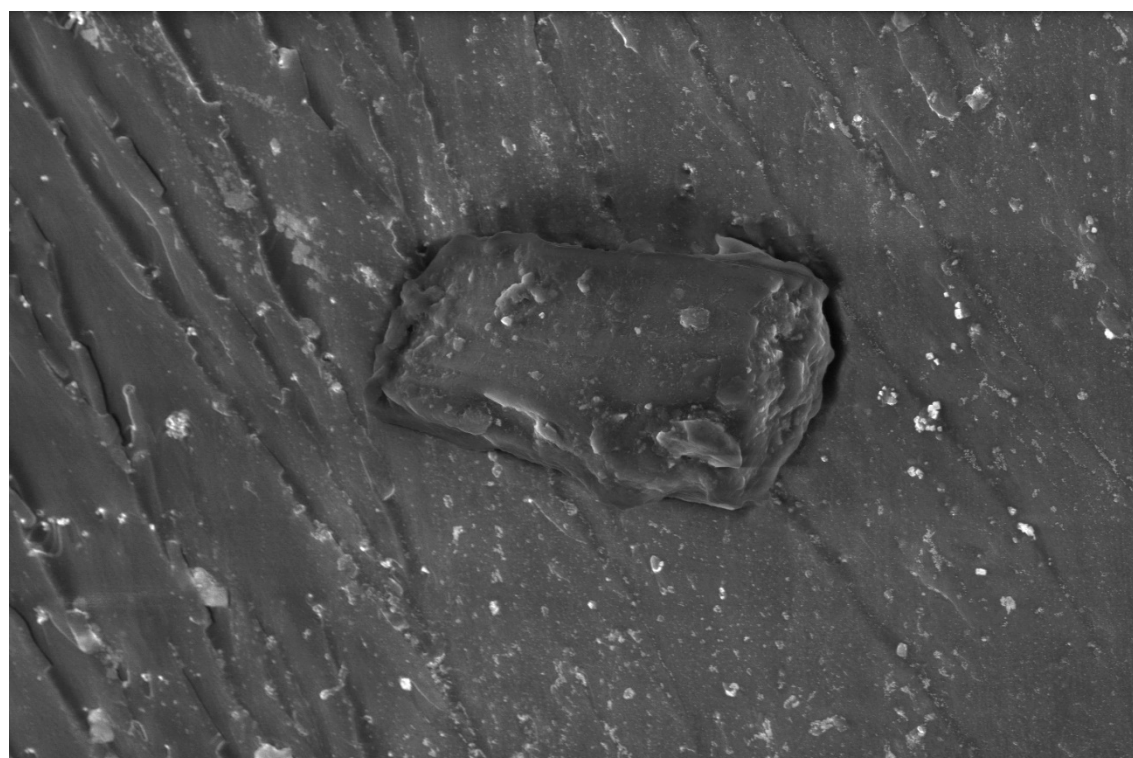

|                                                                                     |            |     |          |         |   |         |          |         |             |  |
|-------------------------------------------------------------------------------------|------------|-----|----------|---------|---|---------|----------|---------|-------------|--|
|  | 3/4/2021   | det | HV       | mag     | □ | HFW     | pressure | WD      | 20 µm       |  |
|                                                                                     | 8:34:31 AM | LFD | 10.00 kV | 5 000 x |   | 82.9 µm | 70 Pa    | 10.7 mm | www.wczt.pl |  |

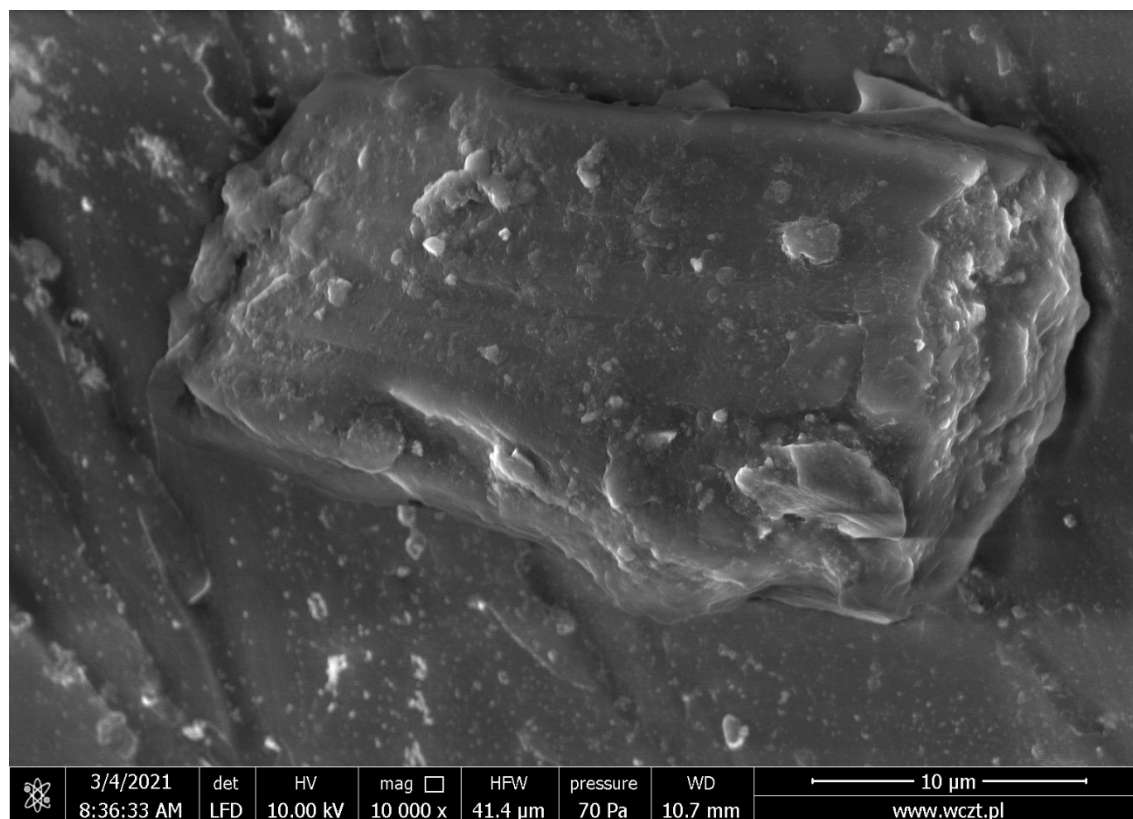



**2%TiO<sub>2</sub>, 0.5% iBu<sub>2</sub>SSQ-OEt, mixing pump**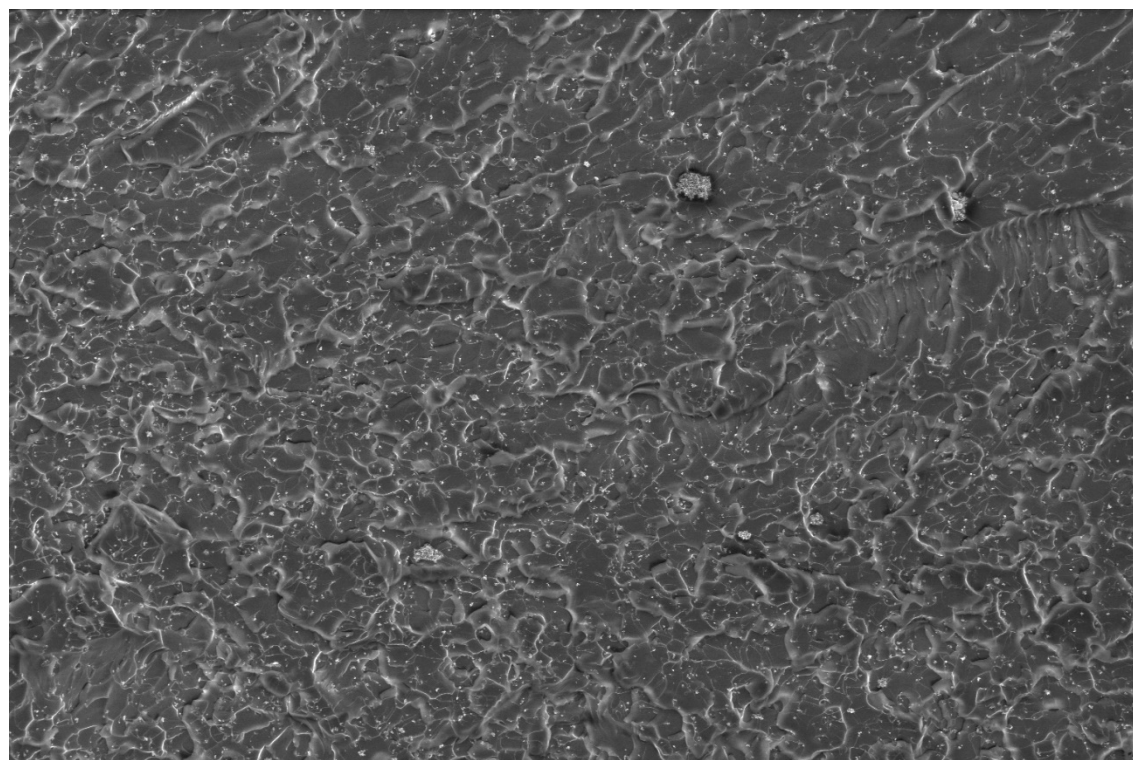

|                                                                                     |             |     |          |         |   |        |          |         |                                                                                                                                               |
|-------------------------------------------------------------------------------------|-------------|-----|----------|---------|---|--------|----------|---------|-----------------------------------------------------------------------------------------------------------------------------------------------|
|  | 3/15/2021   | det | HV       | mag     | □ | HFW    | pressure | WD      | <br>50 µm<br><a href="http://www.wczt.pl">www.wczt.pl</a> |
|                                                                                     | 11:47:24 AM | LFD | 10.00 kV | 1 500 x |   | 276 µm | 70 Pa    | 10.4 mm |                                                                                                                                               |

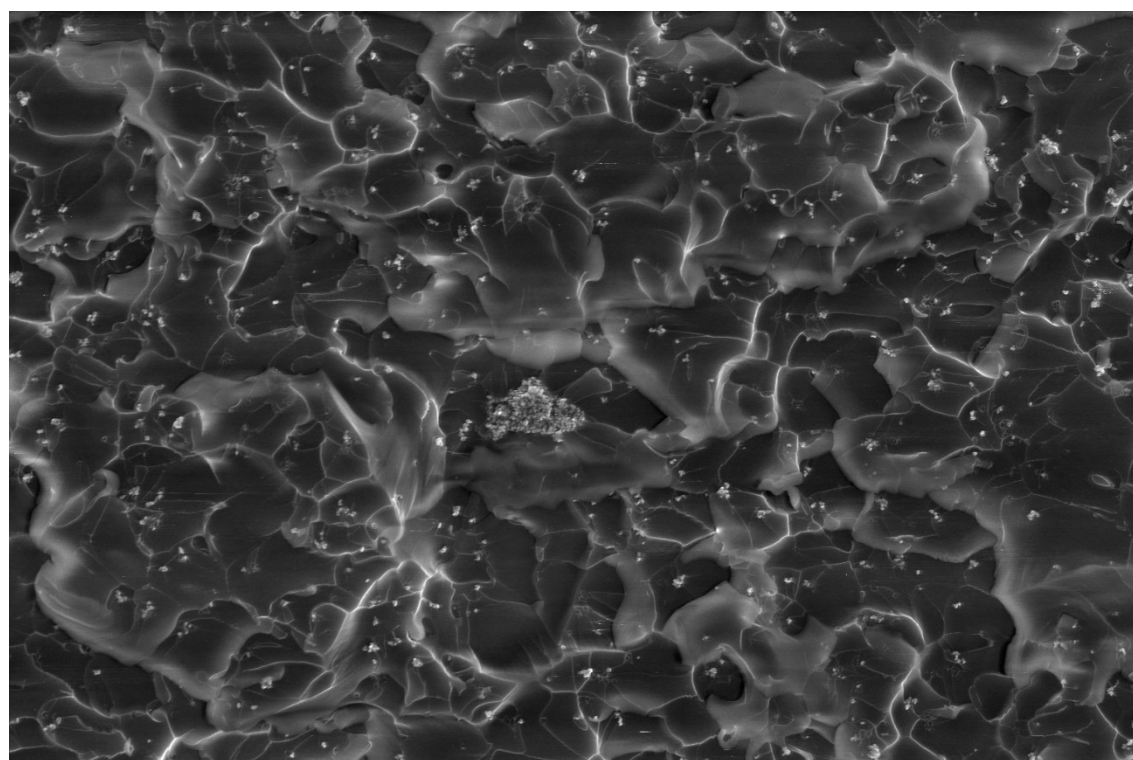

|                                                                                     |             |     |          |         |   |         |          |         |                                                                                                                                               |
|-------------------------------------------------------------------------------------|-------------|-----|----------|---------|---|---------|----------|---------|-----------------------------------------------------------------------------------------------------------------------------------------------|
|  | 3/15/2021   | det | HV       | mag     | □ | HFW     | pressure | WD      | <br>20 µm<br><a href="http://www.wczt.pl">www.wczt.pl</a> |
|                                                                                     | 11:48:38 AM | LFD | 10.00 kV | 5 000 x |   | 82.9 µm | 70 Pa    | 10.4 mm |                                                                                                                                               |

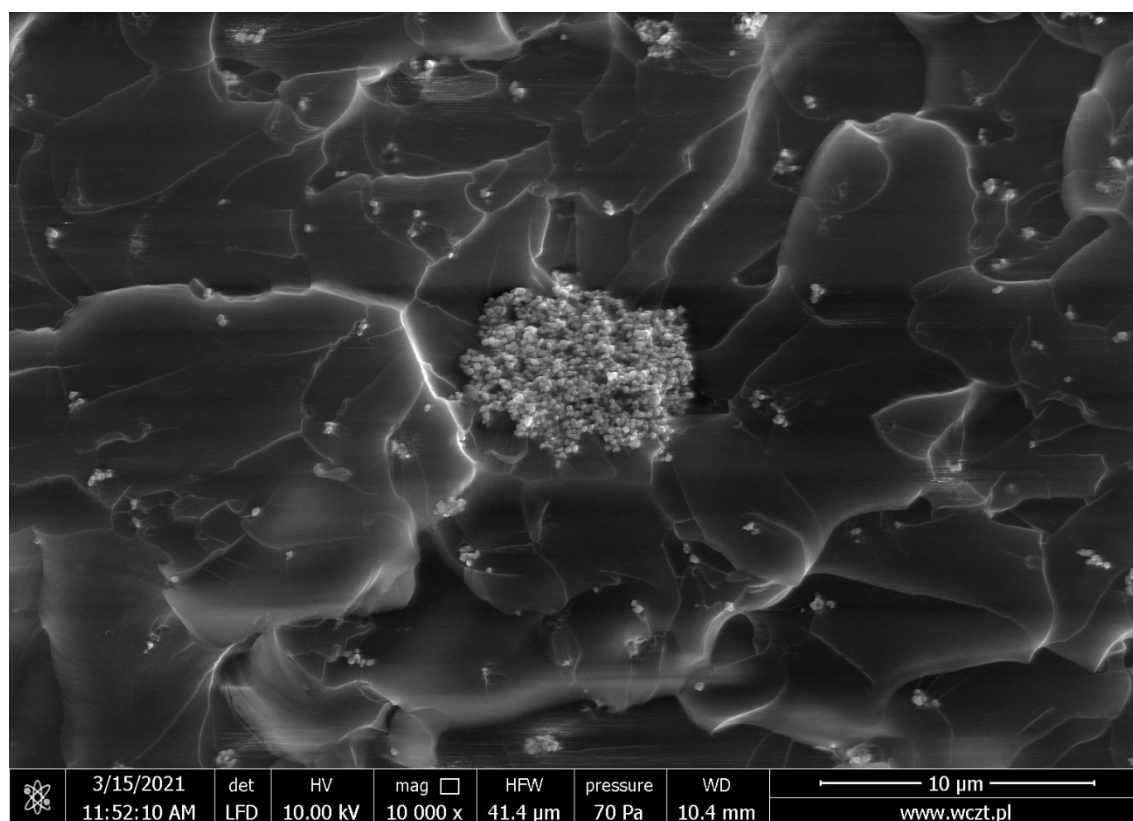

**1%TiO<sub>2</sub>, 1.5% iBu<sub>3</sub>SSQ-OEt, mechanical stirrer**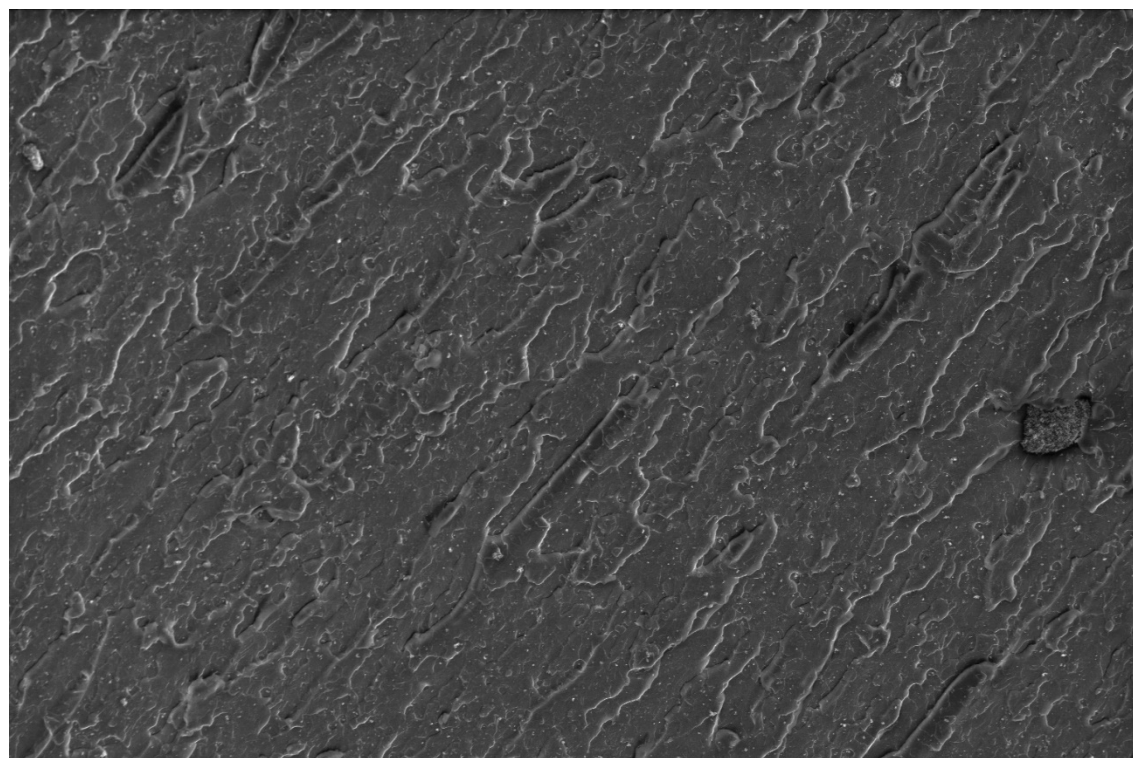

|                                                                                     |             |     |          |         |   |        |          |        |       |
|-------------------------------------------------------------------------------------|-------------|-----|----------|---------|---|--------|----------|--------|-------|
|  | 3/22/2021   | det | HV       | mag     | □ | HFW    | pressure | WD     | 50 µm |
|                                                                                     | 12:14:58 PM | LFD | 10.00 kV | 1 500 x |   | 276 µm | 70 Pa    | 8.8 mm |       |

www.wczt.pl

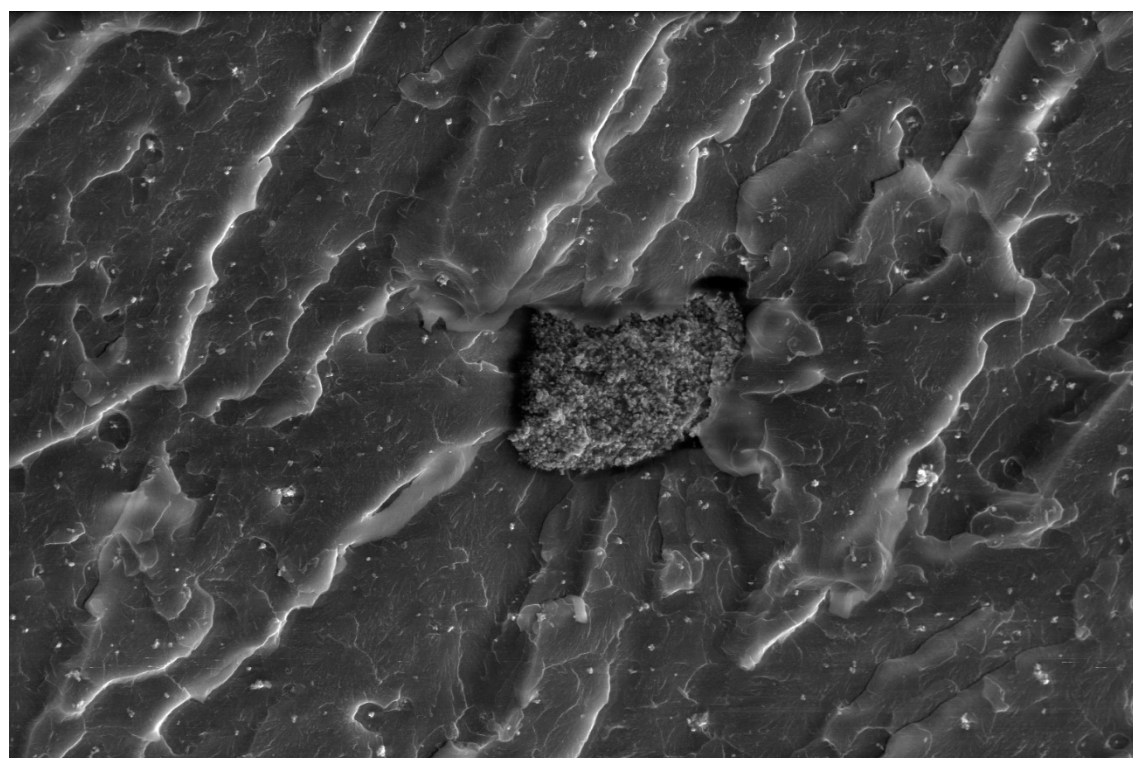

|                                                                                     |             |     |          |         |   |         |          |        |       |
|-------------------------------------------------------------------------------------|-------------|-----|----------|---------|---|---------|----------|--------|-------|
|  | 3/22/2021   | det | HV       | mag     | □ | HFW     | pressure | WD     | 20 µm |
|                                                                                     | 12:15:44 PM | LFD | 10.00 kV | 5 000 x |   | 82.9 µm | 70 Pa    | 8.8 mm |       |

www.wczt.pl



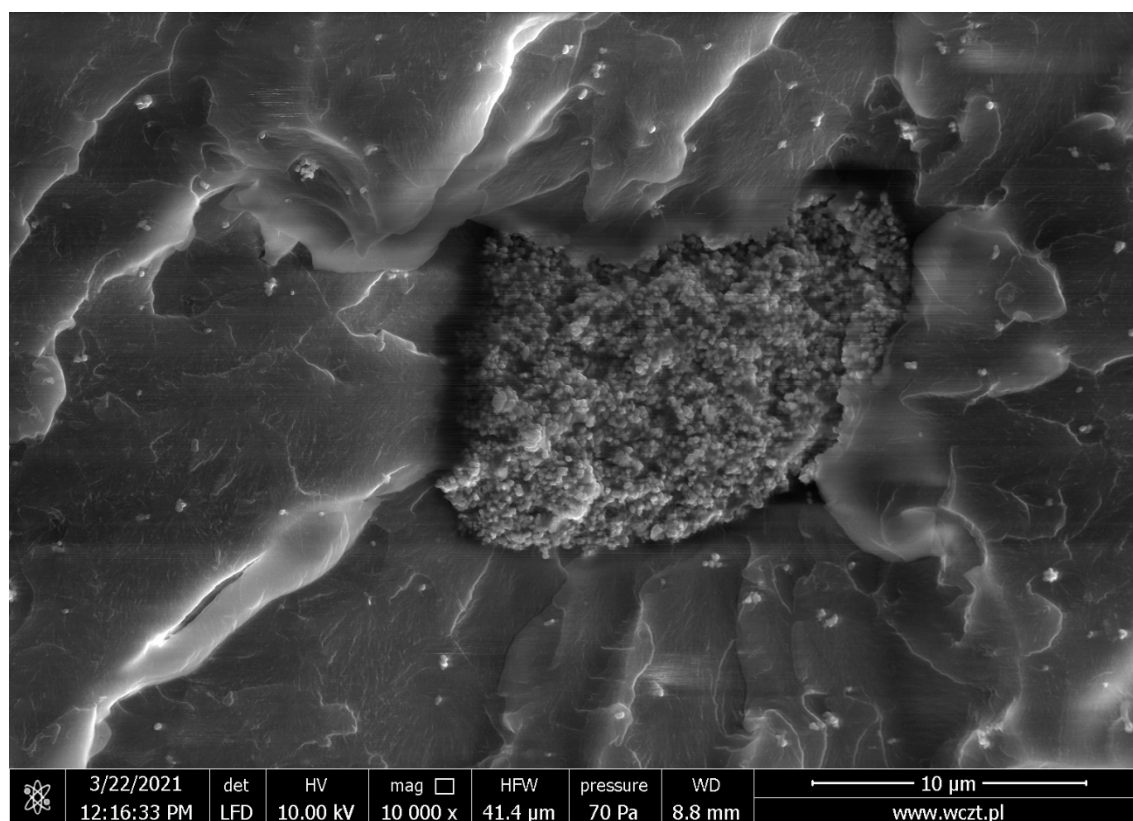

**1%TiO<sub>2</sub>, 1.5% iBu<sub>2</sub>SSQ-OEt, mixing pump**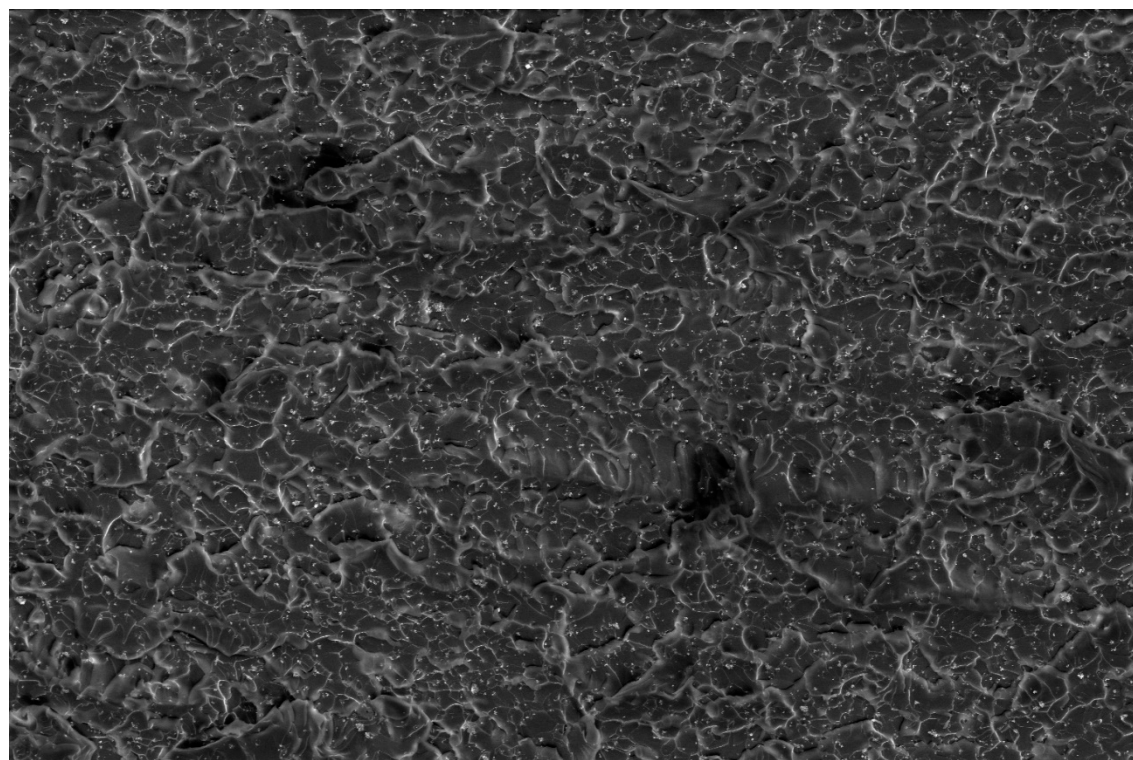

|                                                                                     |             |     |          |         |   |        |          |         |                                                                                                                                               |
|-------------------------------------------------------------------------------------|-------------|-----|----------|---------|---|--------|----------|---------|-----------------------------------------------------------------------------------------------------------------------------------------------|
|  | 3/15/2021   | det | HV       | mag     | □ | HFW    | pressure | WD      | <br>50 µm<br><a href="http://www.wczt.pl">www.wczt.pl</a> |
|                                                                                     | 11:58:30 AM | LFD | 10.00 kV | 1 500 x |   | 276 µm | 70 Pa    | 10.4 mm |                                                                                                                                               |

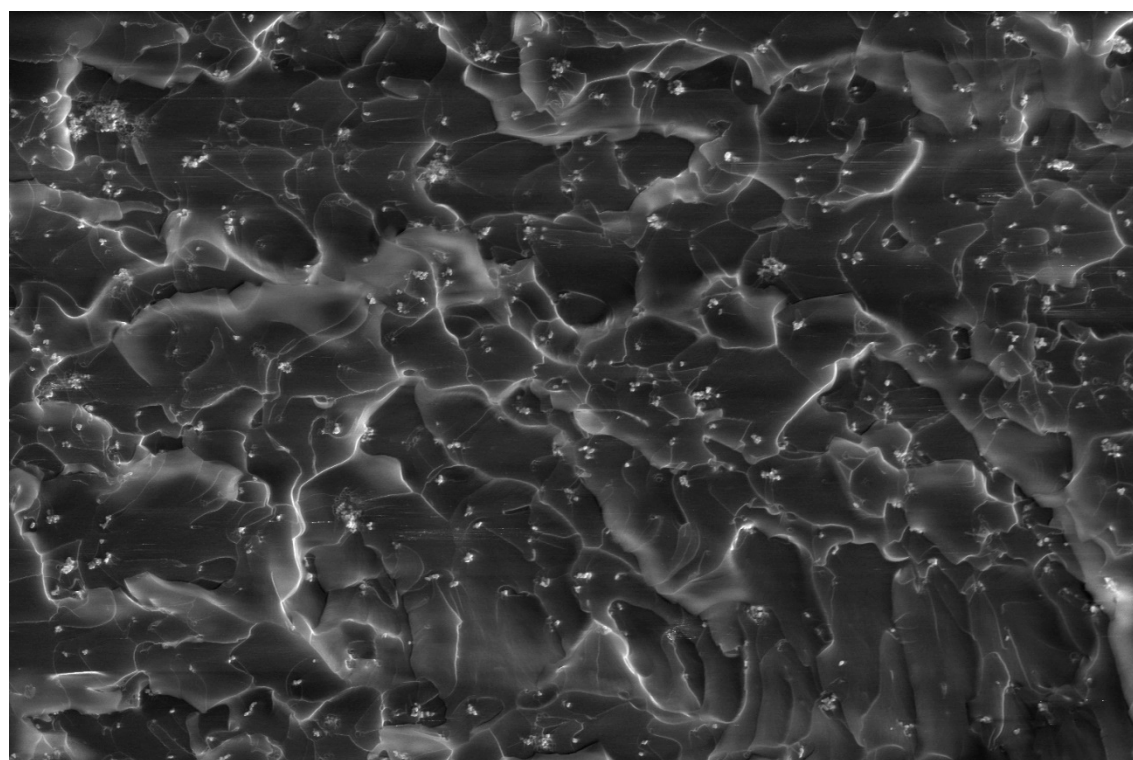

|                                                                                     |             |     |          |         |   |         |          |         |                                                                                                                                               |
|-------------------------------------------------------------------------------------|-------------|-----|----------|---------|---|---------|----------|---------|-----------------------------------------------------------------------------------------------------------------------------------------------|
|  | 3/15/2021   | det | HV       | mag     | □ | HFW     | pressure | WD      | <br>20 µm<br><a href="http://www.wczt.pl">www.wczt.pl</a> |
|                                                                                     | 12:01:03 PM | LFD | 10.00 kV | 5 000 x |   | 82.9 µm | 70 Pa    | 10.4 mm |                                                                                                                                               |

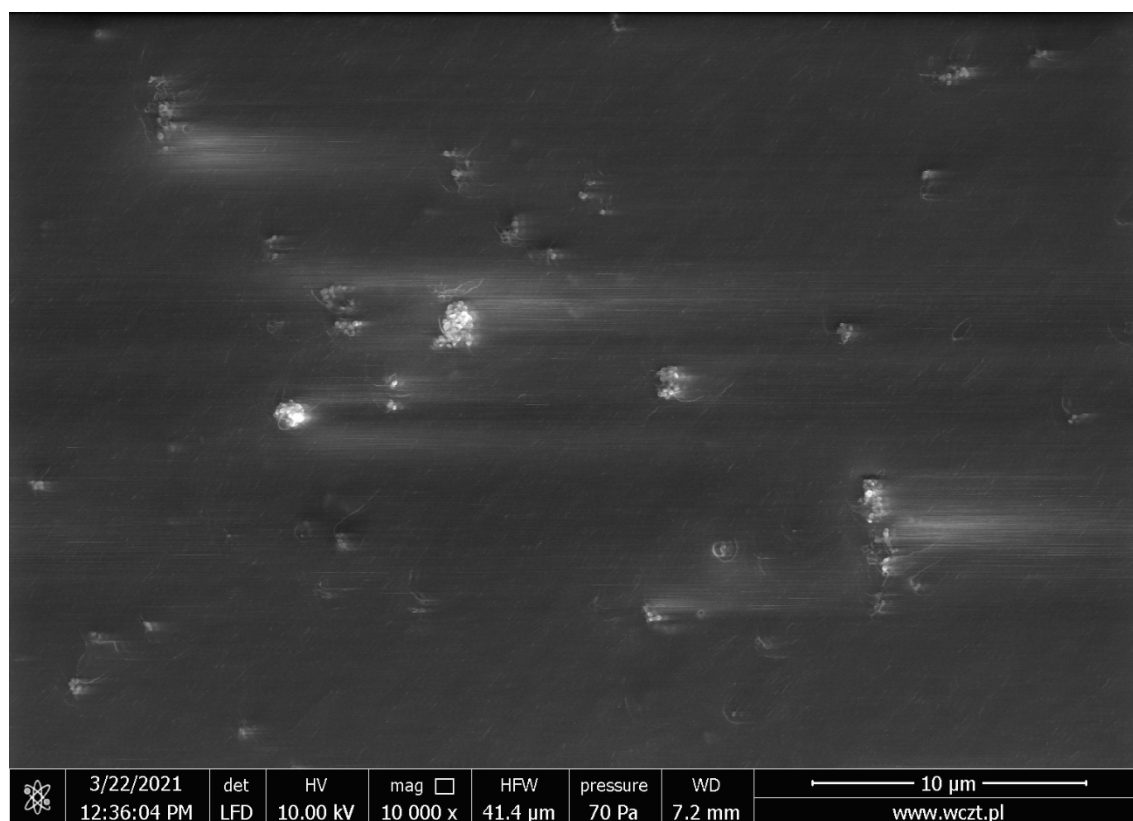

**2%TiO<sub>2</sub>, 1.5% iBu<sub>3</sub>SSQ-OEt, mixing pump**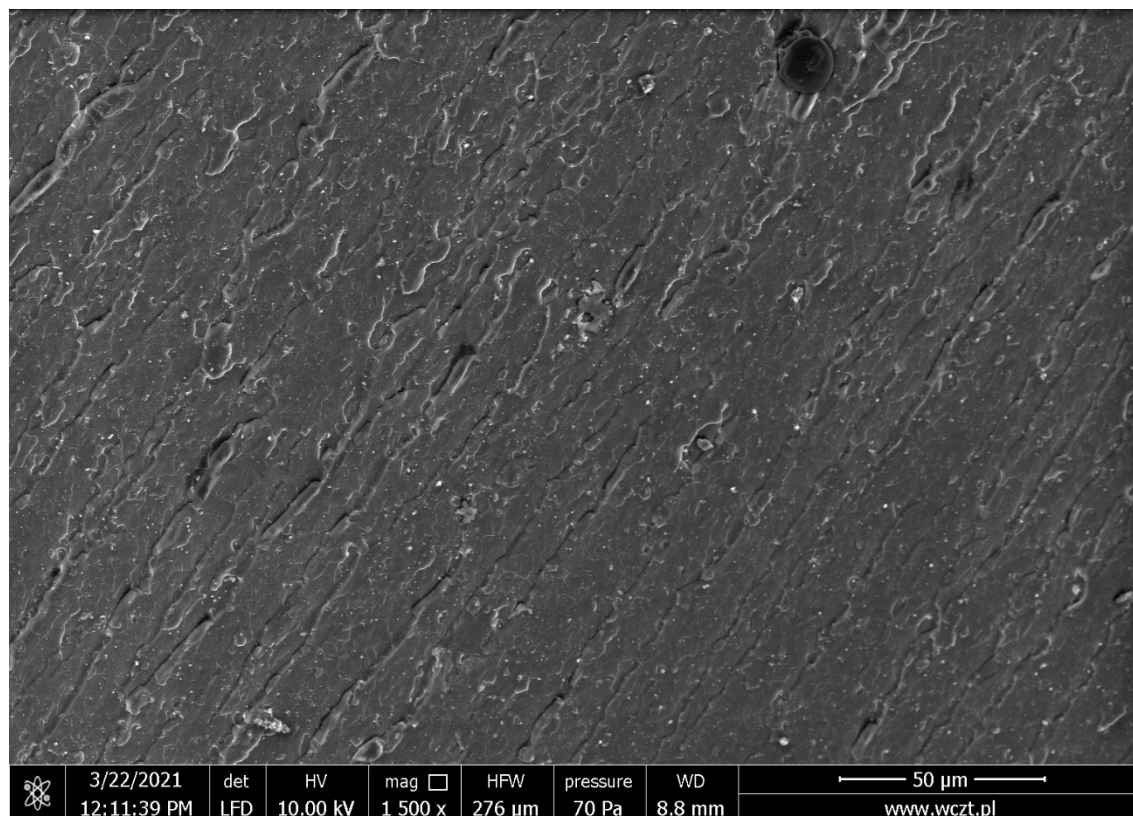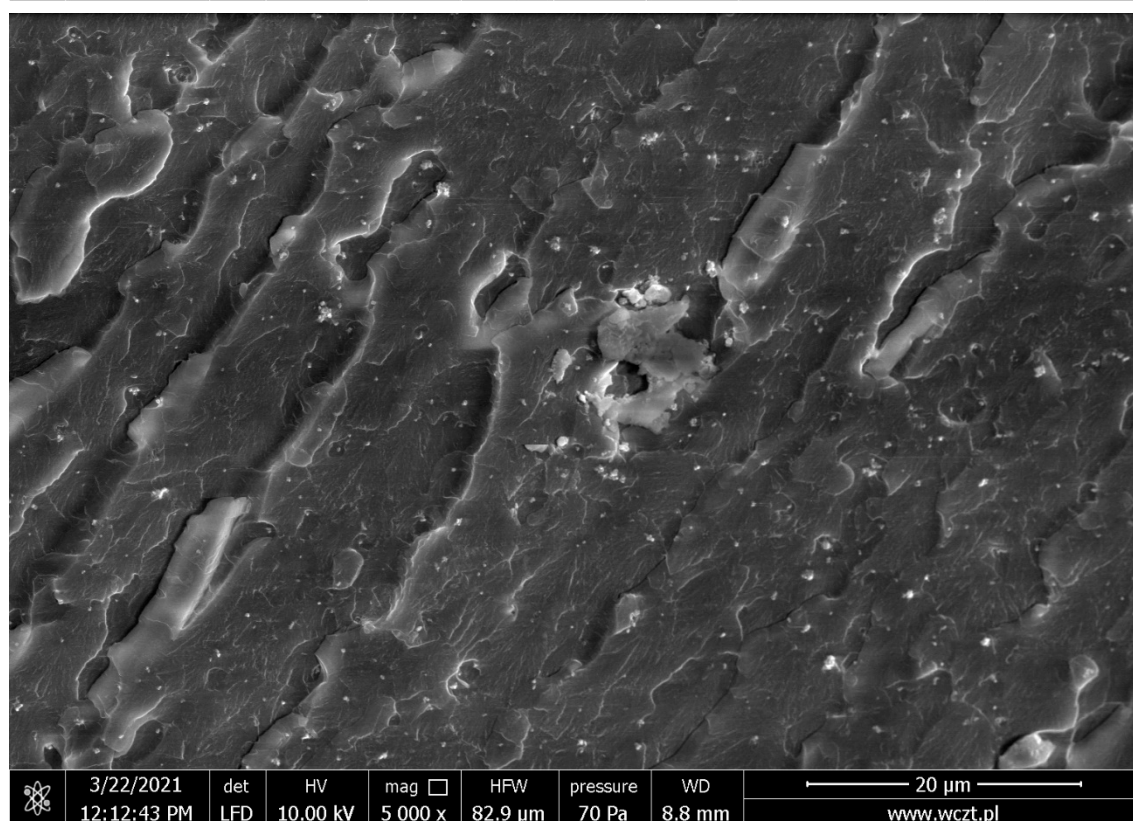

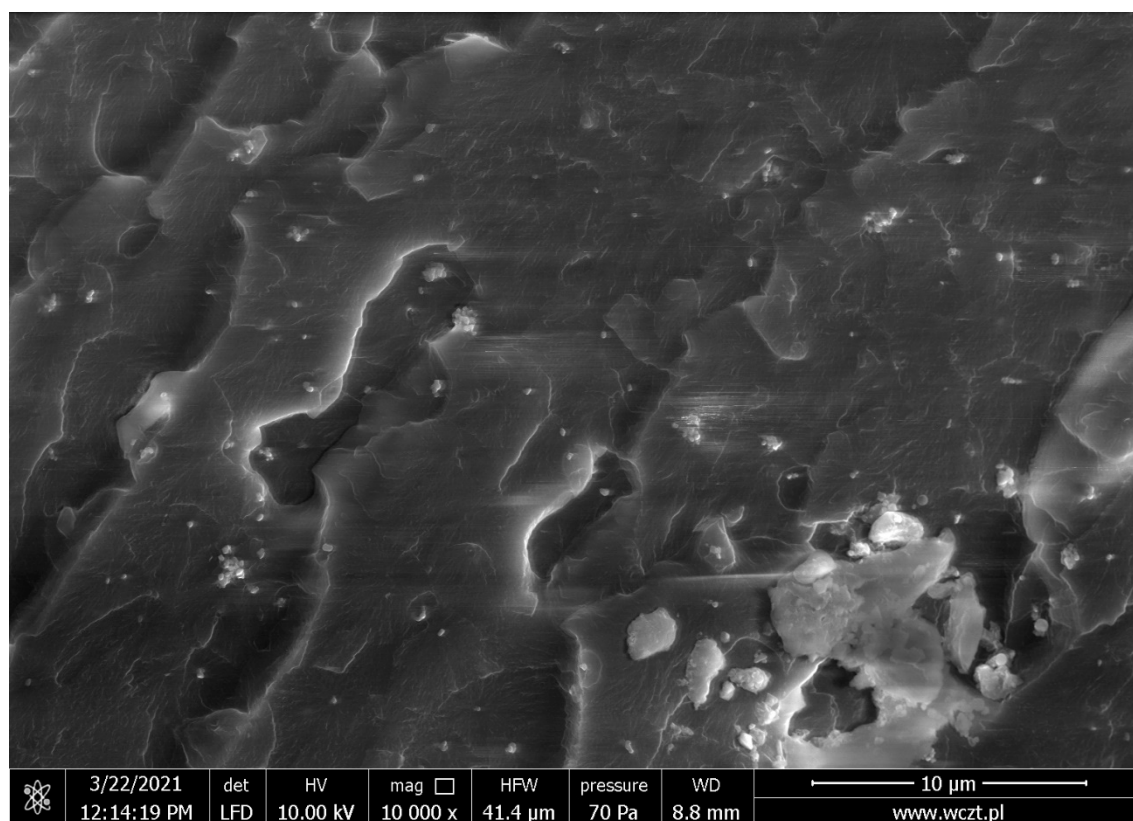

1%TiO<sub>2</sub>, 0.5% SS-6GP-2TMOS, mixing pump

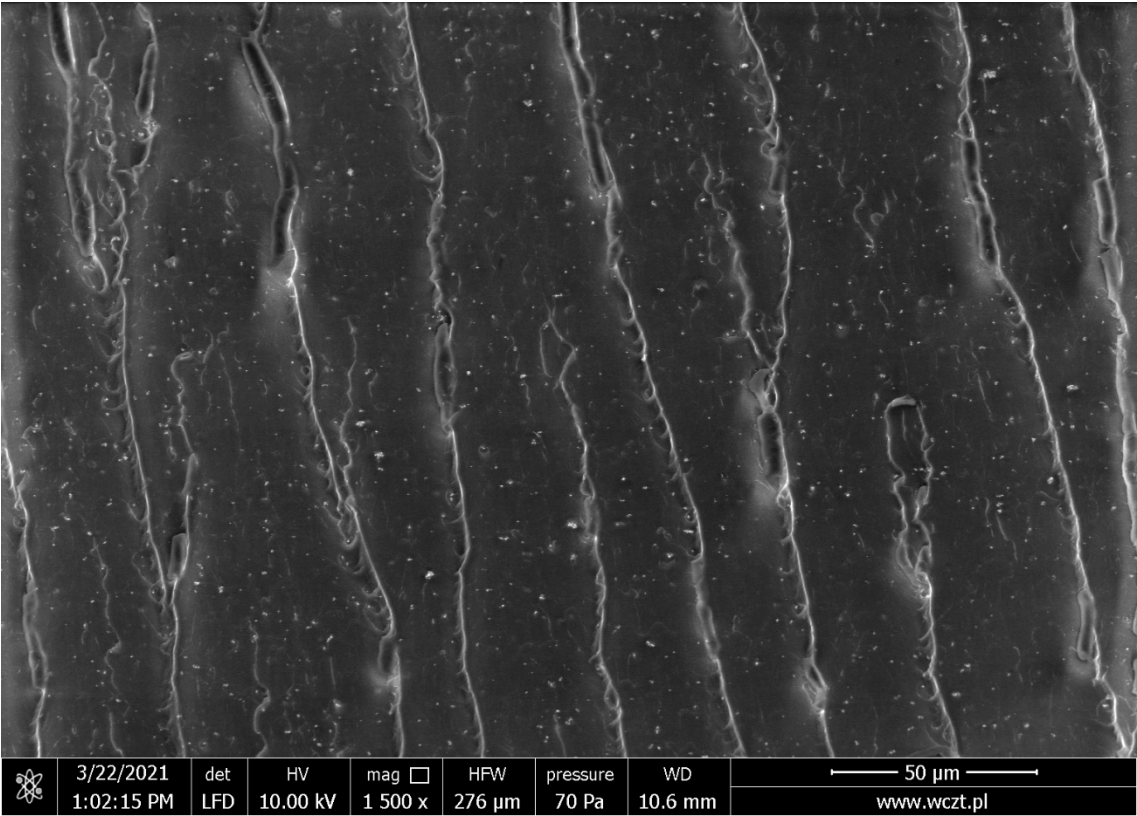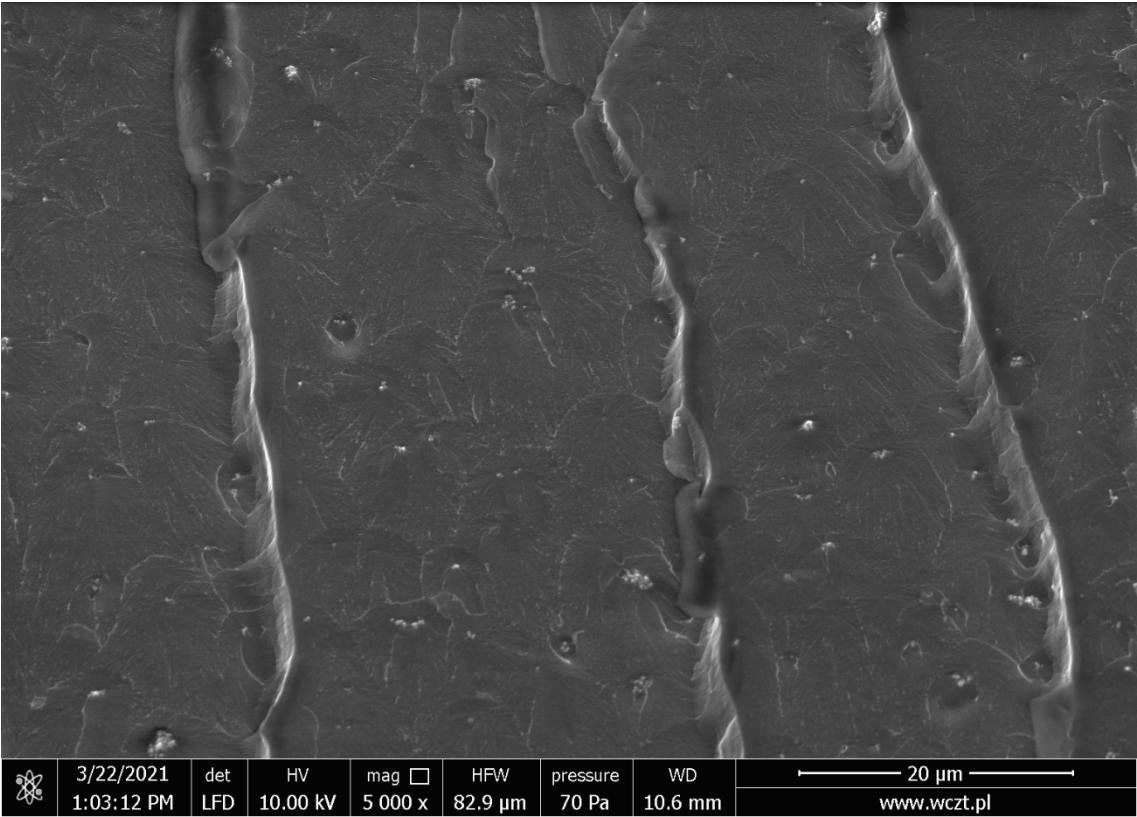



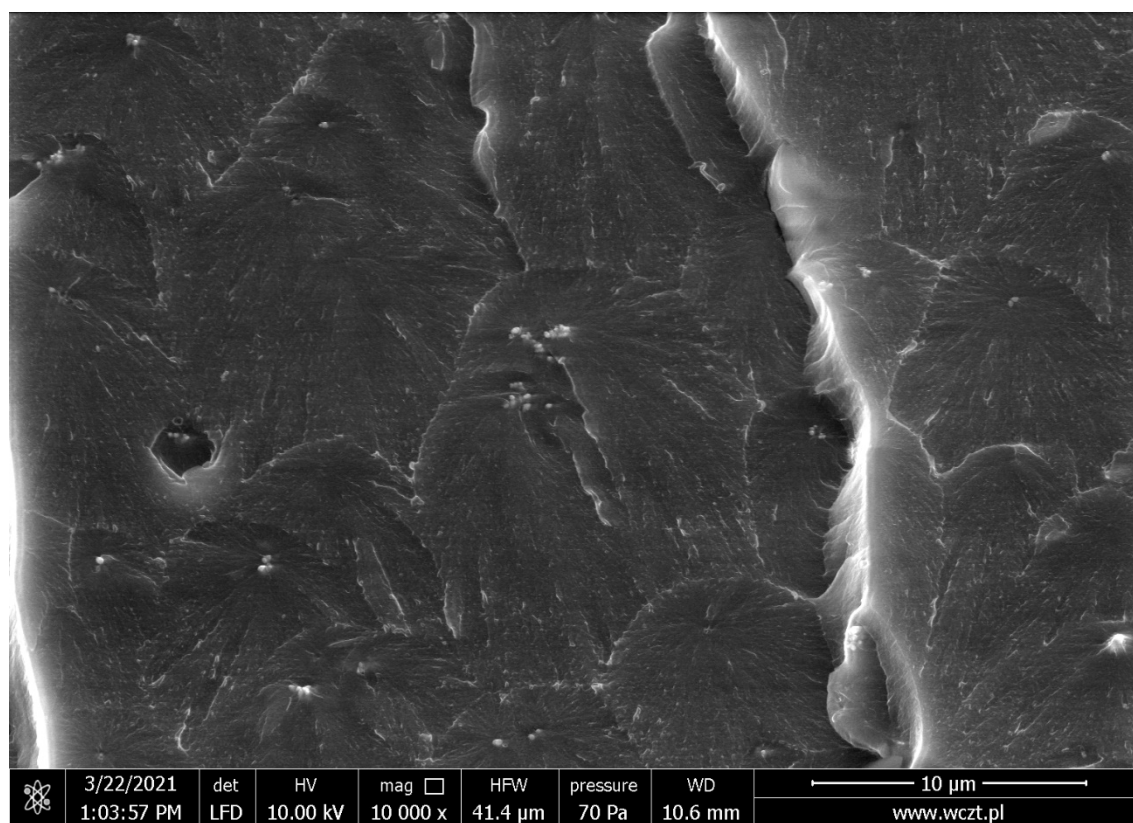



2%TiO<sub>2</sub>, 0.5% SS-6GP-2TMOS, mixing pump

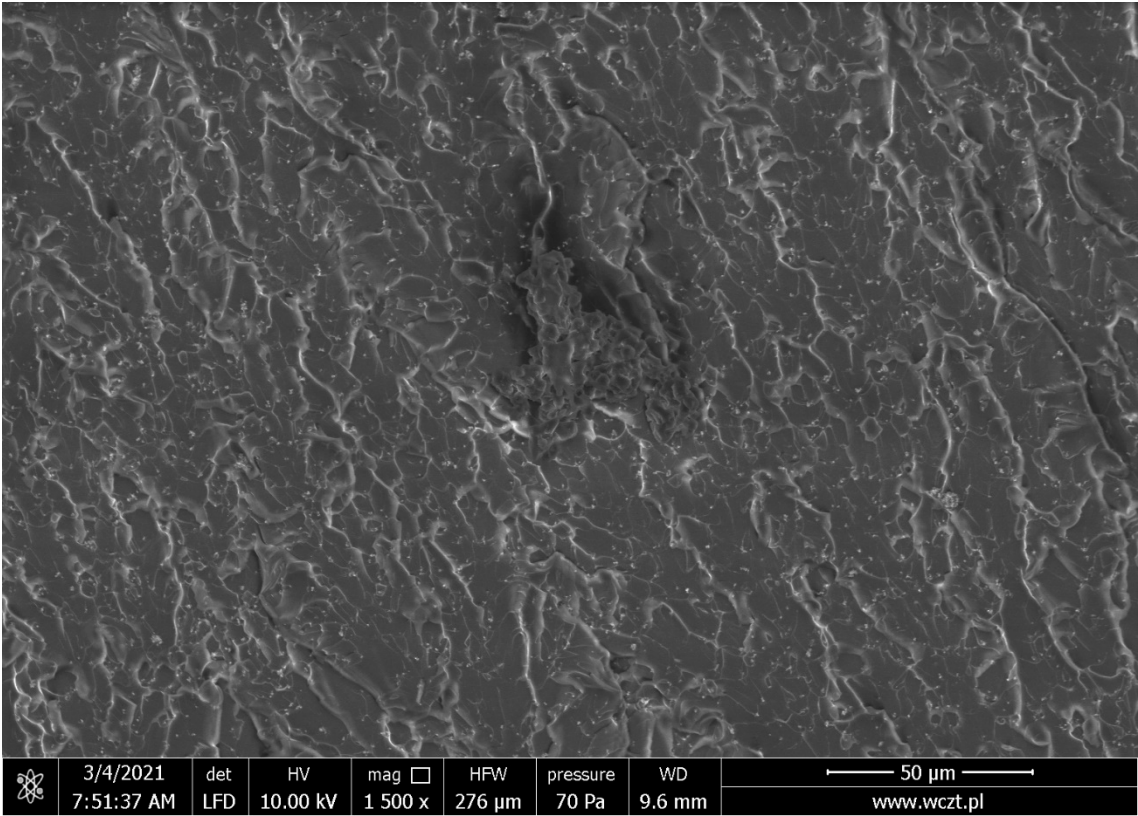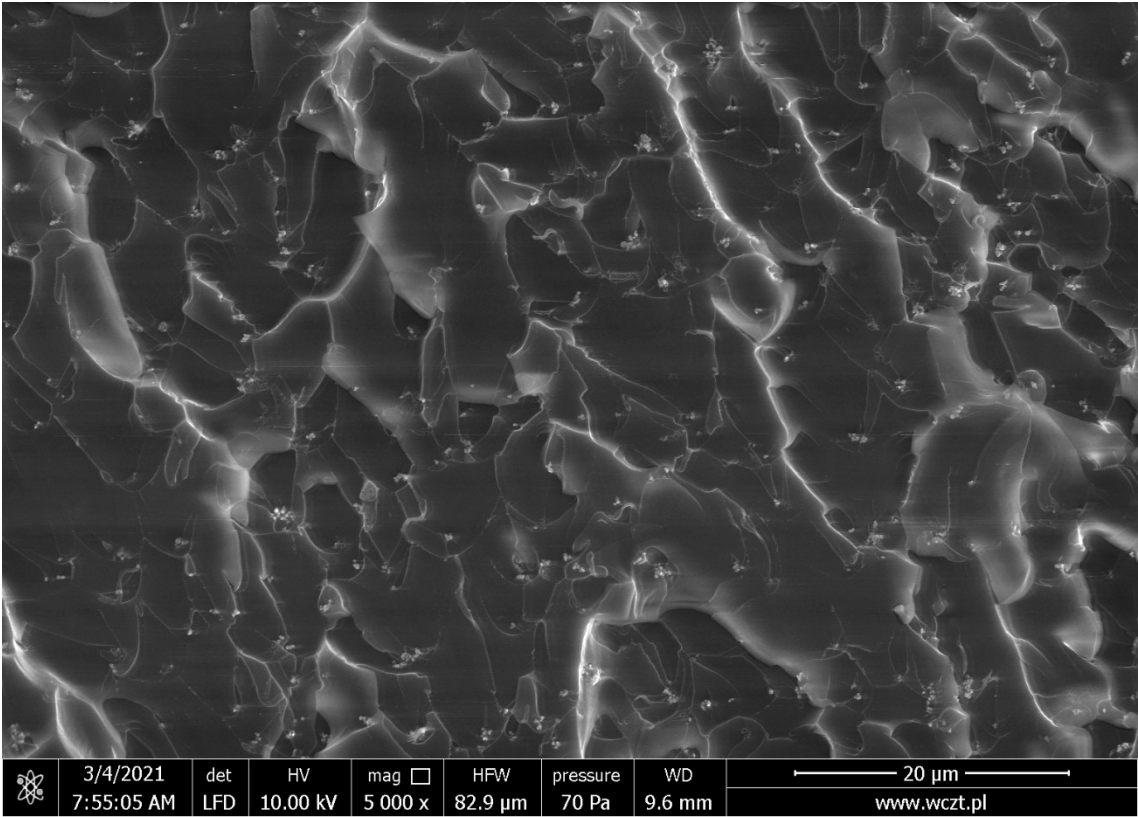

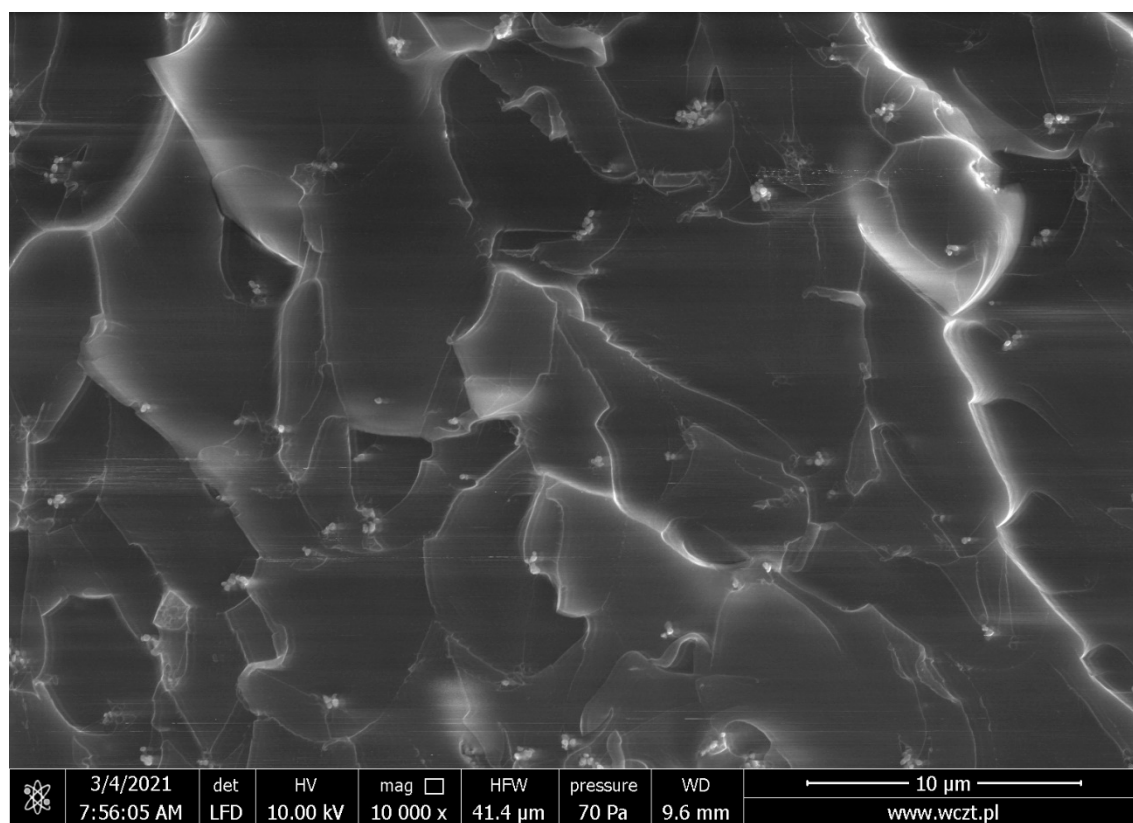

**1%TiO<sub>2</sub>, 1.5% SS-6GP-2TMOS, mechanical stirrer**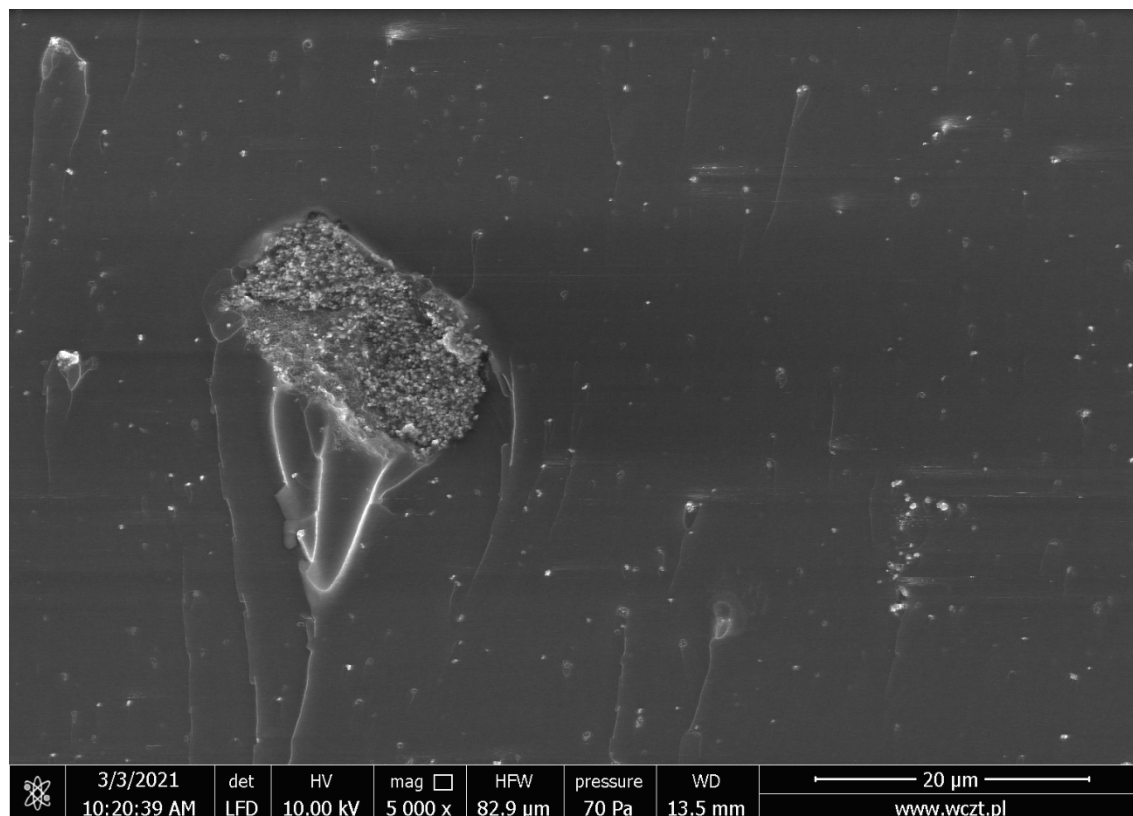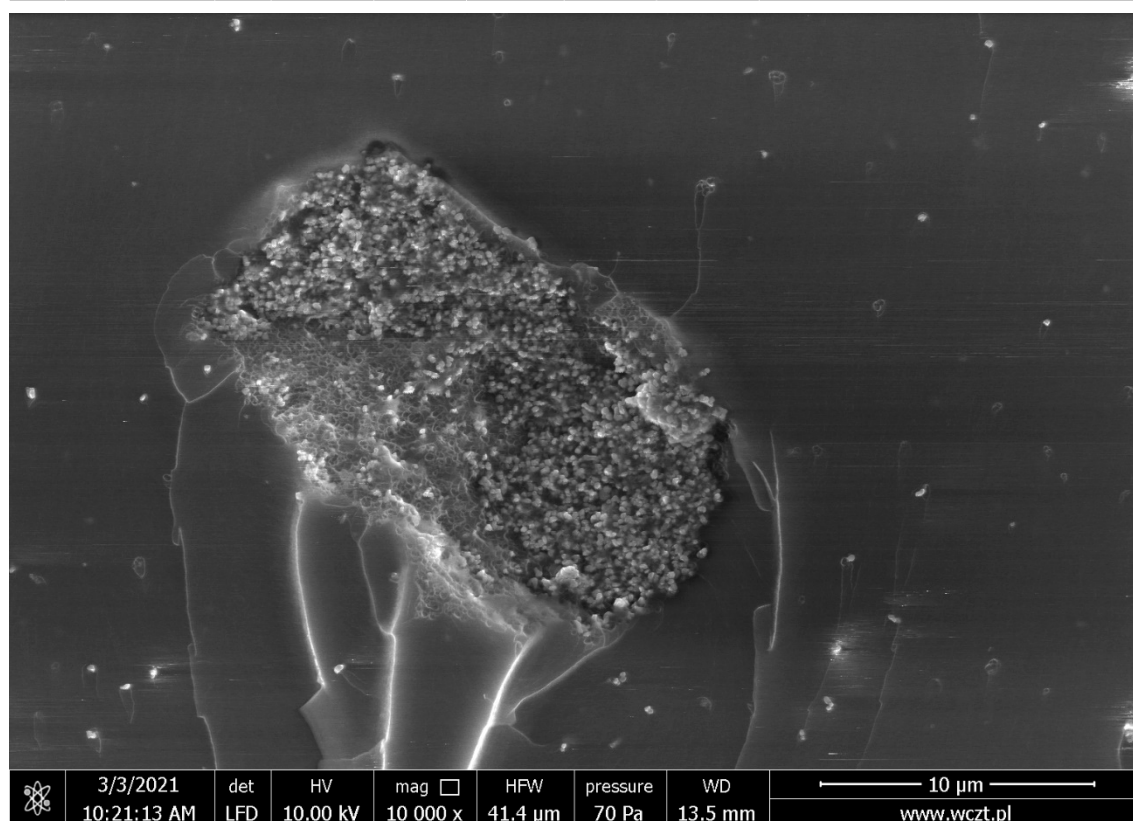

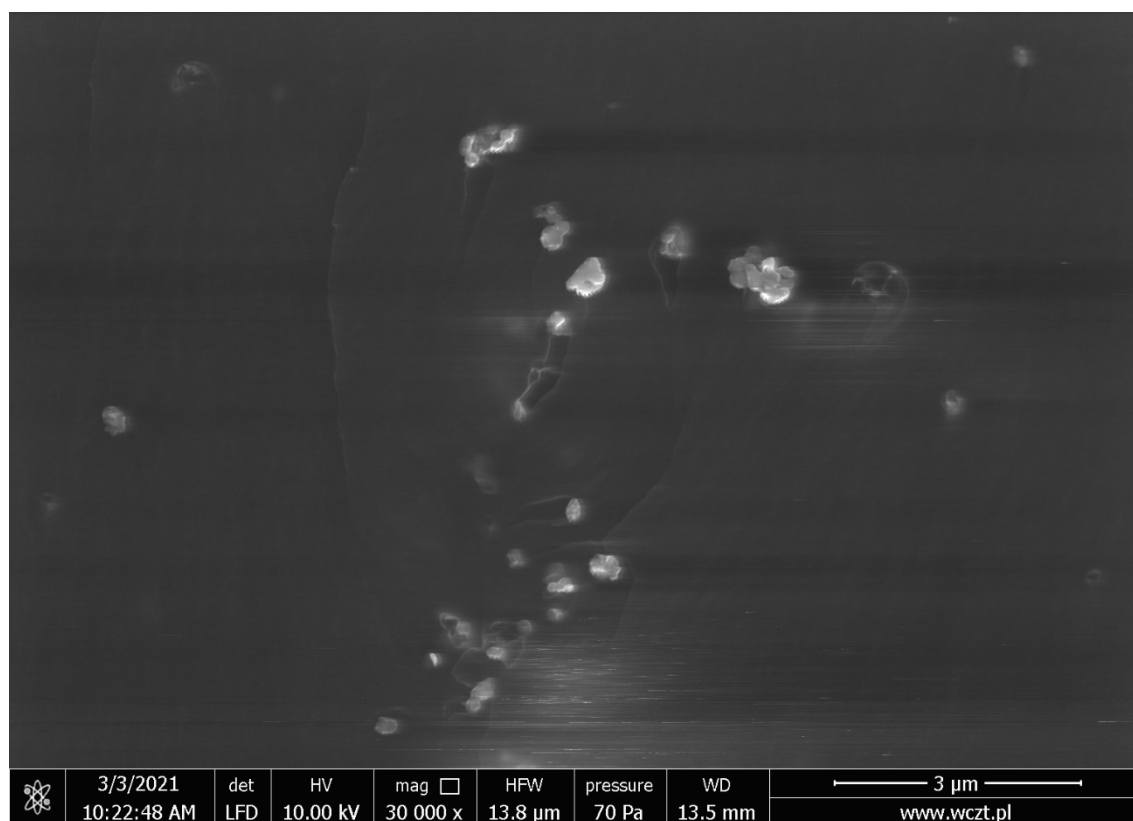

**1%TiO<sub>2</sub>, 1.5% SS-6GP-2TMOS, mixing pump**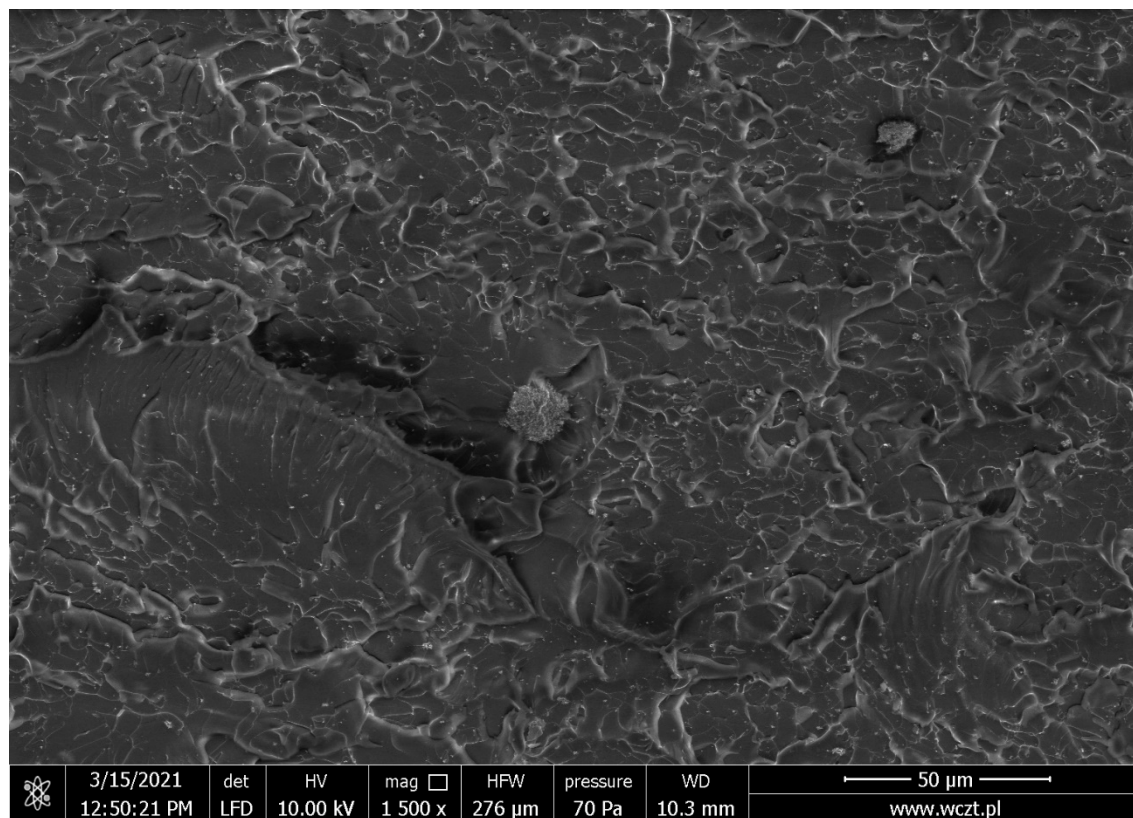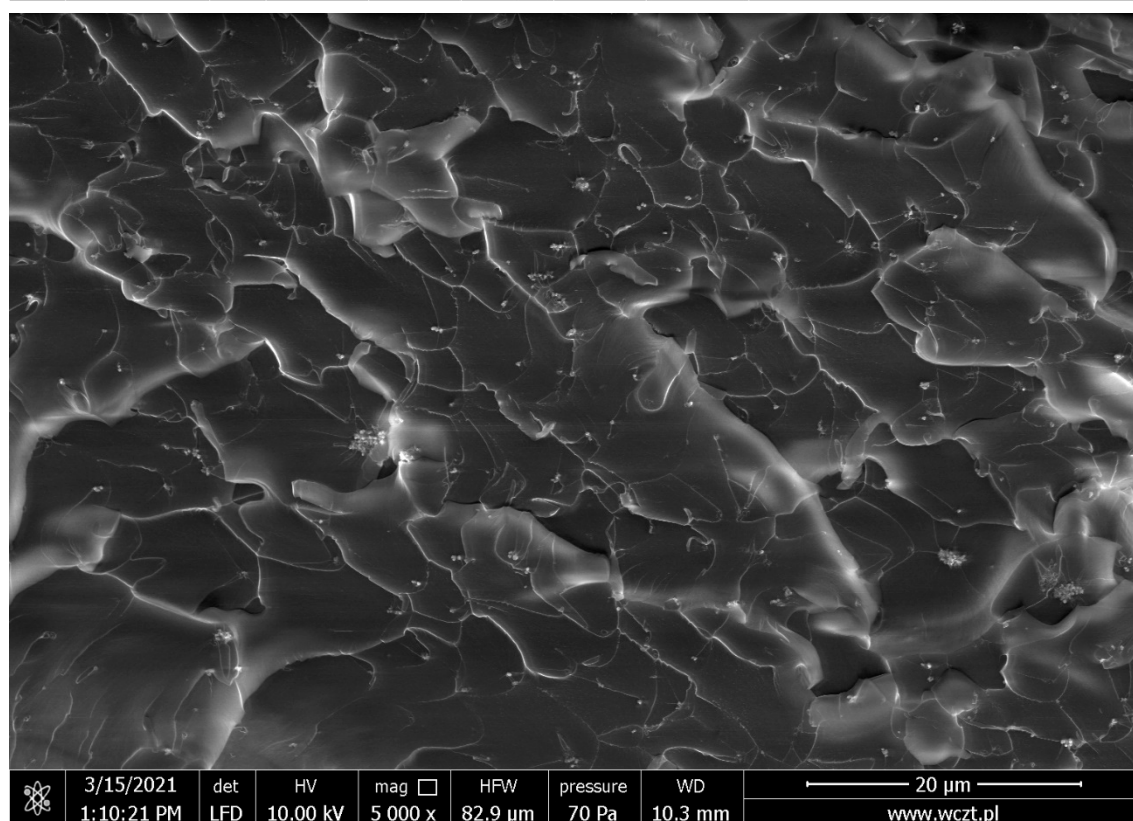

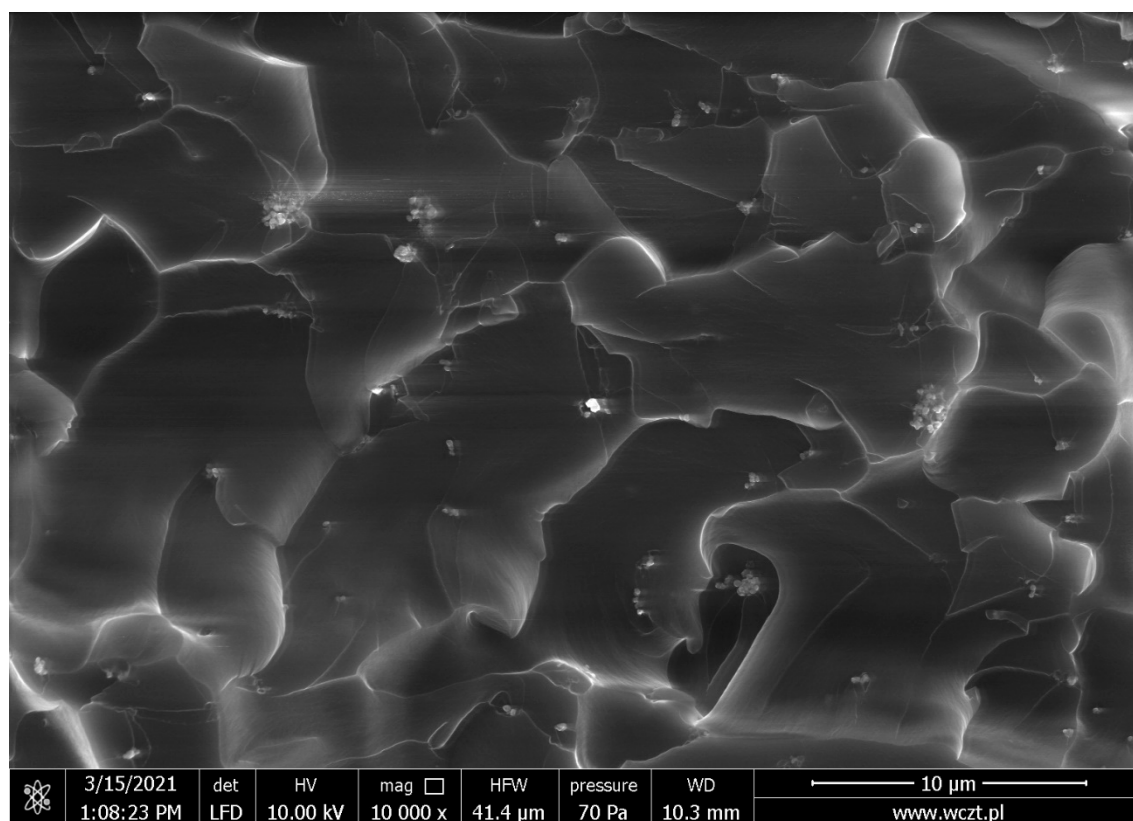



2%TiO<sub>2</sub>, 1.5% SS-6GP-2TMOS, mixing pump

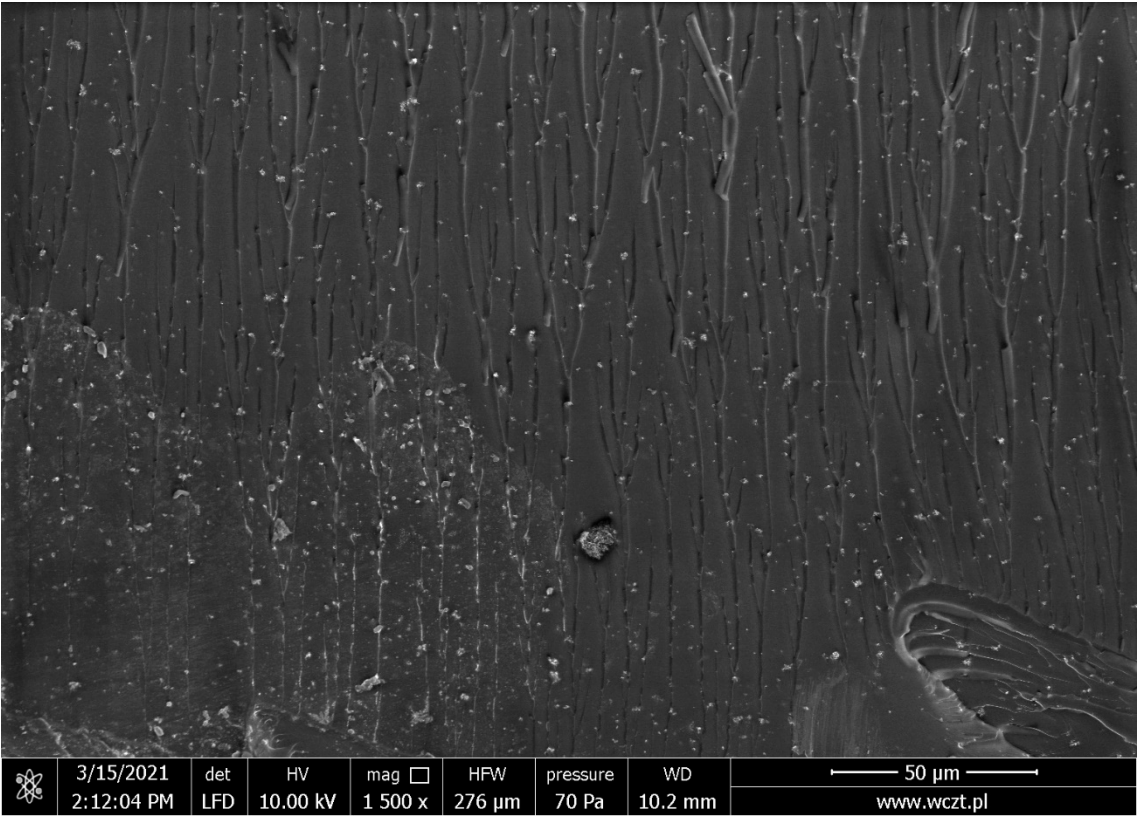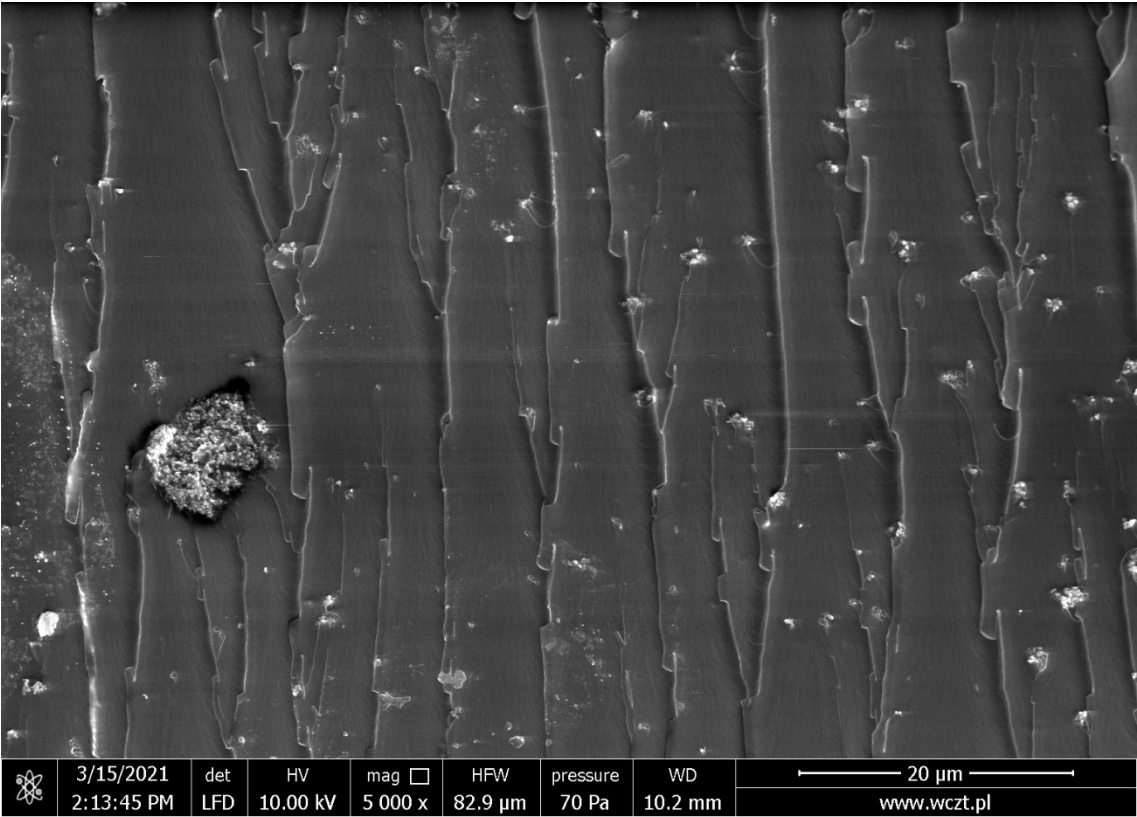



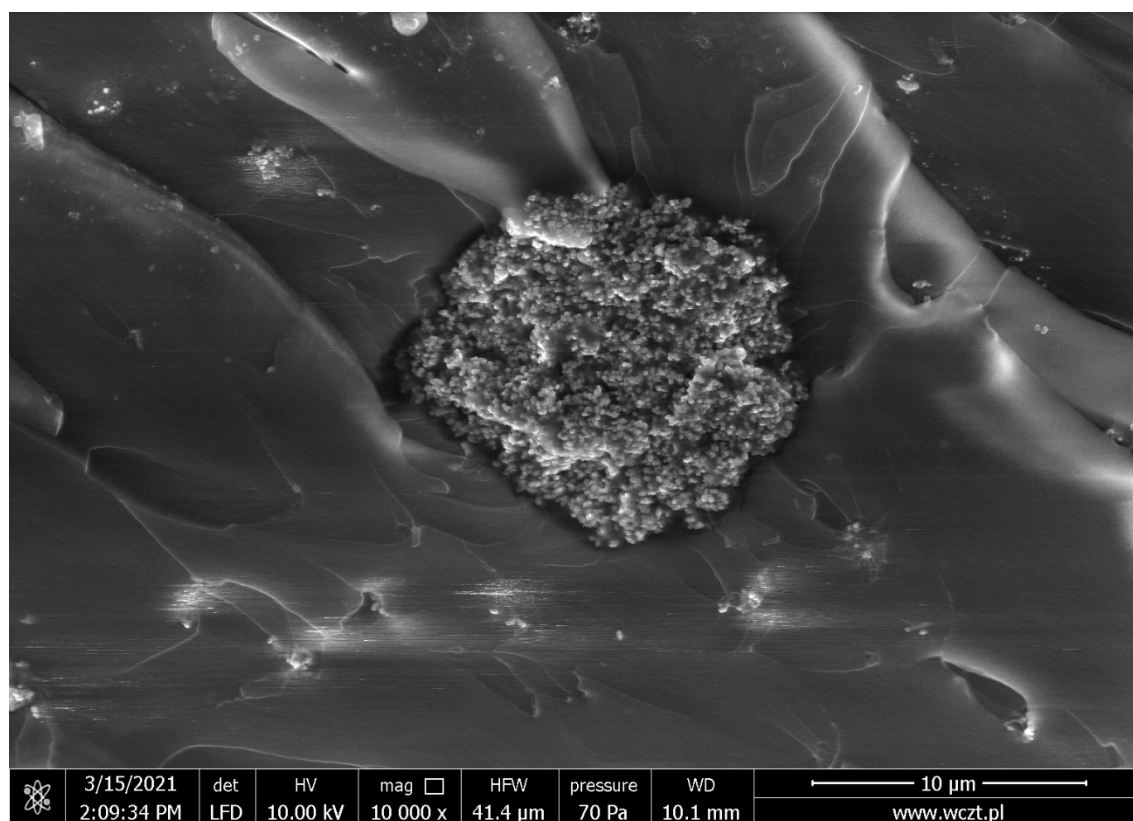

1%TiO<sub>2</sub>, 0.5% SS-5GP-3TMOS, mixing pump

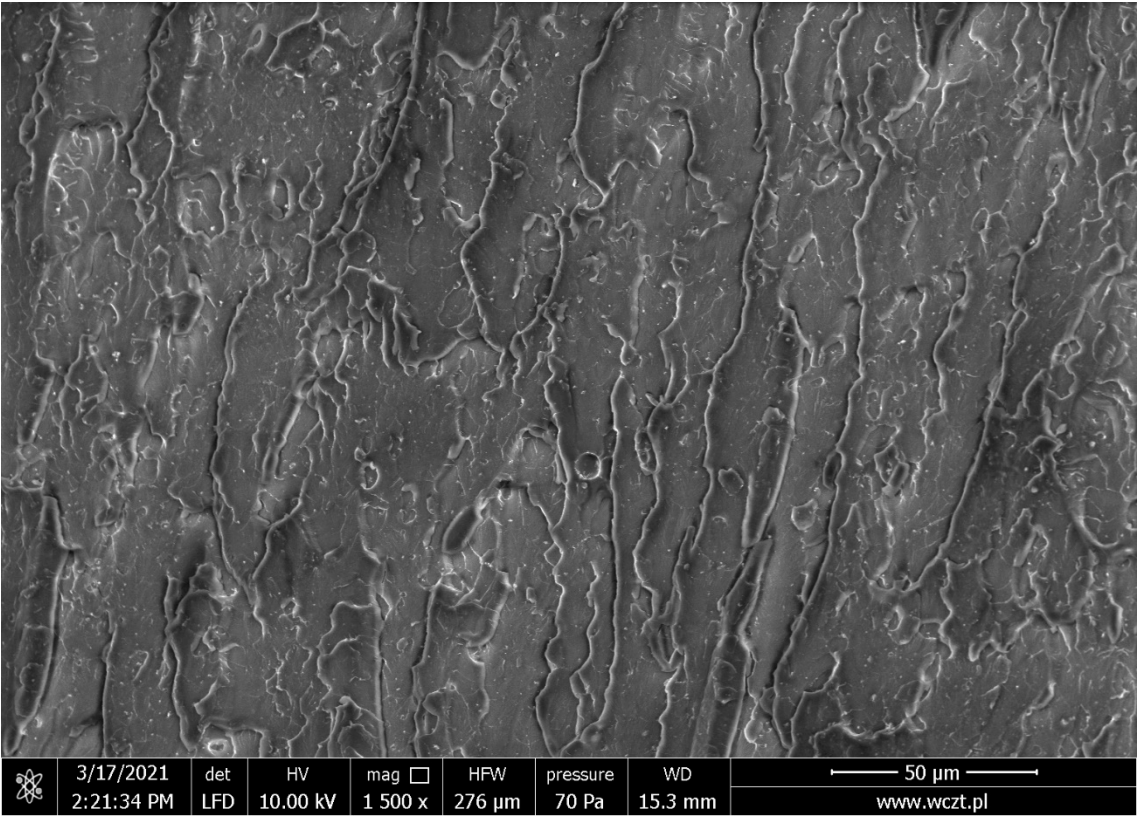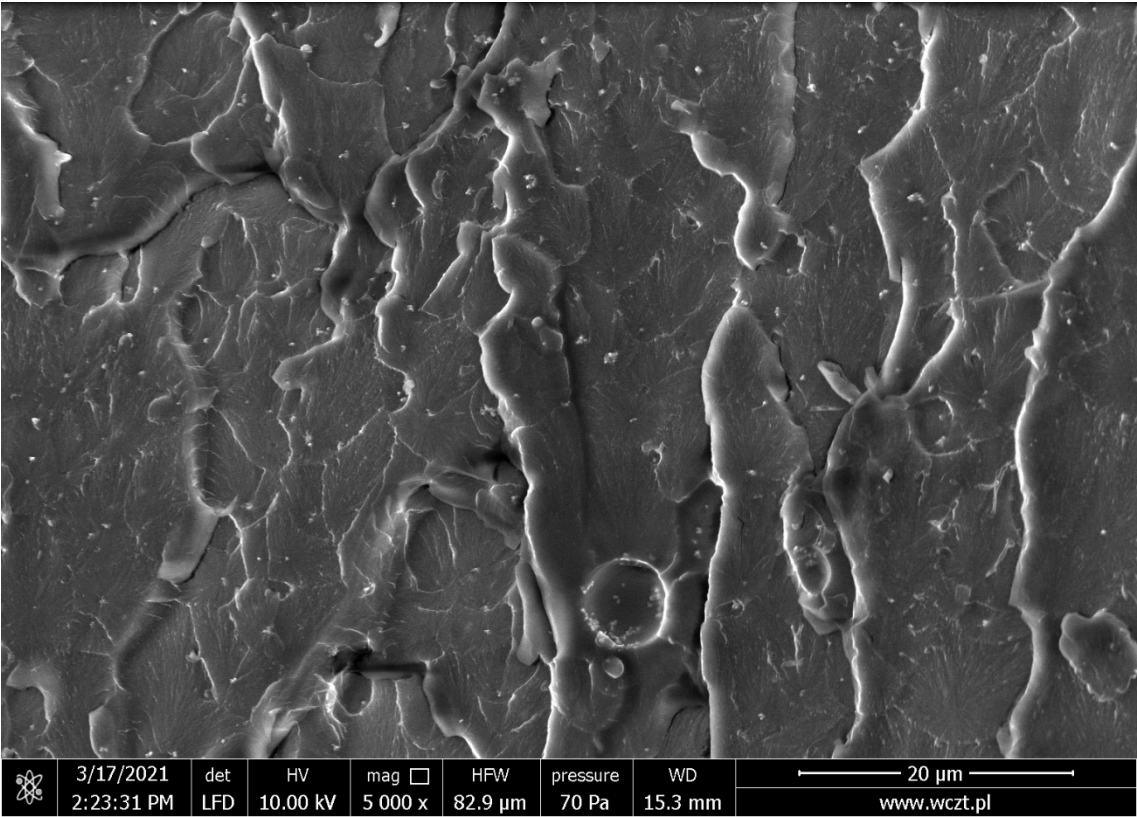

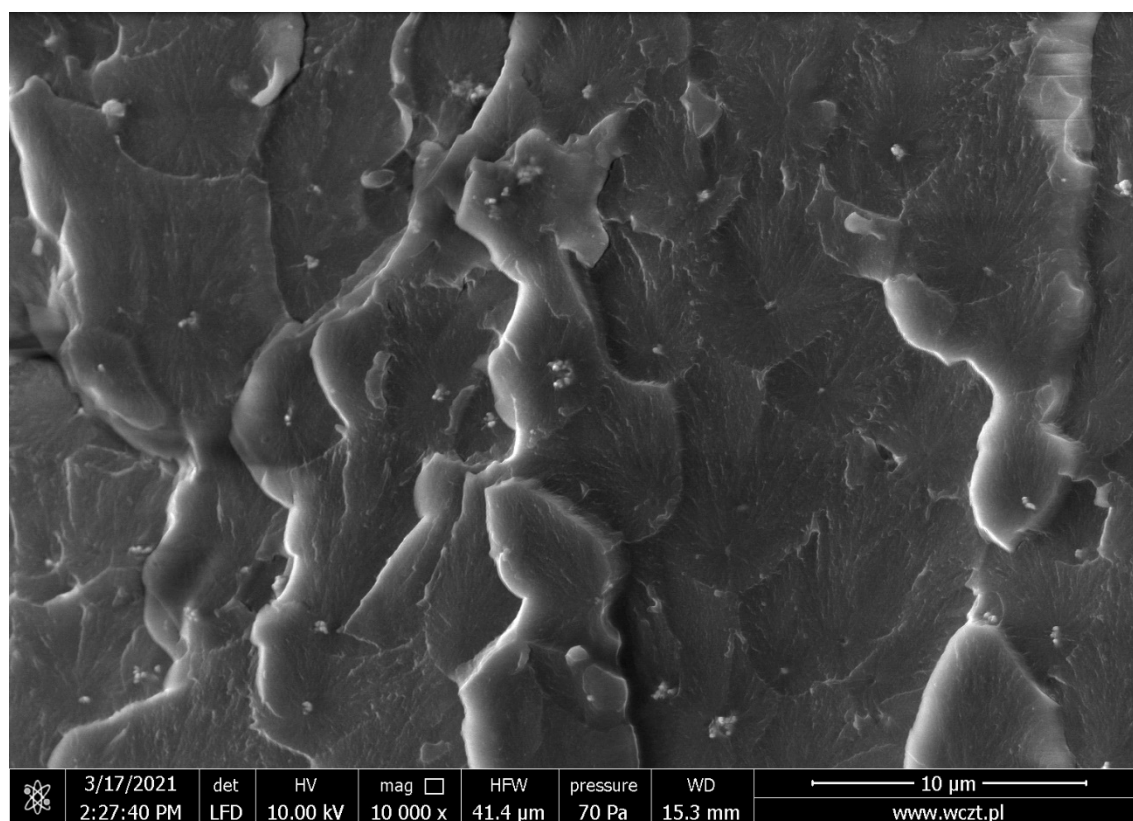

**2%TiO<sub>2</sub>, 0.5% SS-5GP-3TMOS, mixing pump**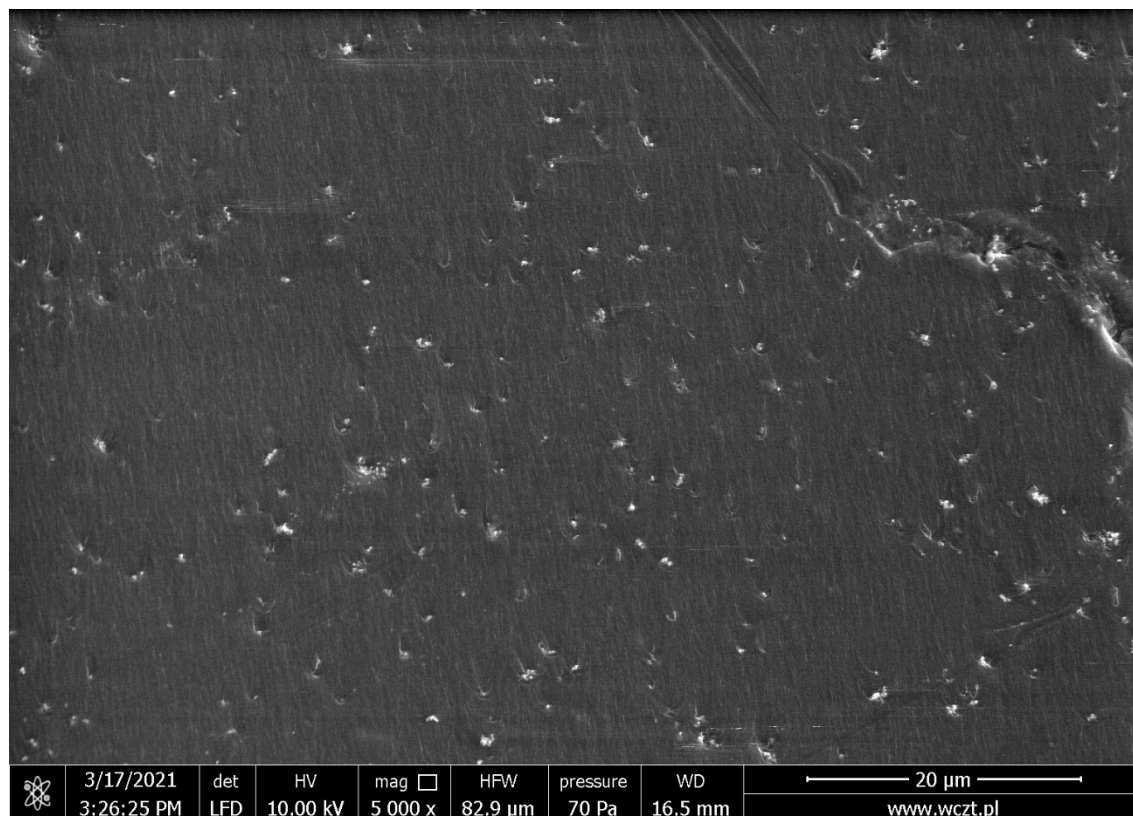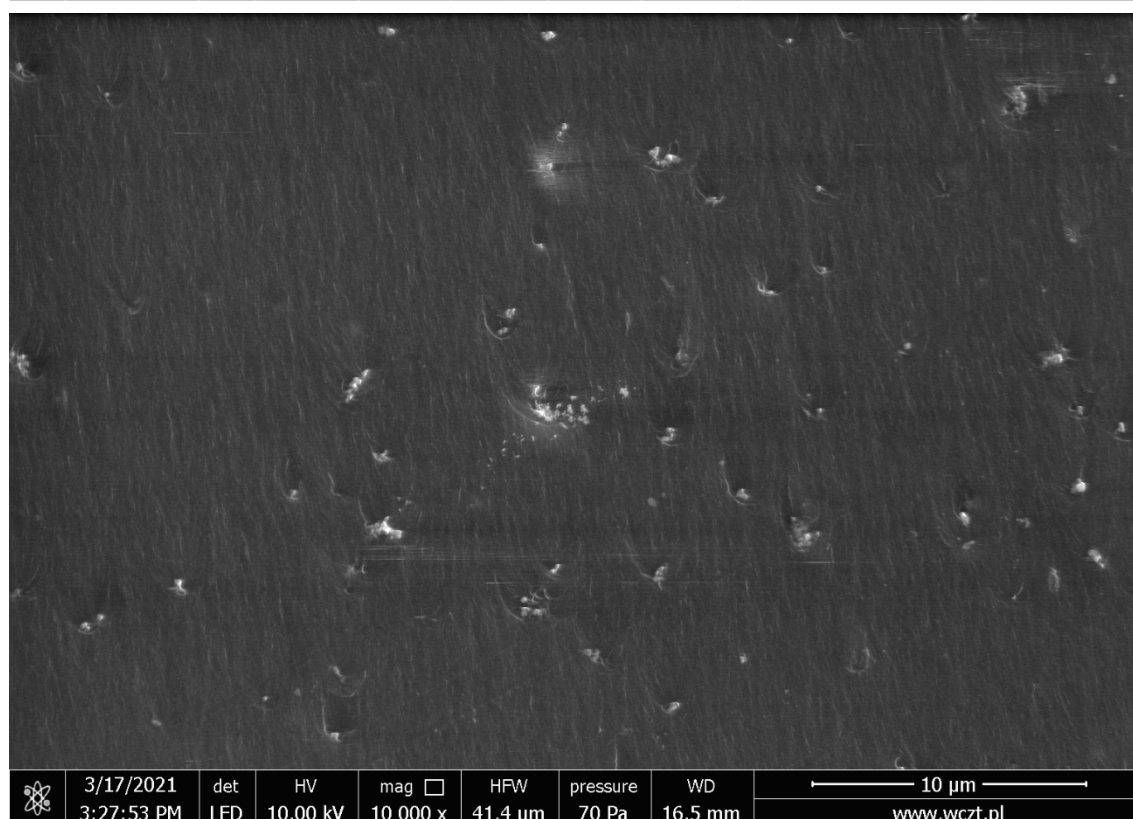

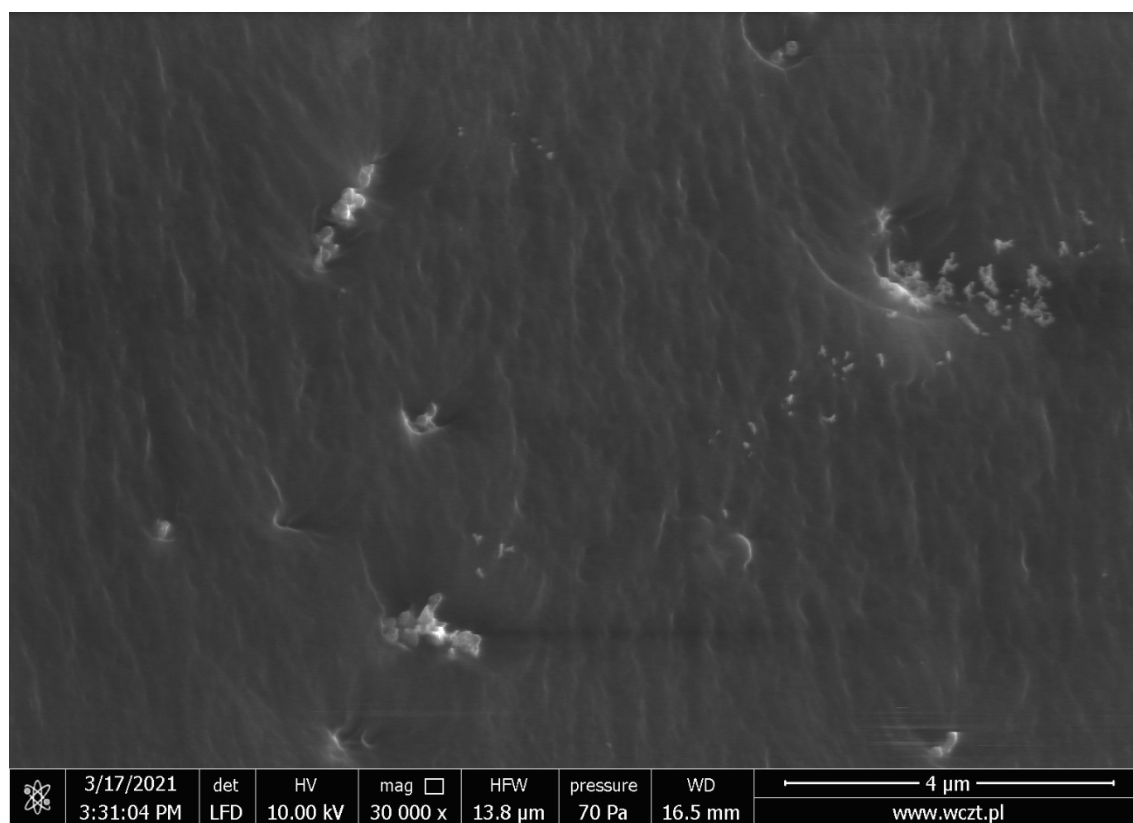

**1%TiO<sub>2</sub>, 1.5% SS-5GP-3TMOS, mixing pump**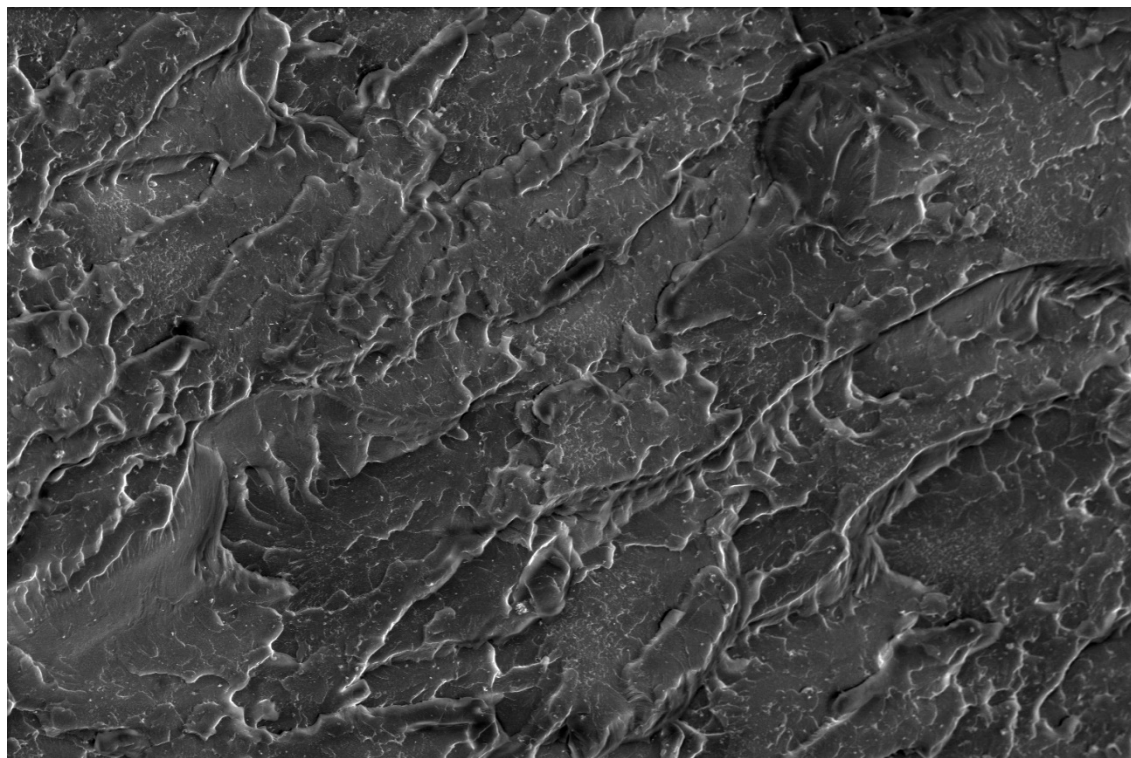

|                                                                                     |            |     |          |         |   |        |          |         |             |  |
|-------------------------------------------------------------------------------------|------------|-----|----------|---------|---|--------|----------|---------|-------------|--|
|  | 3/17/2021  | det | HV       | mag     | □ | HFW    | pressure | WD      | 50 µm       |  |
|                                                                                     | 2:57:44 PM | LFD | 10.00 kV | 2 000 x |   | 207 µm | 70 Pa    | 10.5 mm | www.wczt.pl |  |

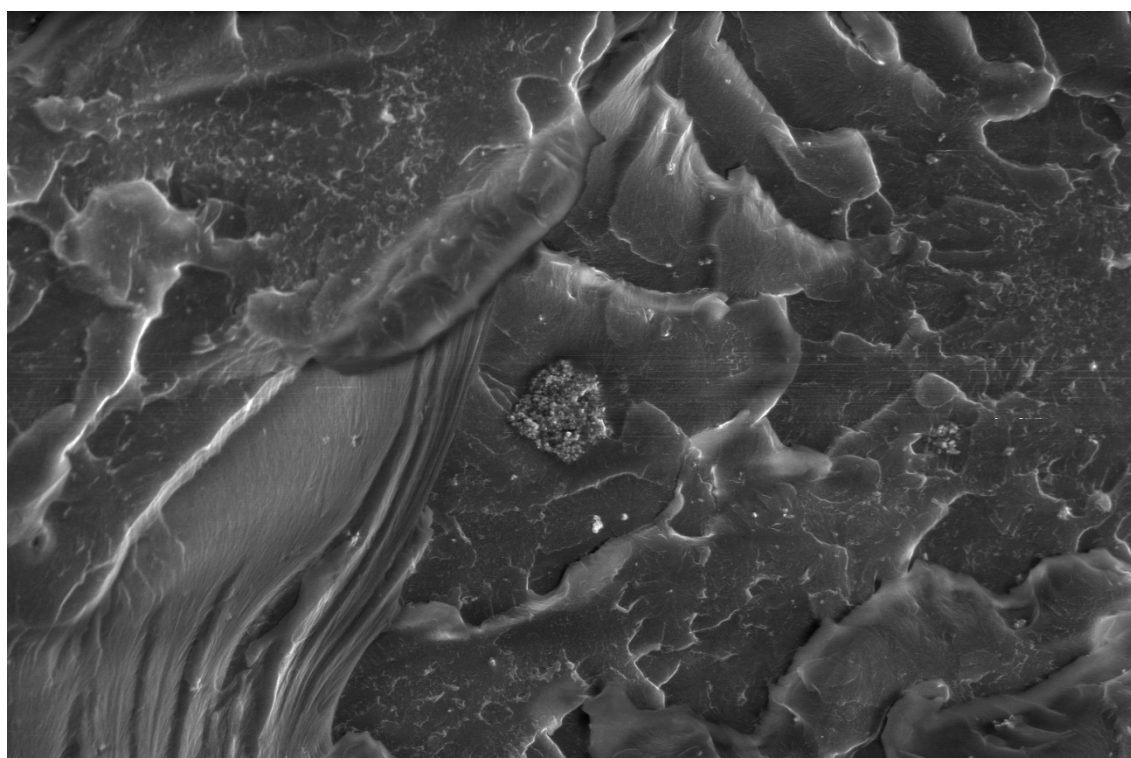

|                                                                                     |            |     |          |         |   |         |          |         |             |  |
|-------------------------------------------------------------------------------------|------------|-----|----------|---------|---|---------|----------|---------|-------------|--|
|  | 3/17/2021  | det | HV       | mag     | □ | HFW     | pressure | WD      | 20 µm       |  |
|                                                                                     | 3:00:34 PM | LFD | 10.00 kV | 5 000 x |   | 82.9 µm | 70 Pa    | 10.5 mm | www.wczt.pl |  |



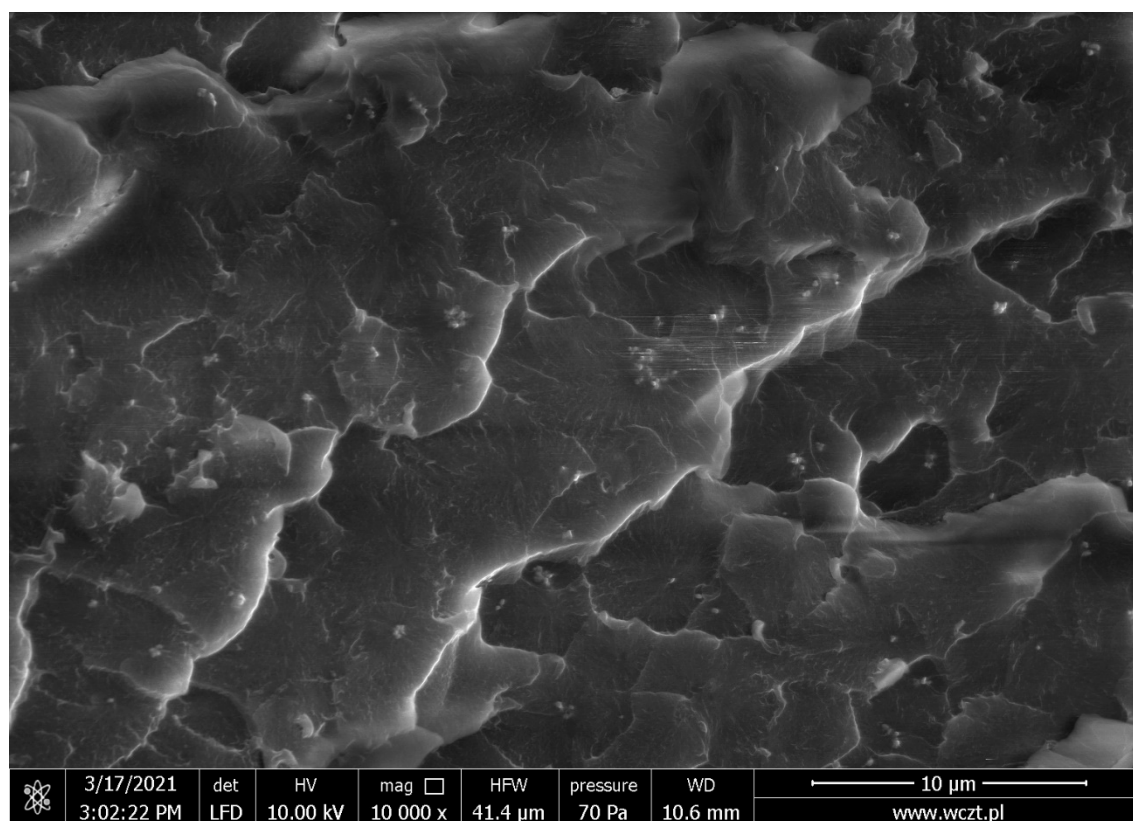



**2%TiO<sub>2</sub>, 1.5% SS-5GP-3TMOS, mixing pump**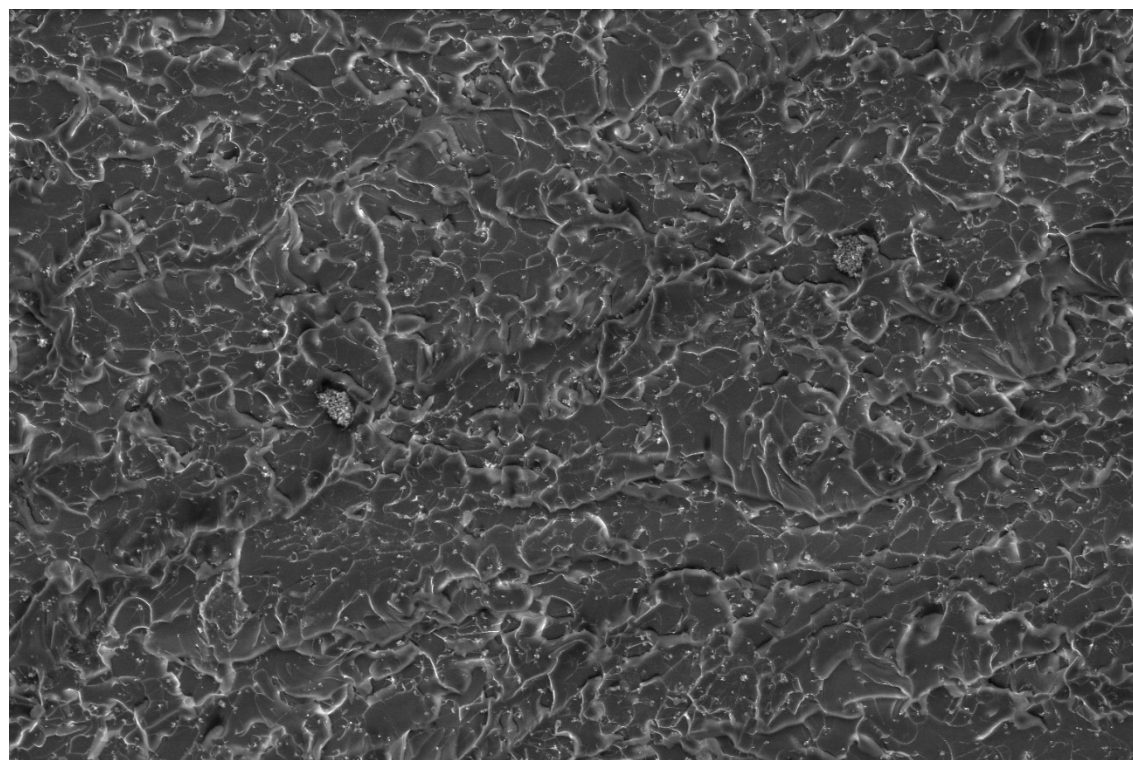

|                                                                                     |            |     |          |         |   |        |          |         |       |
|-------------------------------------------------------------------------------------|------------|-----|----------|---------|---|--------|----------|---------|-------|
|  | 3/15/2021  | det | HV       | mag     | □ | HFW    | pressure | WD      | 50 µm |
|                                                                                     | 2:16:10 PM | LFD | 10.00 kV | 1 500 x |   | 276 µm | 70 Pa    | 10.2 mm |       |

www.wczt.pl

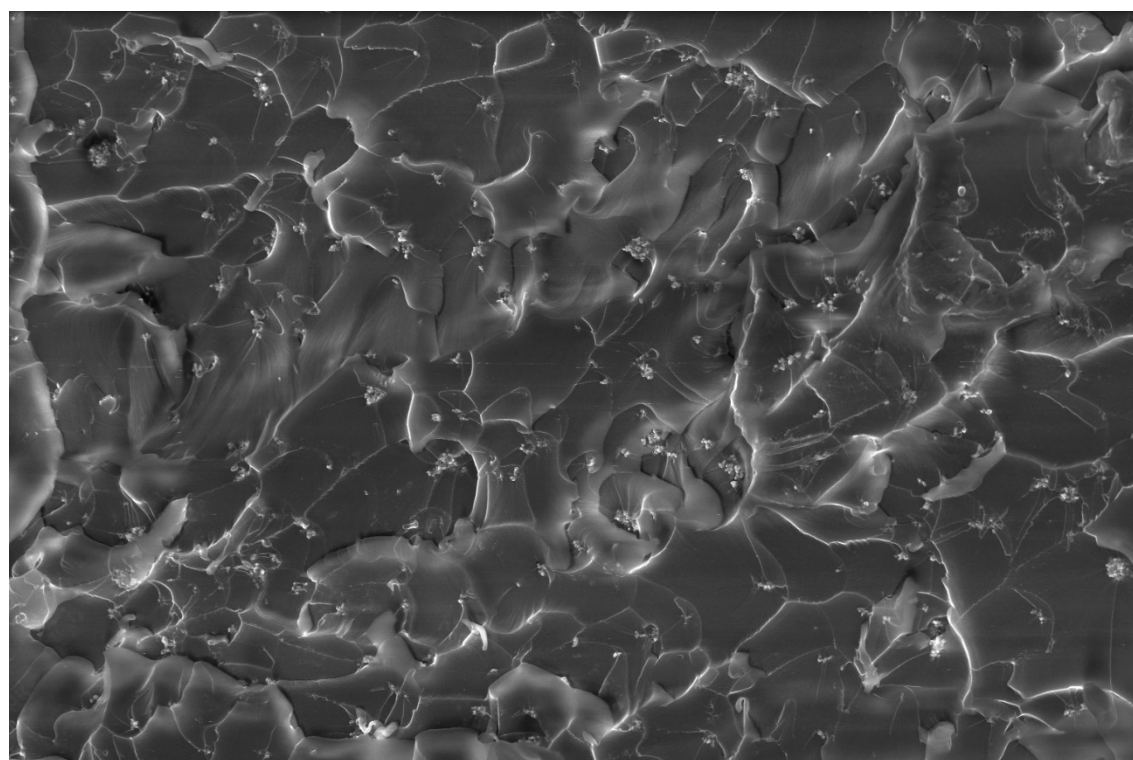

|                                                                                     |            |     |          |         |   |         |          |         |       |
|-------------------------------------------------------------------------------------|------------|-----|----------|---------|---|---------|----------|---------|-------|
|  | 3/15/2021  | det | HV       | mag     | □ | HFW     | pressure | WD      | 20 µm |
|                                                                                     | 2:25:21 PM | LFD | 10.00 kV | 5 000 x |   | 82.9 µm | 70 Pa    | 10.2 mm |       |

www.wczt.pl

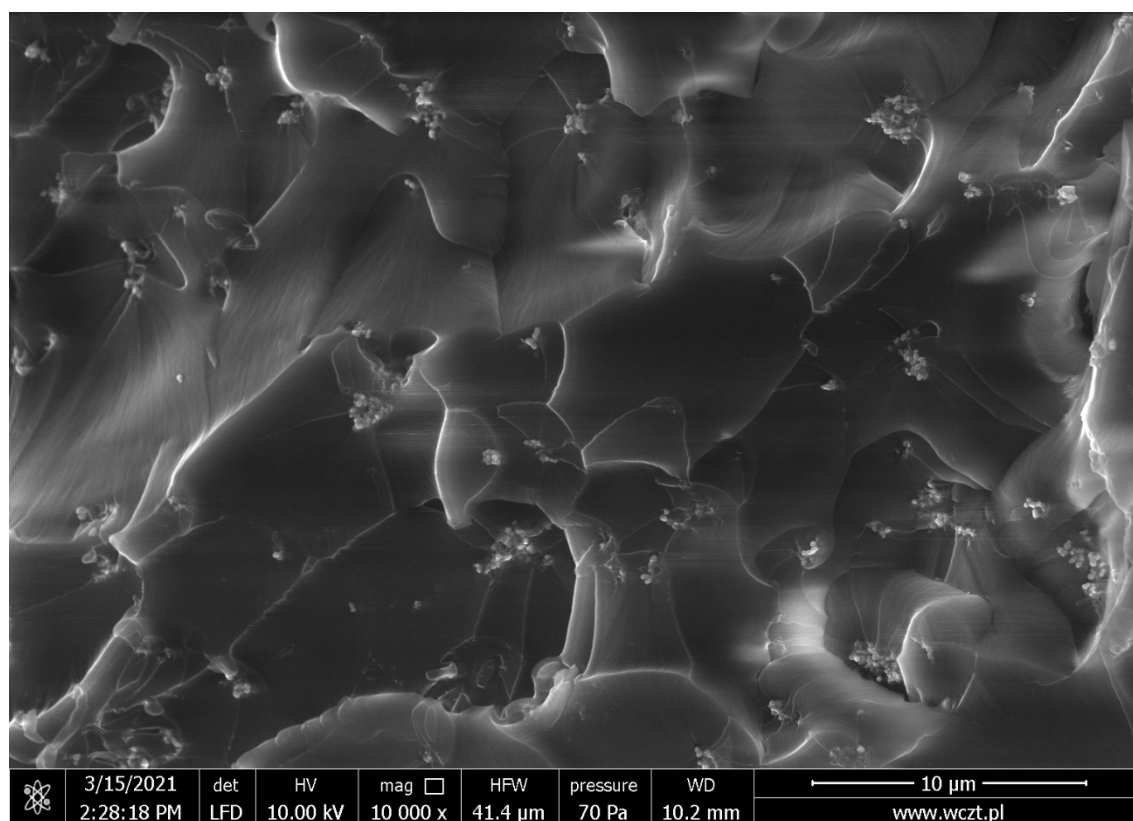

Supplement: s1 [file s1]
